# Supplementary material
Source: PubMed Central journal article supplement (PMC3913167)

## Supporting Information

### **Napyradiomycin Derivatives, Produced by a Marine-Derived Actinomycete, Illustrate Cytotoxicity by Induction of Apoptosis**

Lauga Farnaes,<sup>†</sup> Nicole G. Coufal,<sup>§</sup> Christopher A. Kauffman,<sup>†</sup> Arnold L. Rheingold,<sup>‡</sup> Antonio G. DiPasquale,<sup>‡</sup> Paul R. Jensen<sup>†</sup> and William Fenical<sup>\*†</sup>

<sup>†</sup> *Center for Marine Biotechnology and Biomedicine, Scripps Institution of Oceanography, University of California at San Diego, La Jolla, CA 92093-0204*

<sup>§</sup> *Graduate Program in Neurosciences, University of California at San Diego, La Jolla, CA 92093.*

*Department of Chemistry and Biochemistry, University of California at San Diego, La Jolla, CA 92093-0358*

## Table of Contents

|                                                                     |     |
|---------------------------------------------------------------------|-----|
| HR-FTMS Spectrum of Napyradiomycin CNQ525.510B (1)                  | S1  |
| <sup>1</sup> H NMR Spectrum (1D) of Napyradiomycin CNQ525.510B (1)  | S2  |
| <sup>13</sup> C NMR Spectrum (1D) of Napyradiomycin CNQ525.510B (1) | S3  |
| COSY NMR Spectrum of Napyradiomycin CNQ525.510B (1)                 | S4  |
| HMBC NMR Spectrum of Napyradiomycin CNQ525.510B (1)                 | S5  |
| HSQC NMR Spectrum of Napyradiomycin CNQ525.510B (1)                 | S6  |
| HR MALDI MS Spectrum of Napyradiomycin CNQ525.538 (2)               | S7  |
| <sup>1</sup> H NMR Spectrum (1D) of Napyradiomycin CNQ525.538 (2)   | S8  |
| COSY NMR Spectrum of Napyradiomycin CNQ525.538 (2)                  | S9  |
| HMBC NMR Spectrum of Napyradiomycin CNQ525.538 (2)                  | S10 |
| HSQC NMR Spectrum of Napyradiomycin CNQ525.538 (2)                  | S11 |
| HR-FTMS Spectrum of Napyradiomycin CNQ525.554 (3)                   | S12 |
| <sup>1</sup> H NMR Spectrum (1D) of Napyradiomycin CNQ525.554 (3)   | S13 |
| COSY NMR Spectrum of Napyradiomycin CNQ525.554 (3)                  | S14 |
| HMBC NMR Spectrum of Napyradiomycin CNQ525.554 (3)                  | S15 |
| HSQC NMR Spectrum of Napyradiomycin CNQ525.554 (3)                  | S16 |
| HR MALDI MS Spectrum of Napyradiomycin CNQ525.584 (4)               | S17 |
| <sup>1</sup> H NMR Spectrum (1D) of Napyradiomycin CNQ525.584 (4)   | S18 |
| COSY NMR Spectrum of Napyradiomycin CNQ525.584 (4)                  | S19 |
| HMBC NMR Spectrum of Napyradiomycin CNQ525.584 (4)                  | S20 |
| HSQC NMR Spectrum of Napyradiomycin CNQ525.584 (4)                  | S21 |
| X-Ray Diffraction Data for Napyradiomycin CNQ525.510B (1)           | S22 |
| Raw FACS Data for Four Napyradiomycin Derivatives                   | S39 |

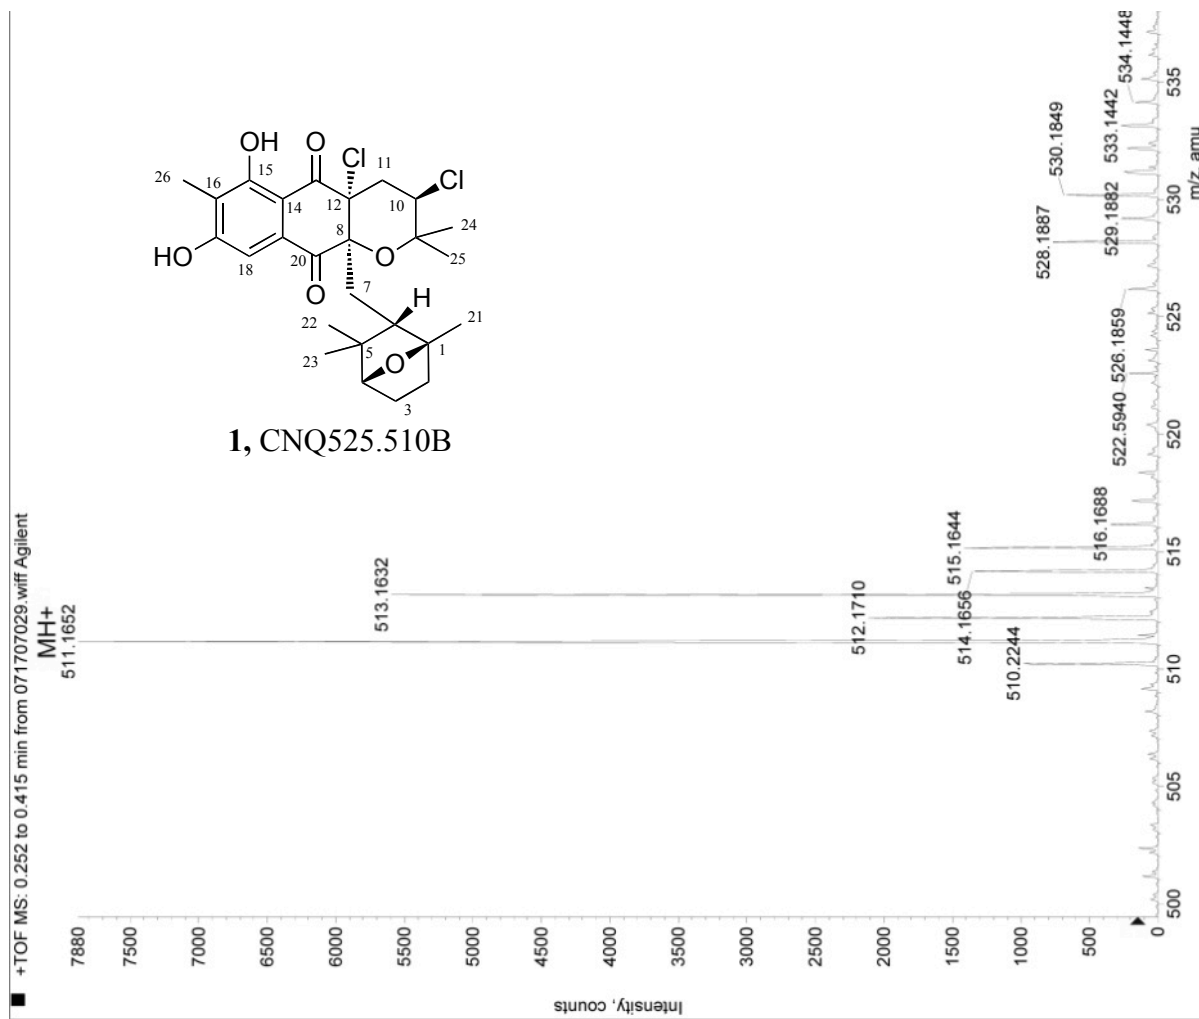

Napyradiomycin CNQ525.510B (1) HR-FTMS spectrum

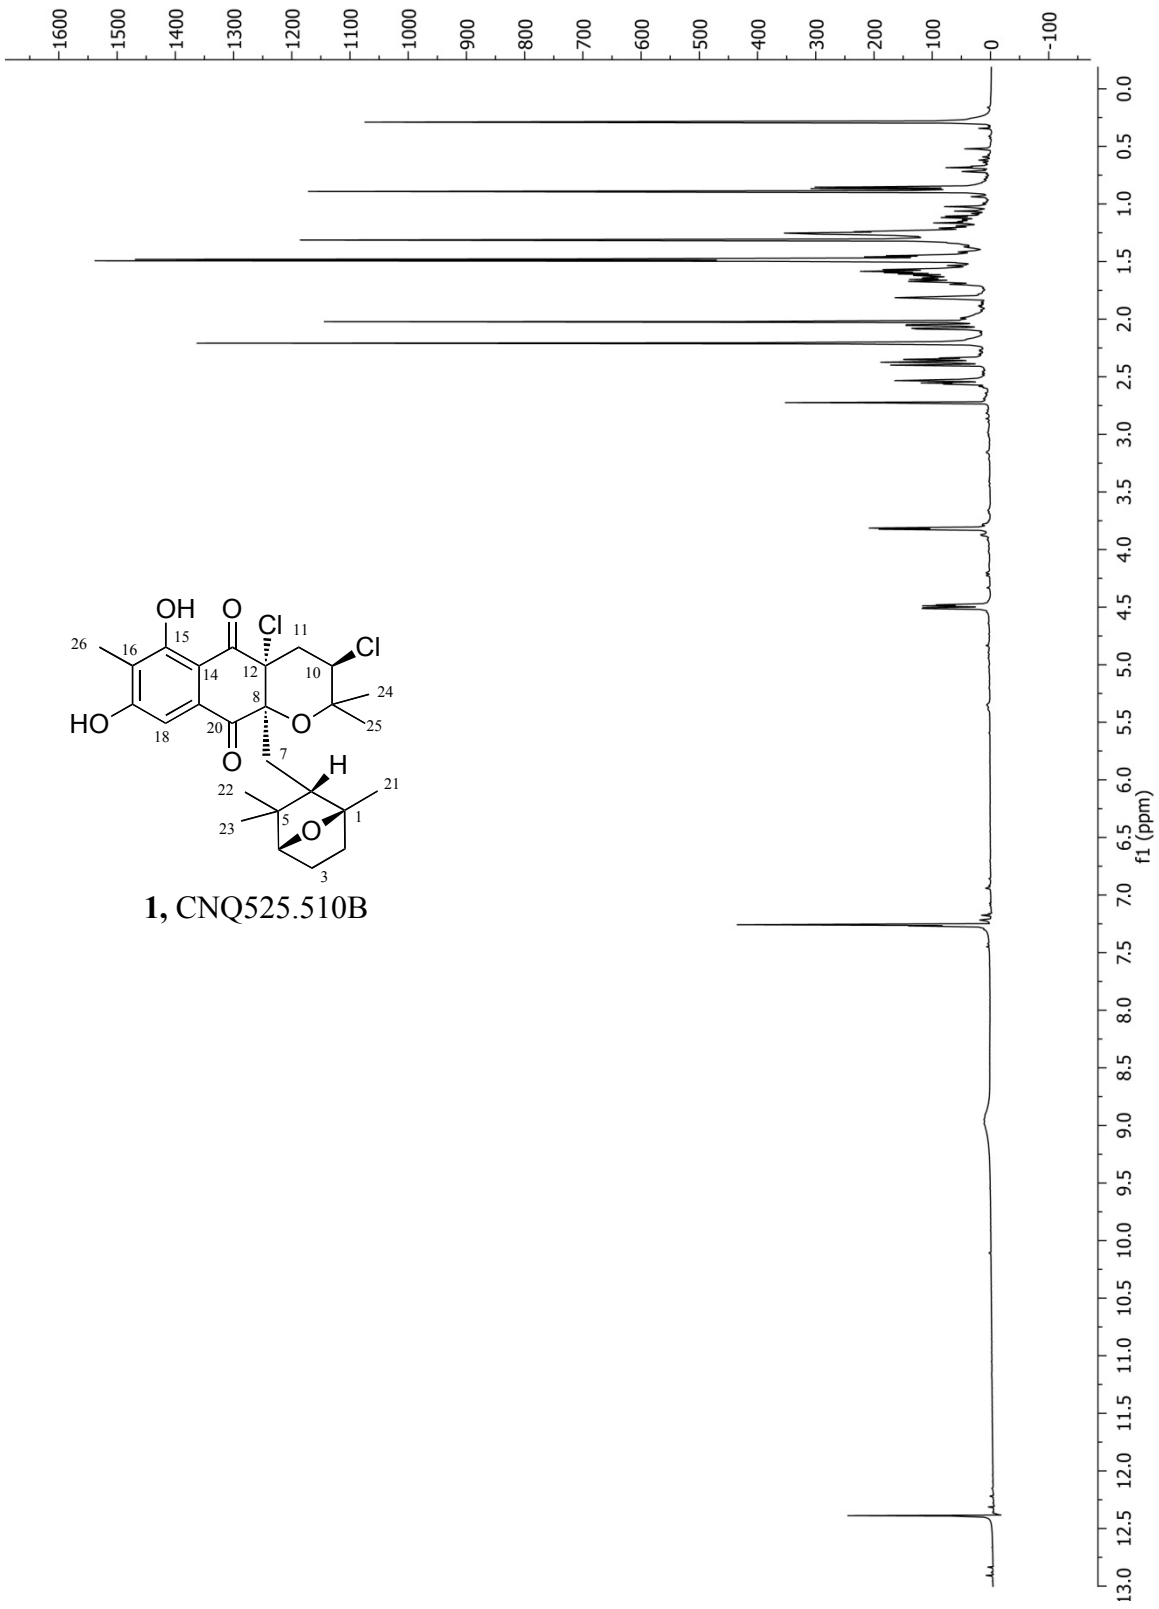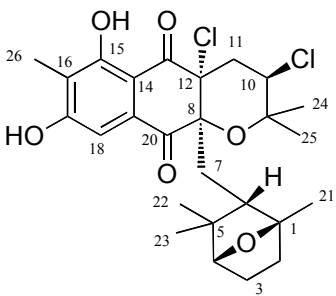

**1**, CNQ525.510B

**Napyradiomycin CNQ525.510B (1)** <sup>1</sup>H NMR spectrum 500 MHz in CDCl<sub>3</sub>

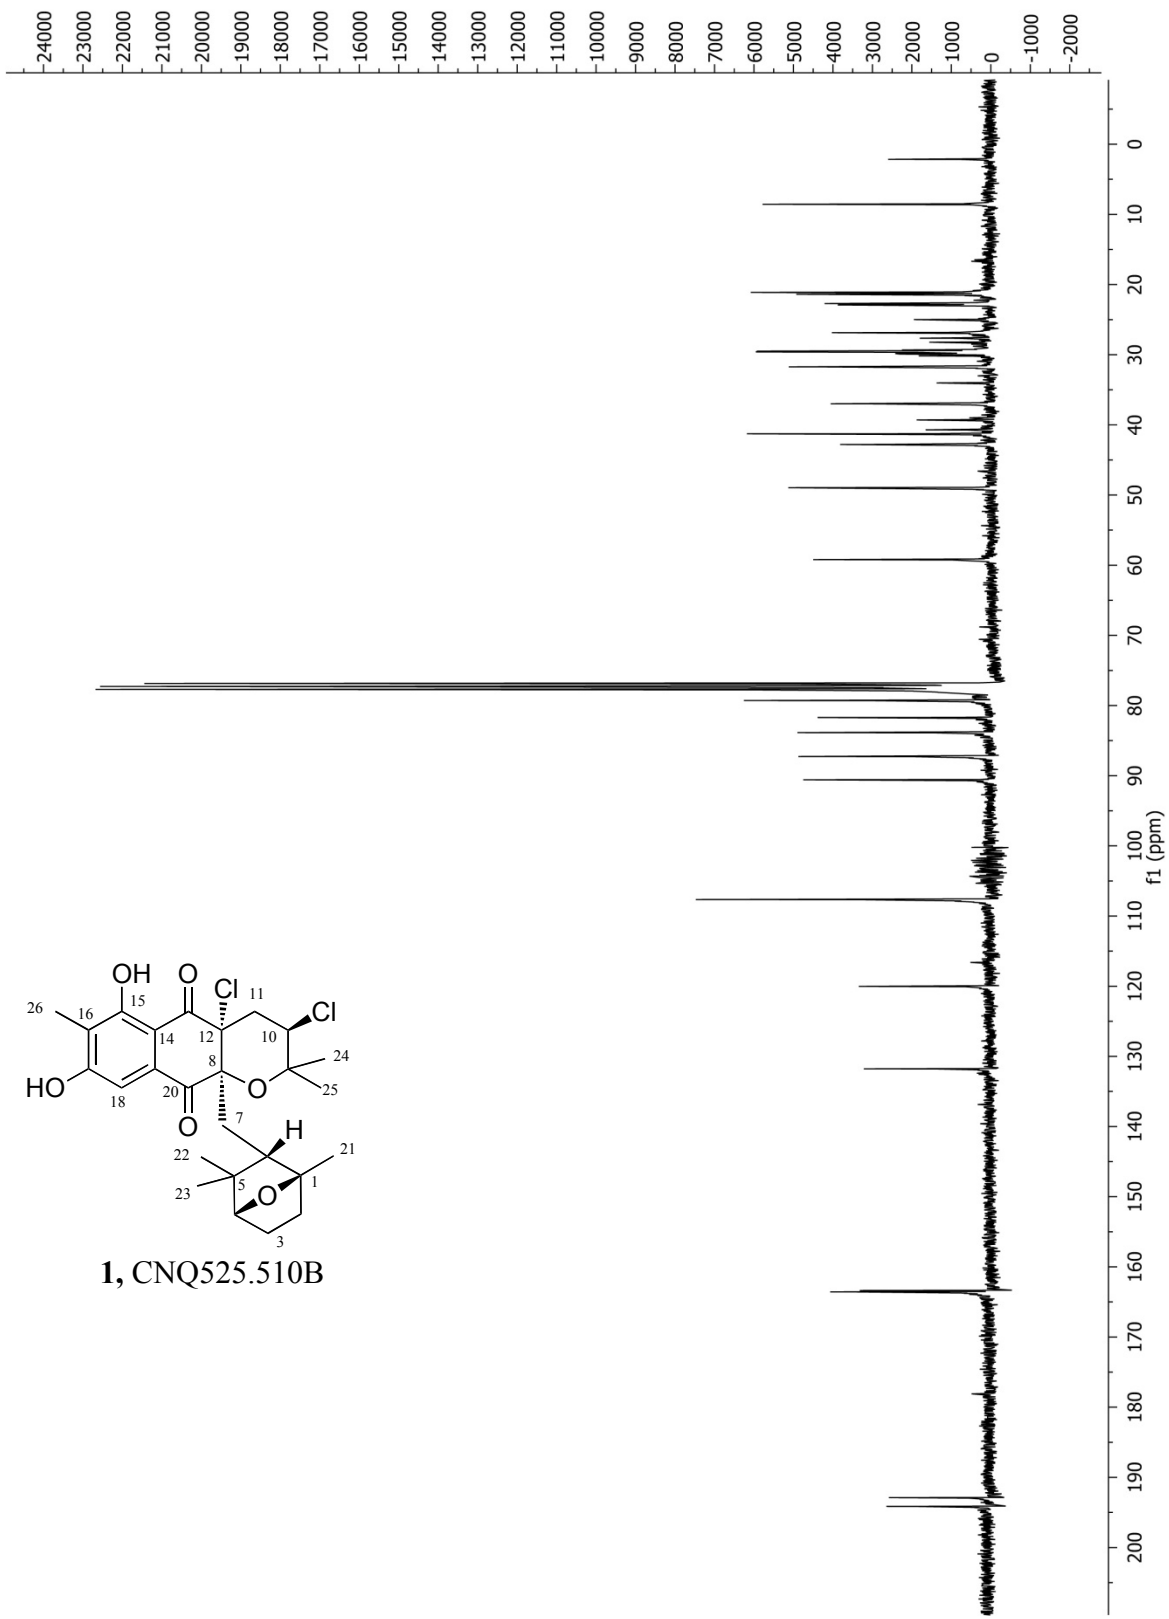

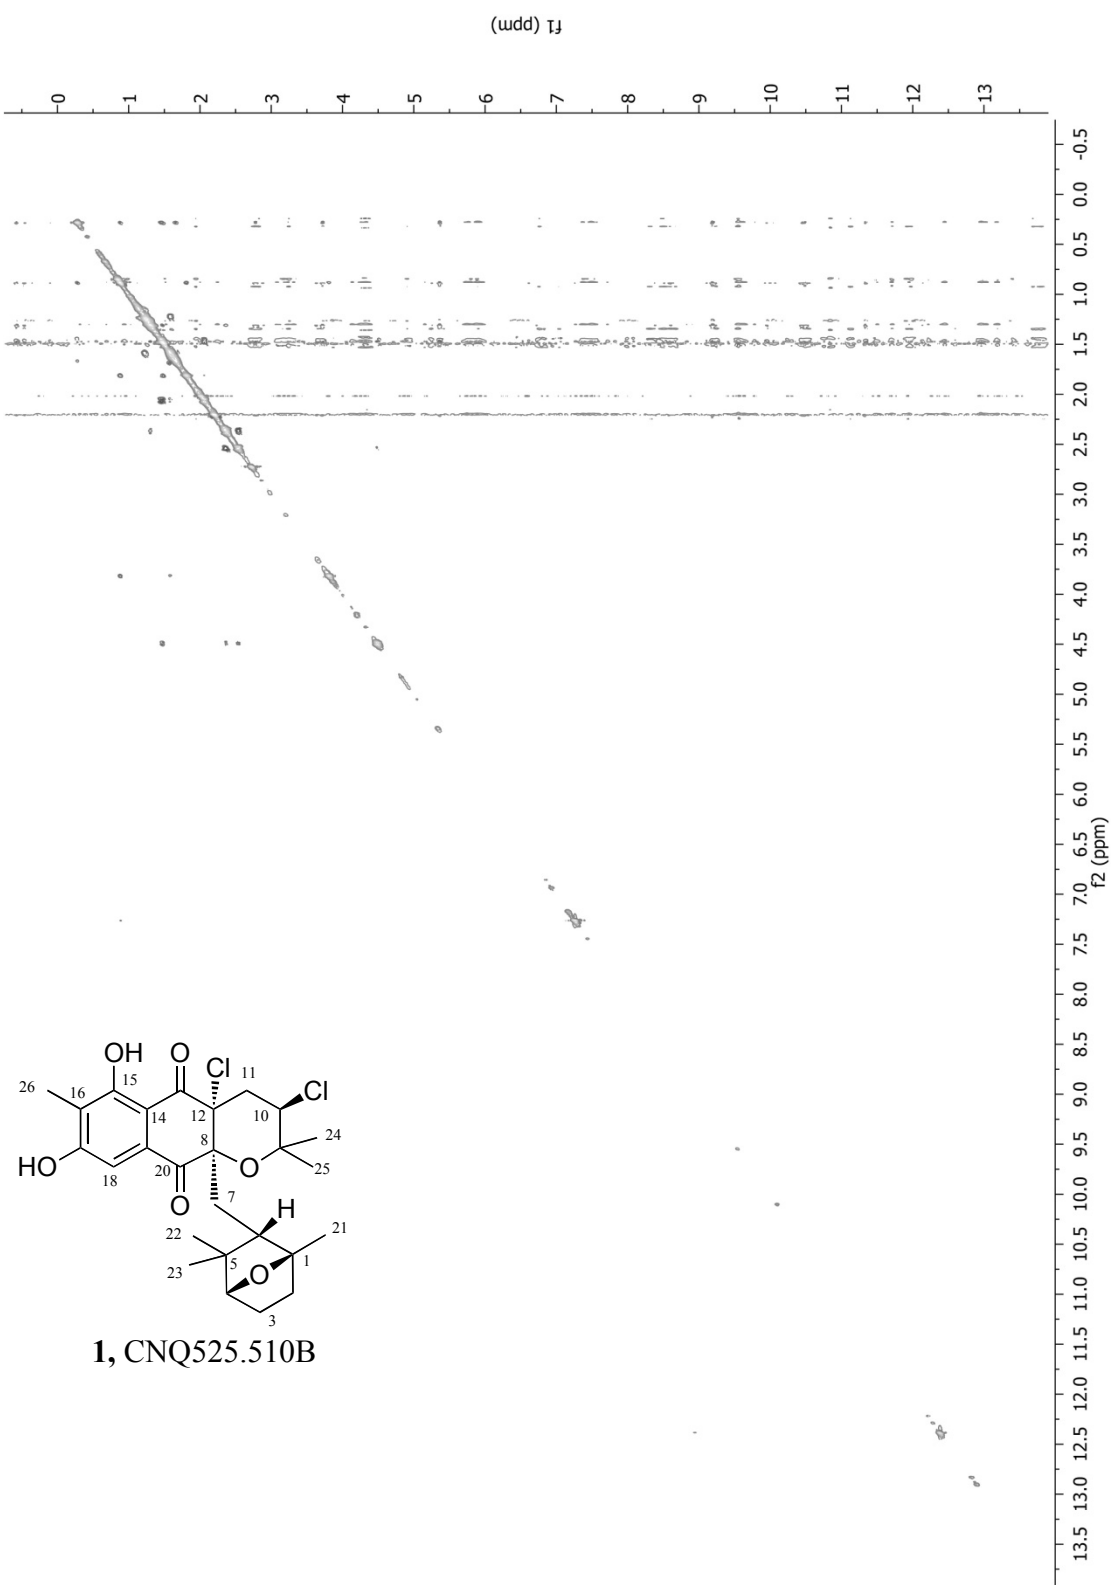

**Napyradiomycin CNQ525.510B (1) COSY NMR spectrum 500 MHz in CDCl<sub>3</sub>**

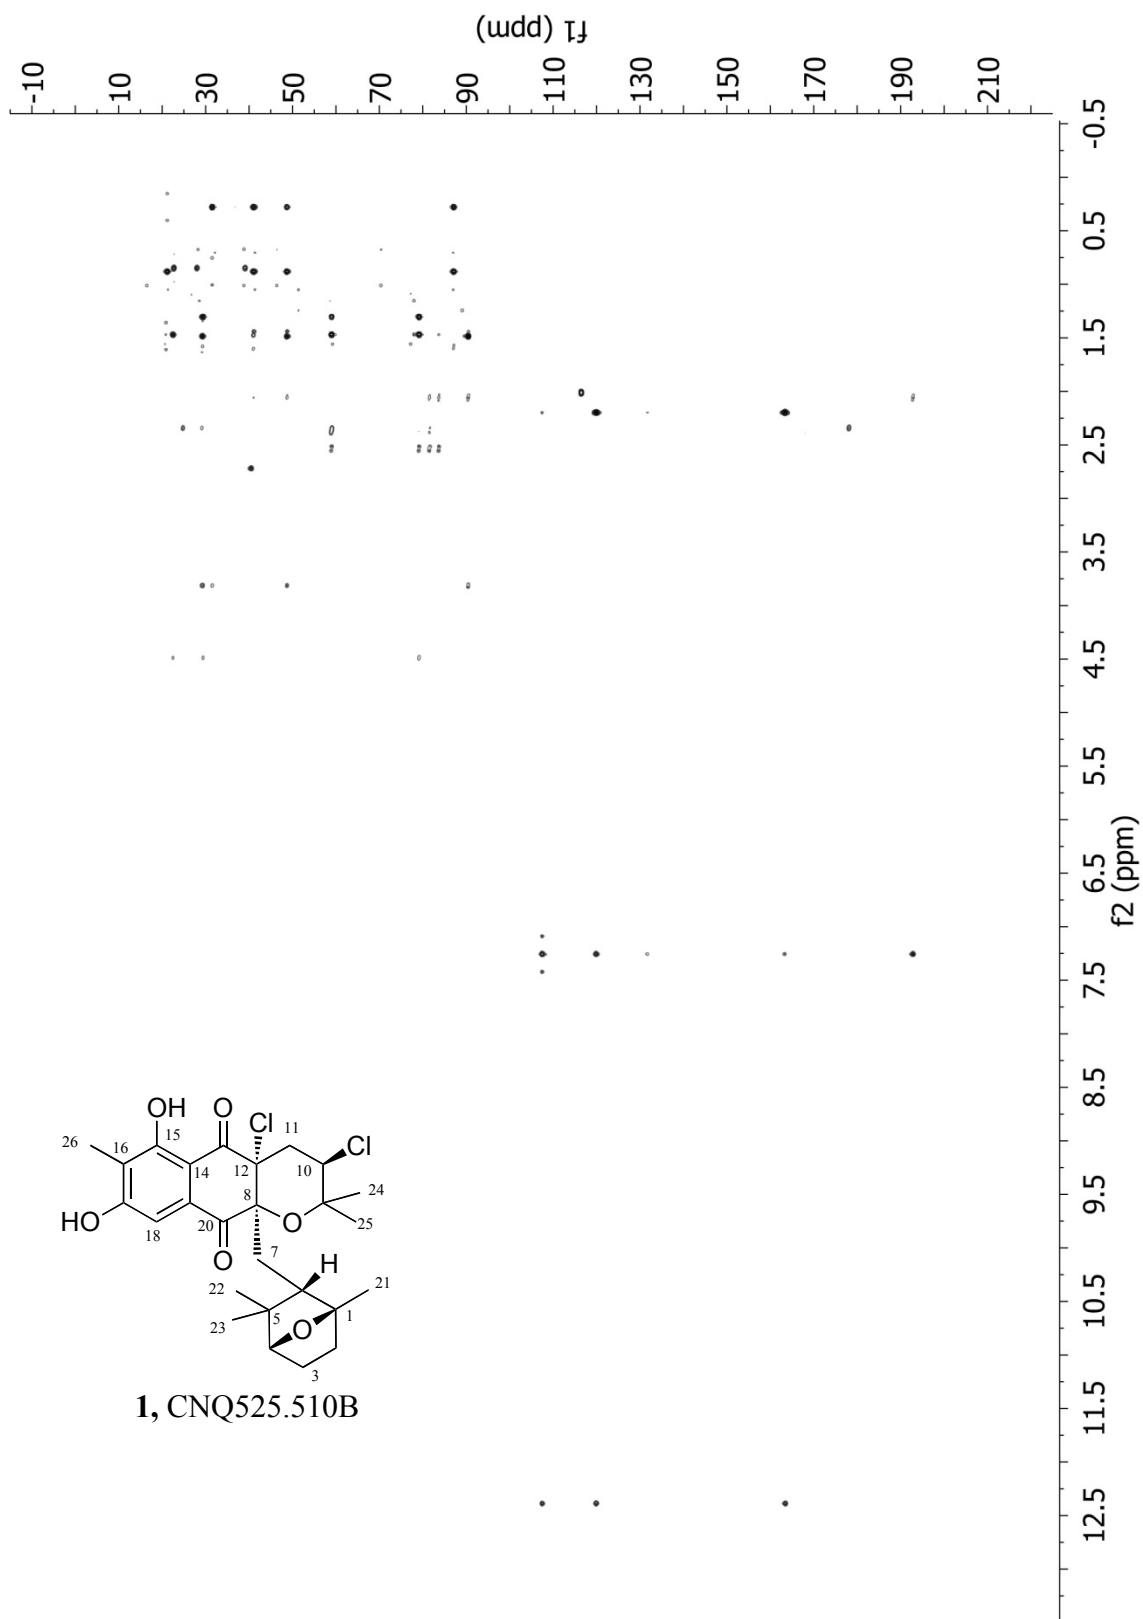

Napyradiomycin CNQ525.510B (1) HMBC NMR spectrum 500 MHz in  $\text{CDCl}_3$

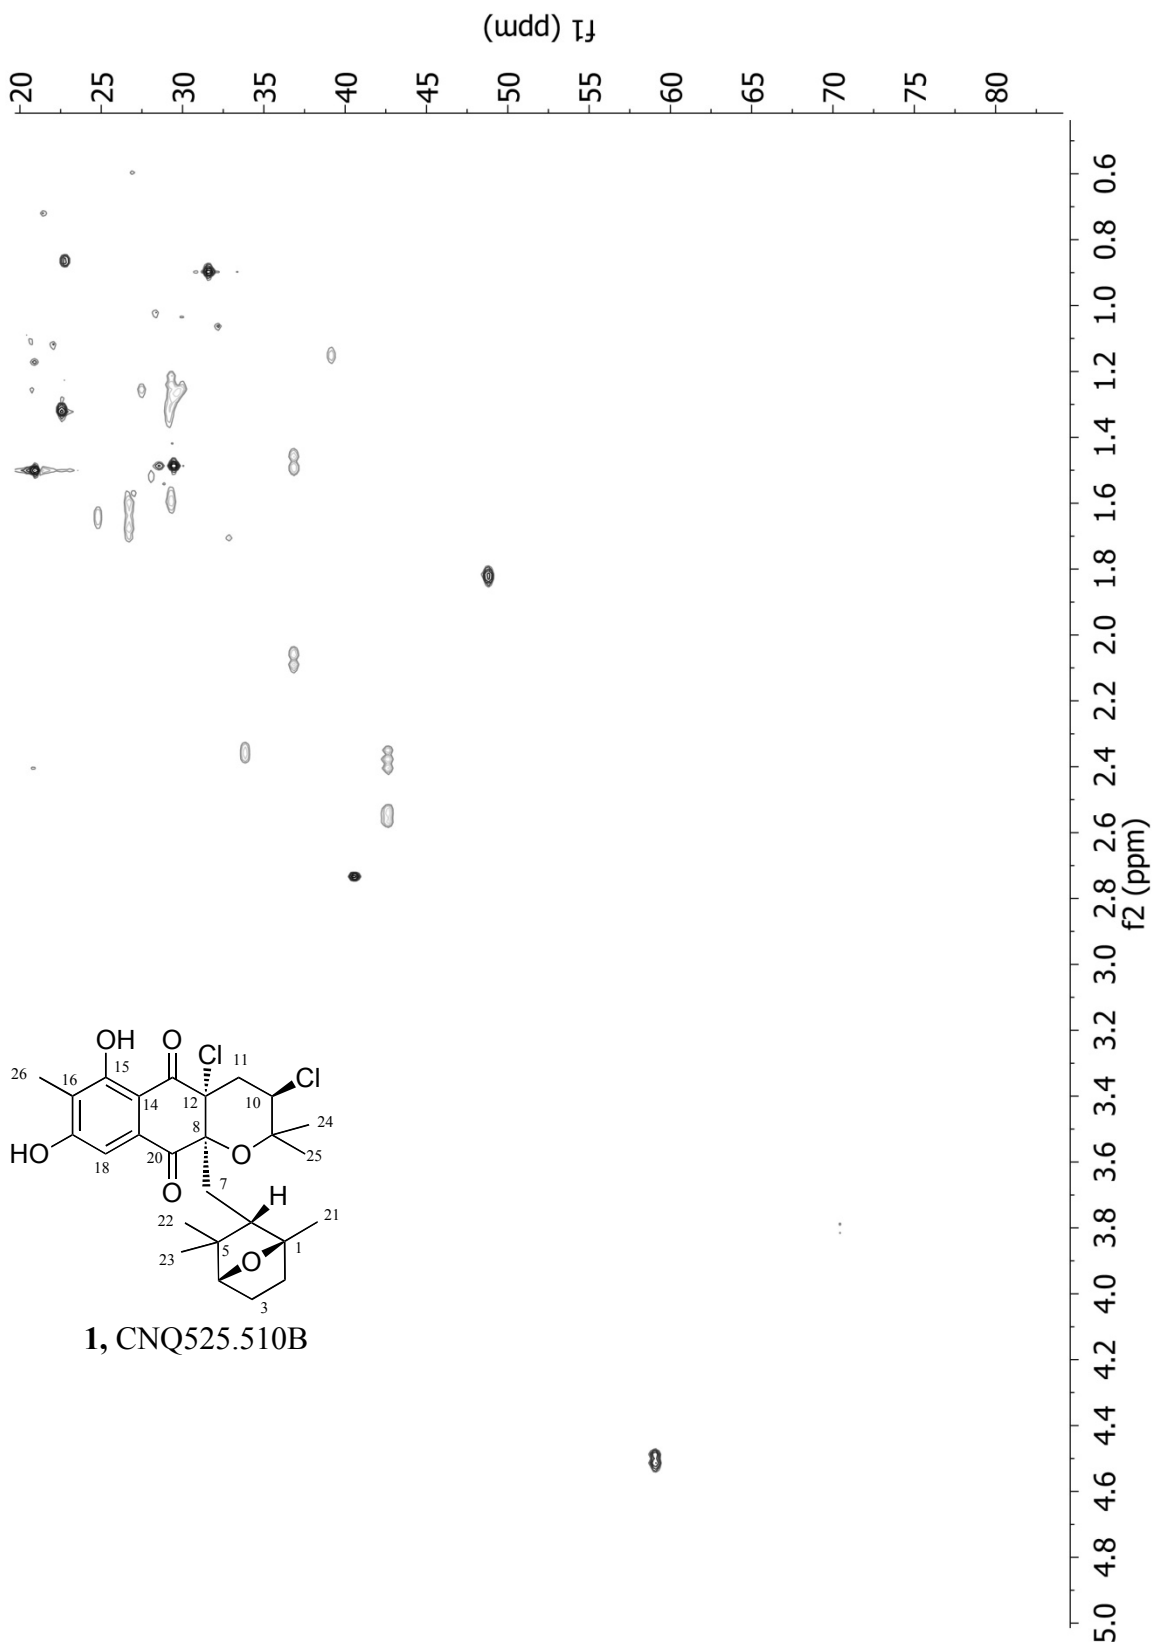

Napyradiomycin CNQ525.510B (1) HSQC NMR spectrum 500 MHz in CDCl<sub>3</sub>



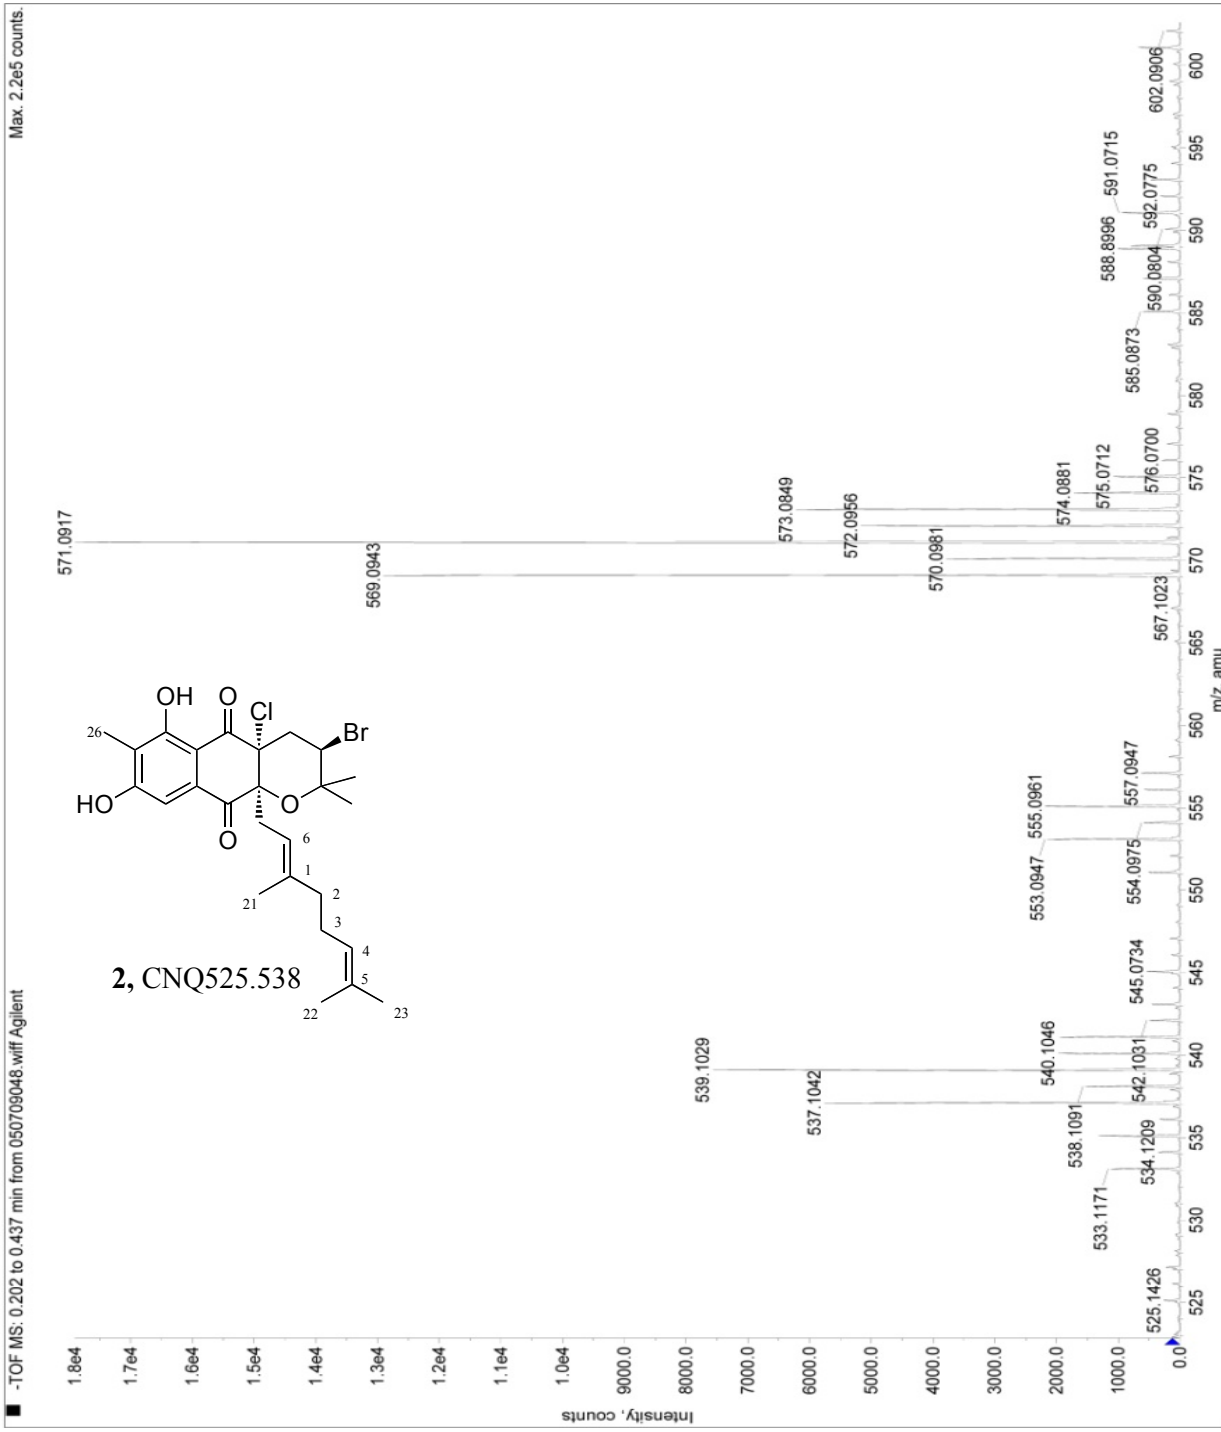

Napyradiomycin CNQ525.538 (2) HRMALDI TOF MS spectrum

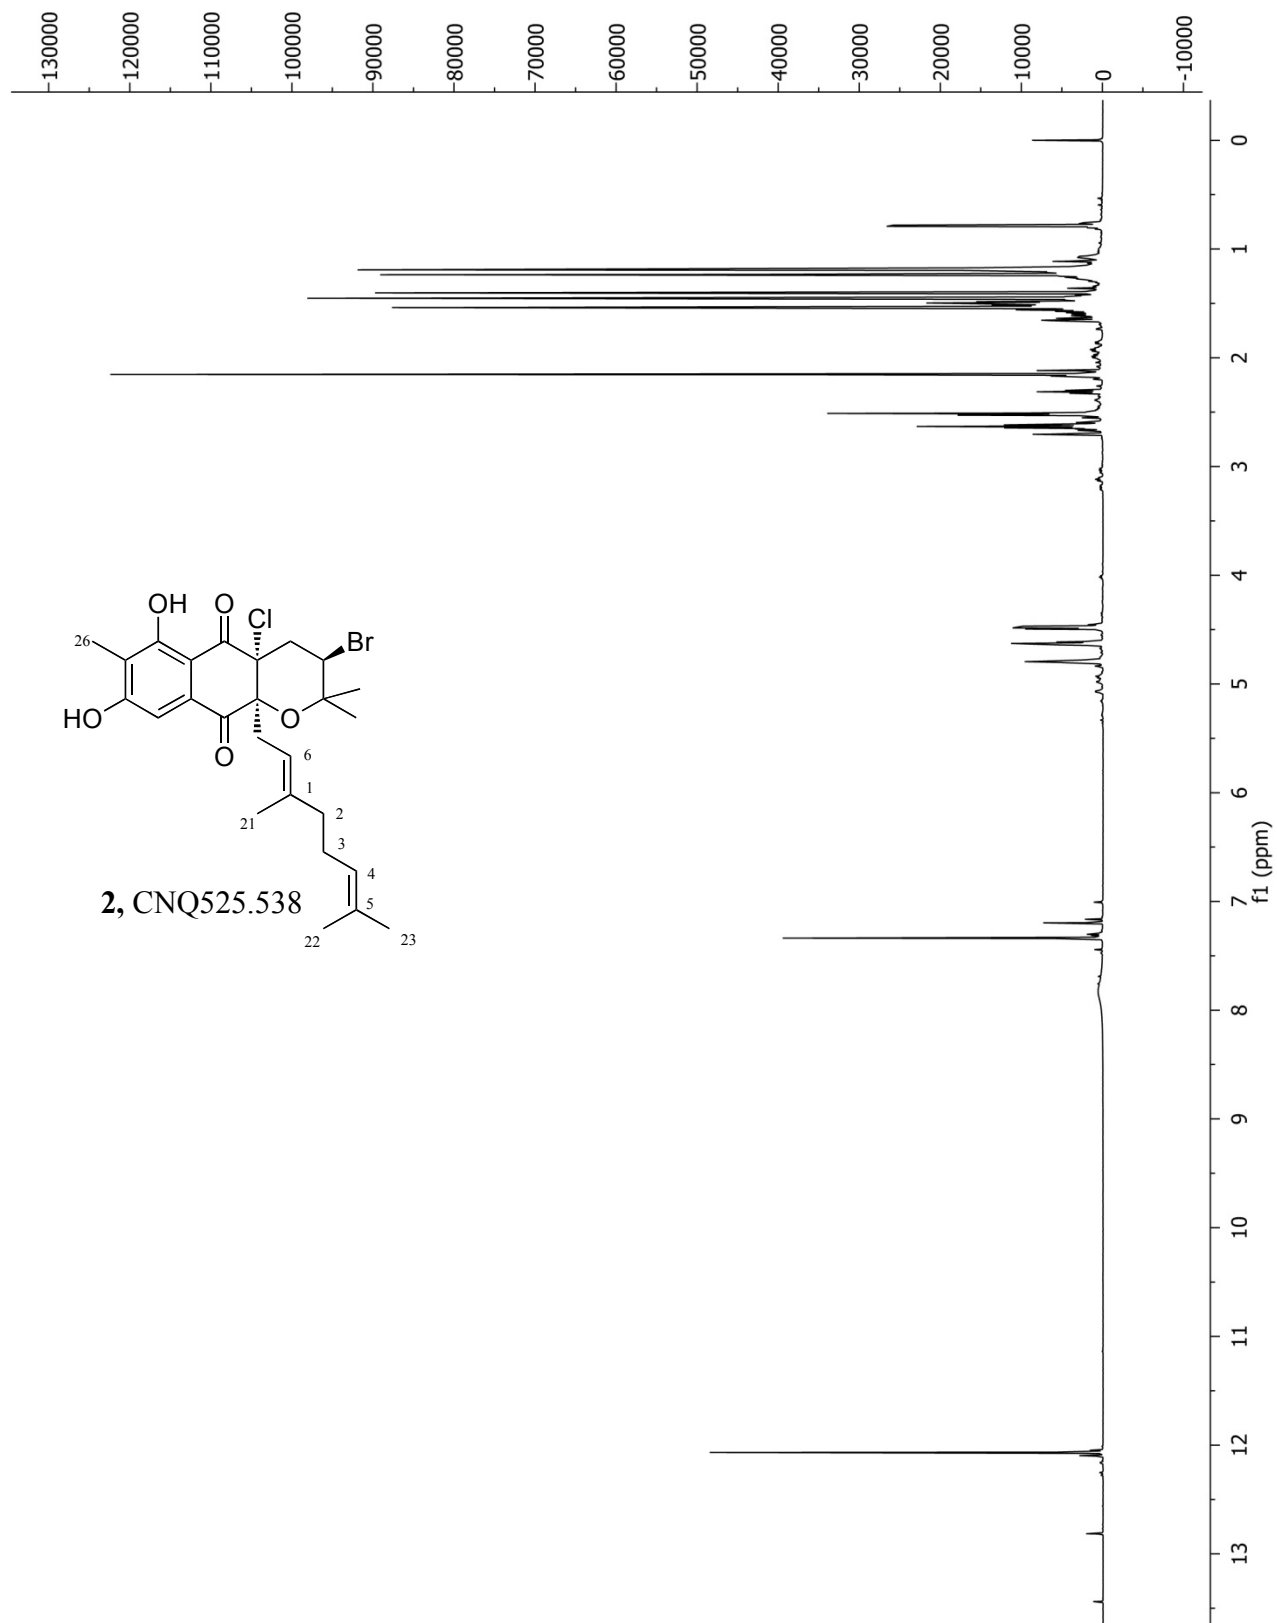

Napyradiomycin CNQ525.538 (2) <sup>1</sup>H NMR spectrum 500 MHz in CDCl<sub>3</sub>

(wdd) Tj

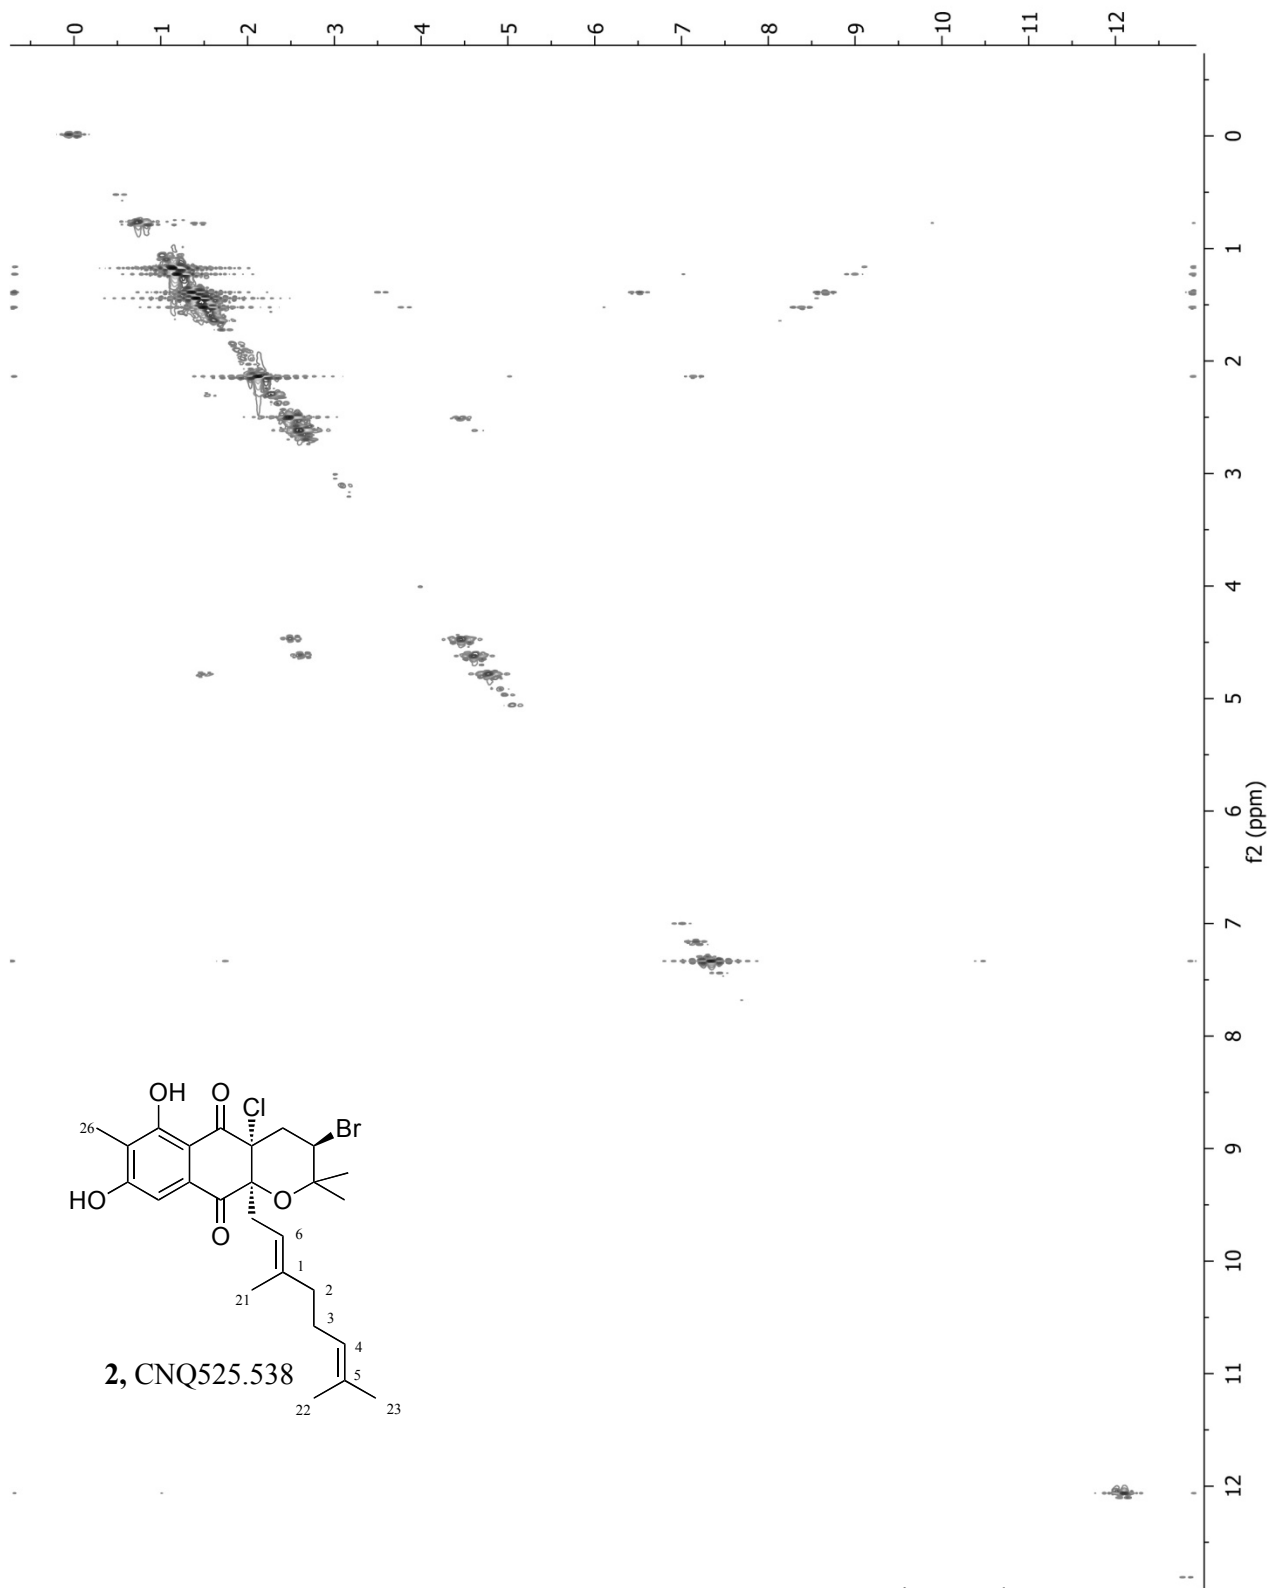

Napyradiomycin CNQ525.538 (2) COSY NMR spectrum 500 MHz in CDCl<sub>3</sub>

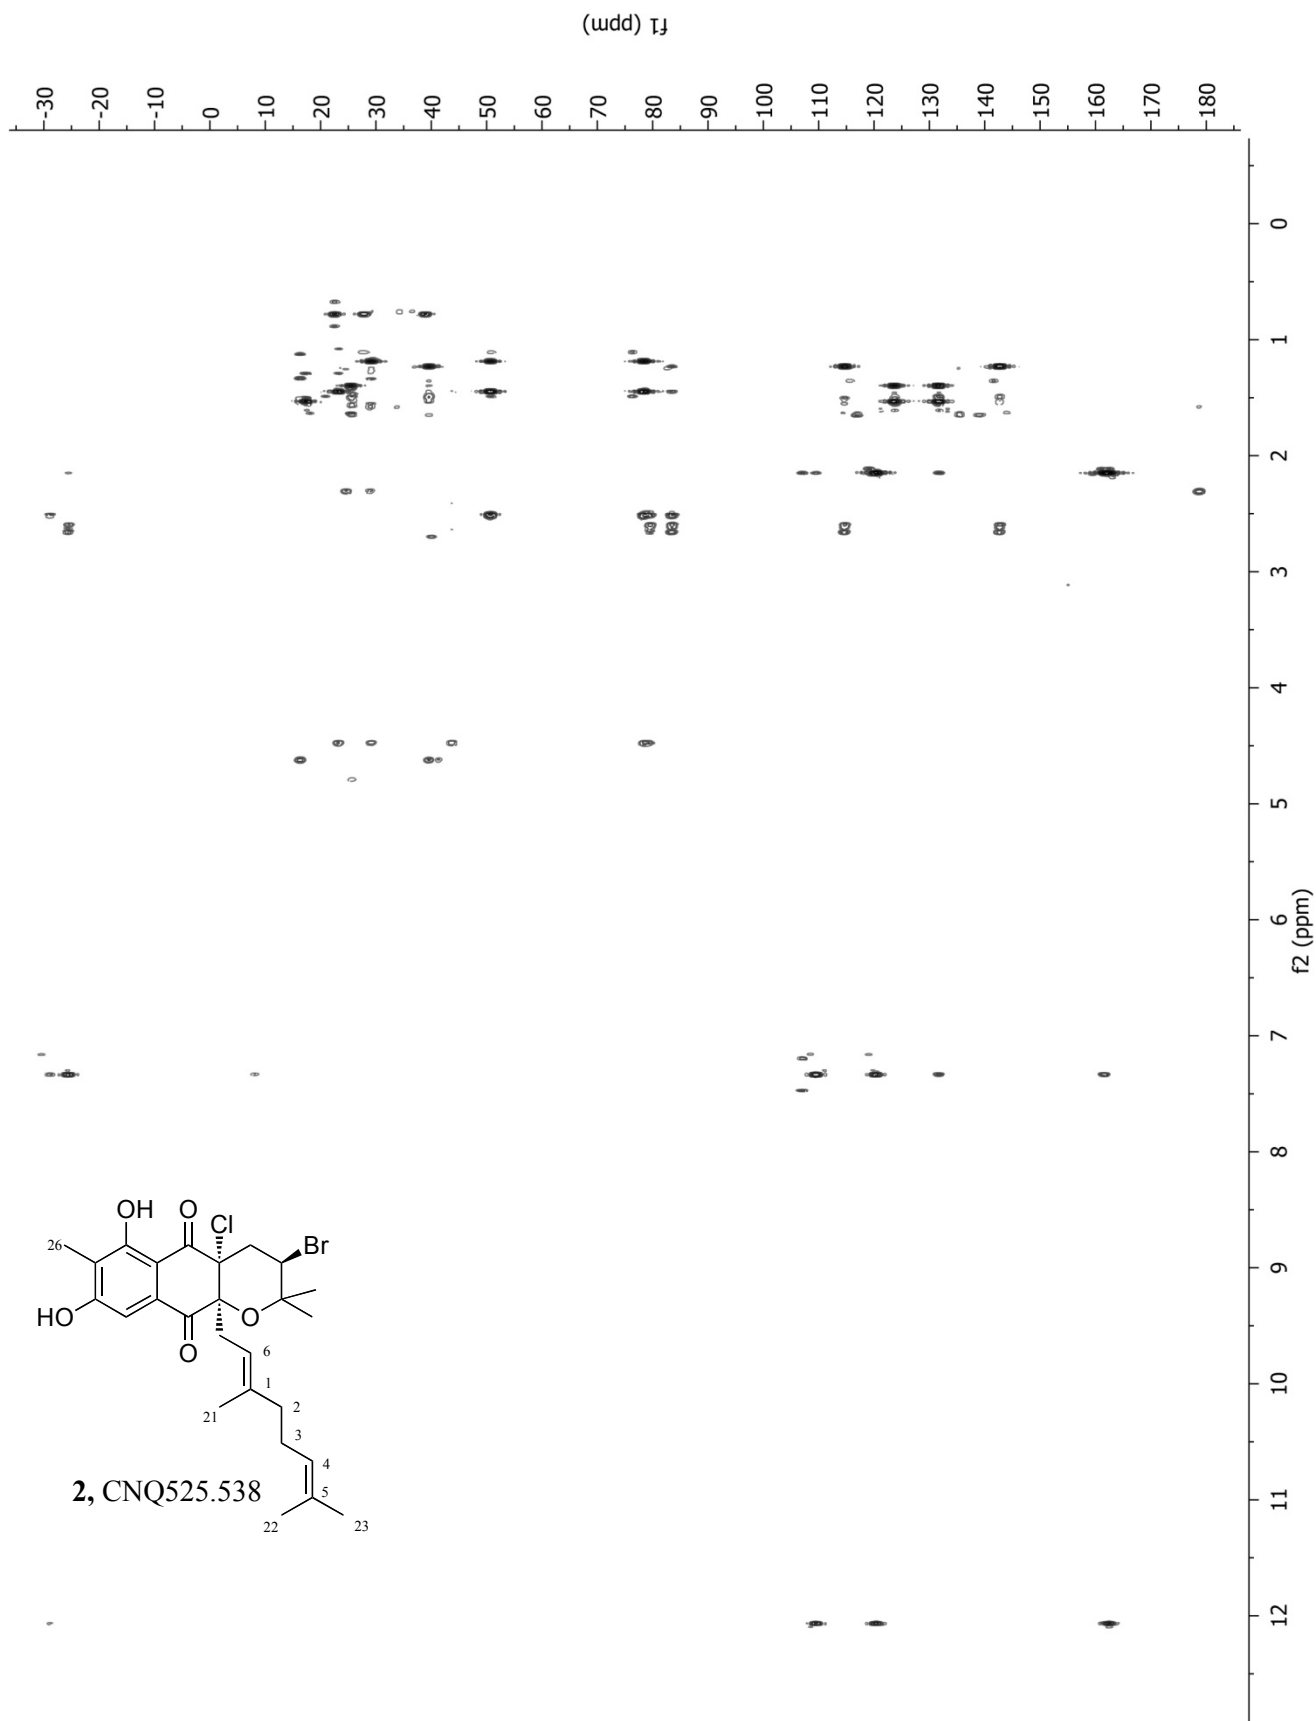

Napyradiomycin CNQ525.538 (2) HMBC NMR spectrum 500 MHz in CDCl<sub>3</sub>

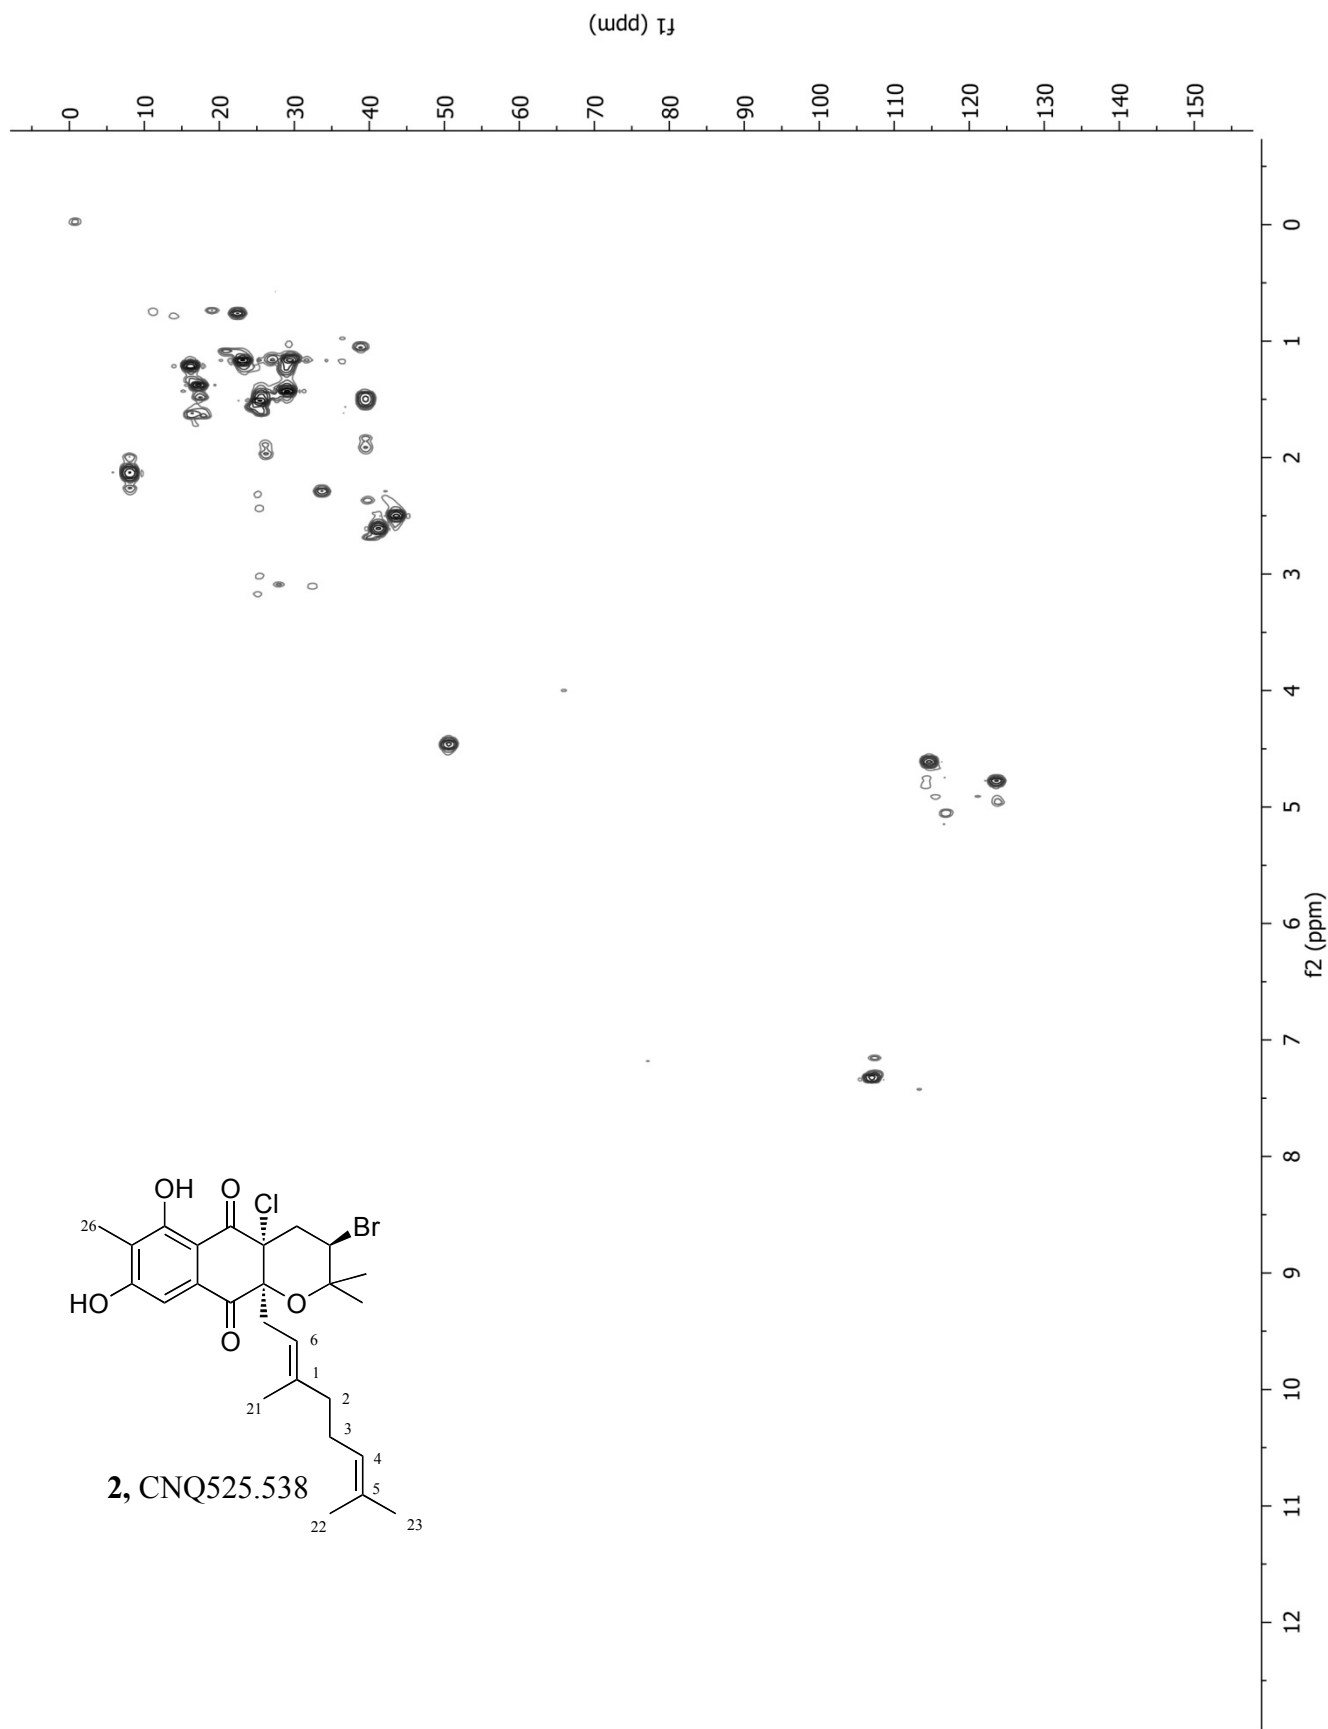

Napyradiomycin CNQ525.538 (2) HSQC NMR spectrum 500 MHz in  $\text{CDCl}_3$

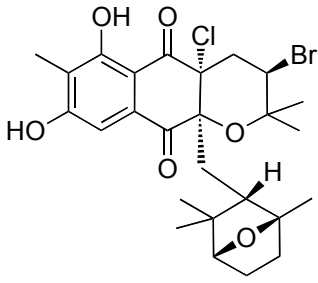

3, CNQ525.554

N96A4 #95-97 RT: 1.50-1.51 AV: 2 NL: 1.10E5  
T: FTMS + p ESI/Full ms [450.00-600.00]

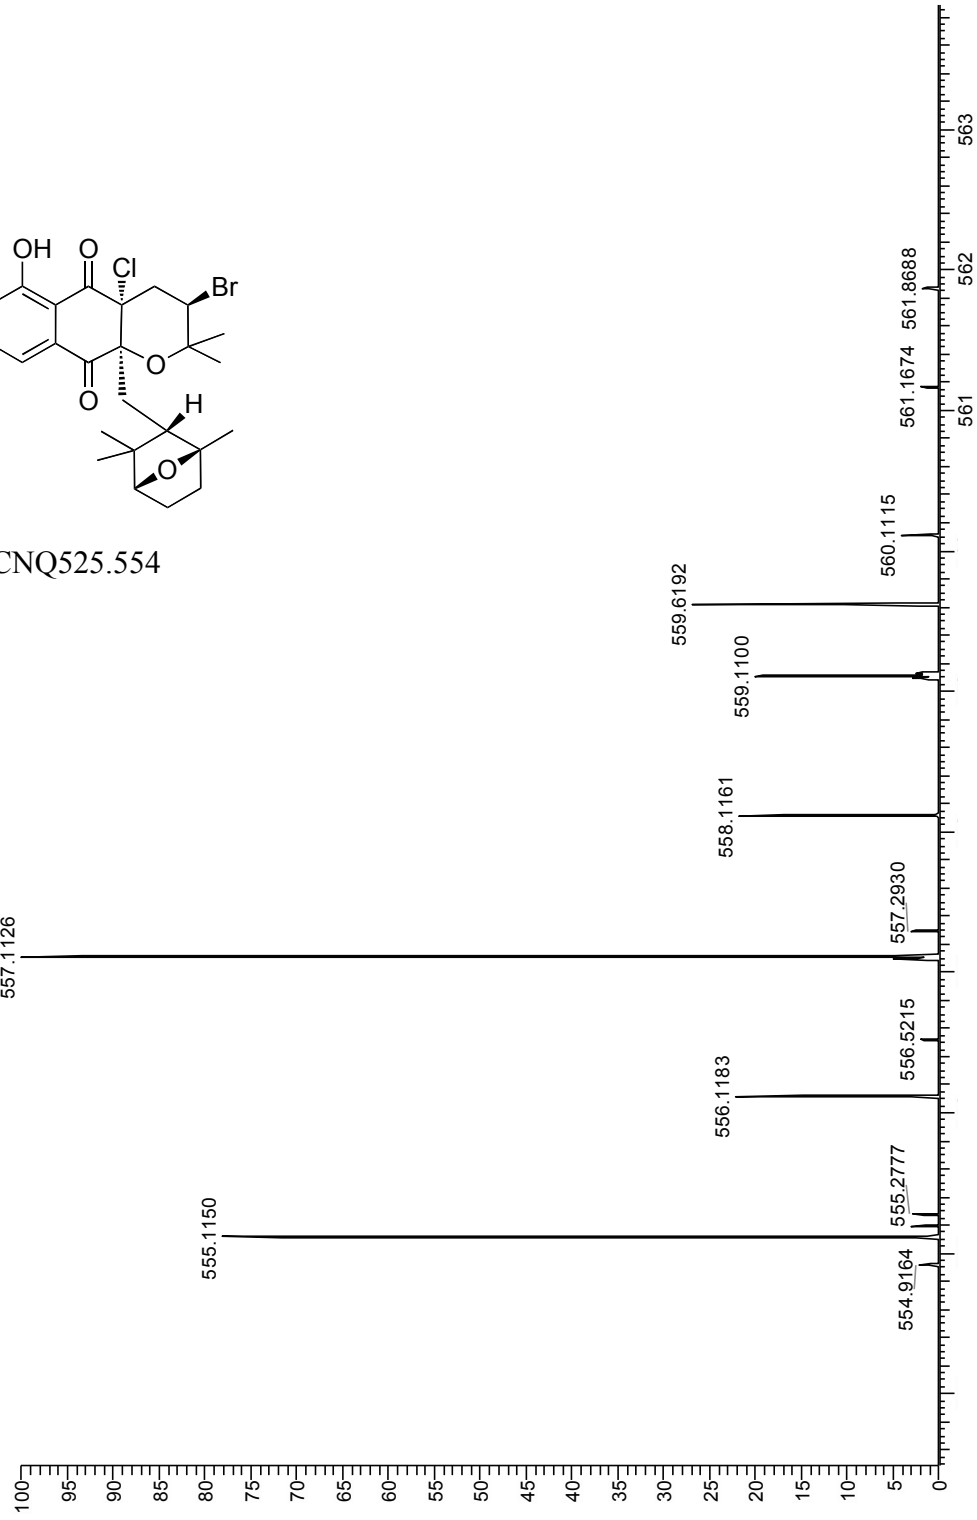

Napyradiomycin CNQ525.554 (3) -FTMS spectrum

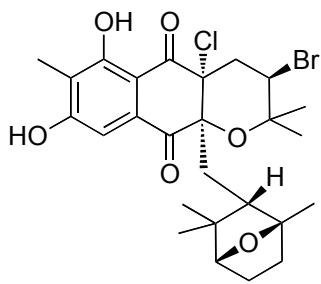

**3**, CNQ525.554

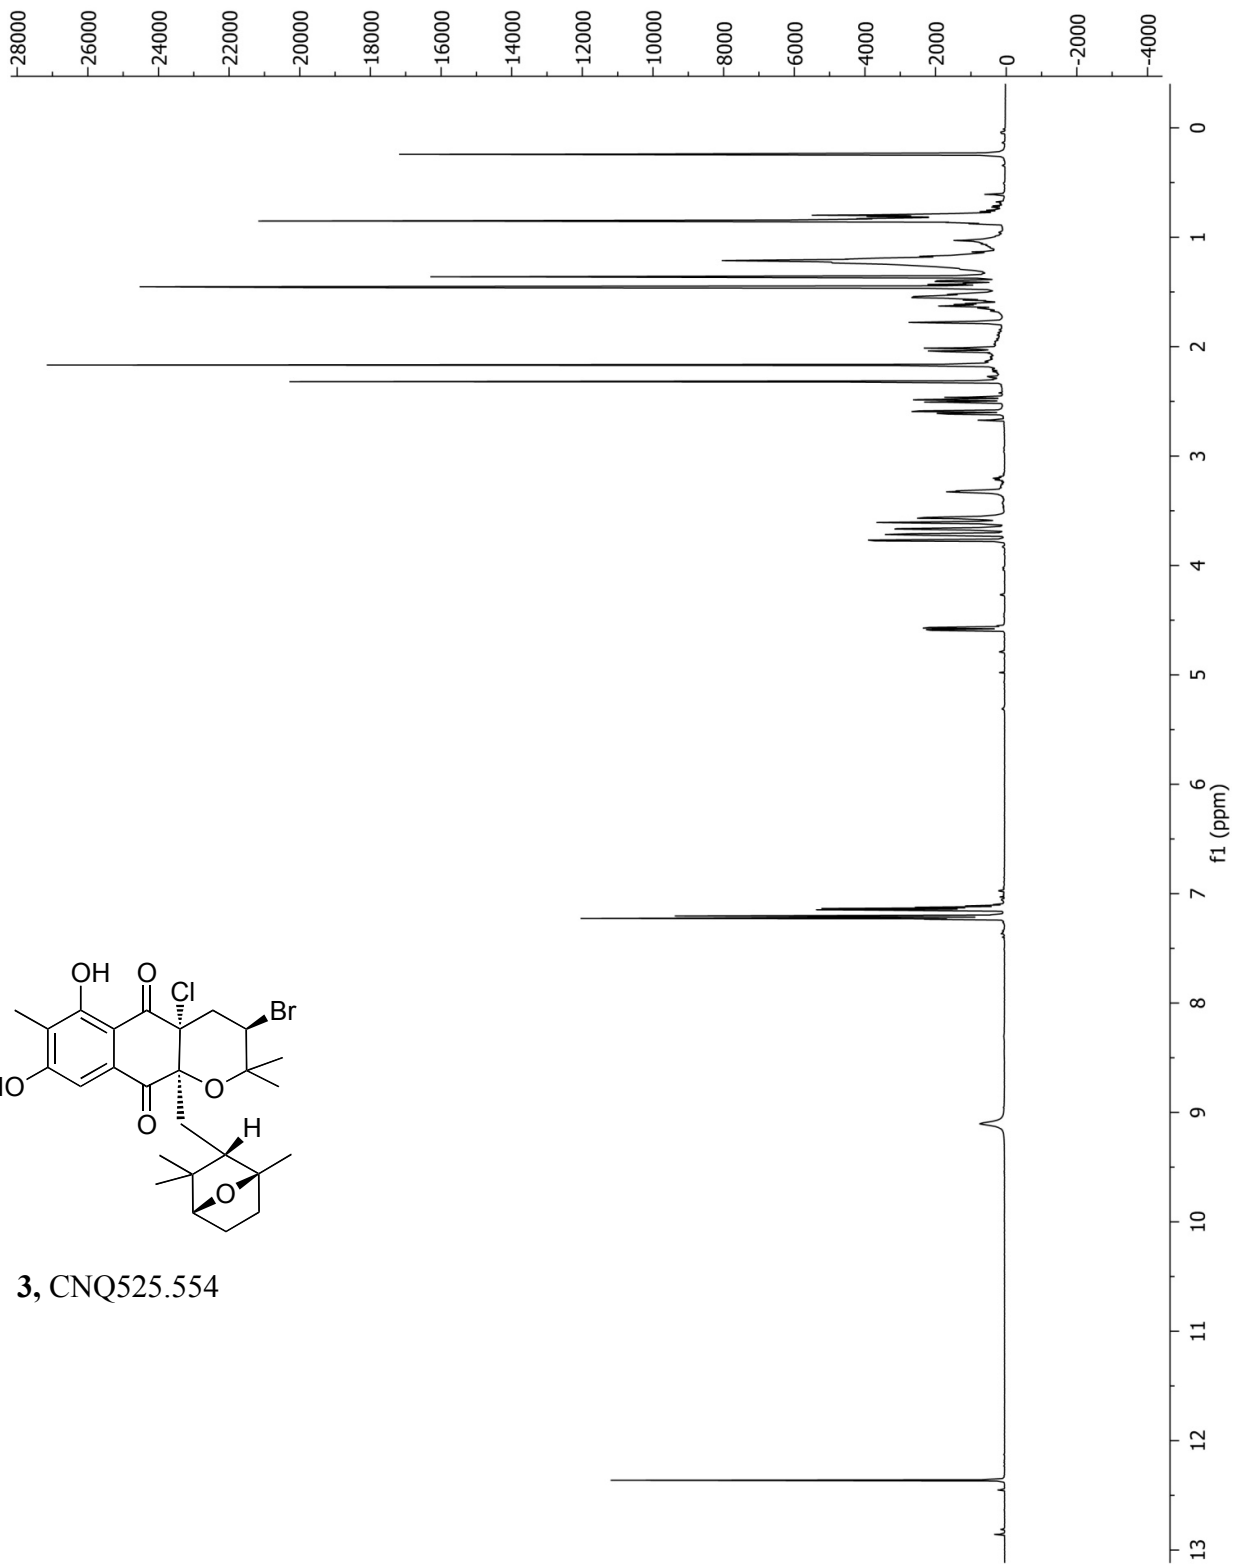

**Napyradiomycin CNQ525.554 (3)** <sup>1</sup>H NMR spectrum 500 MHz in CDCl<sub>3</sub>

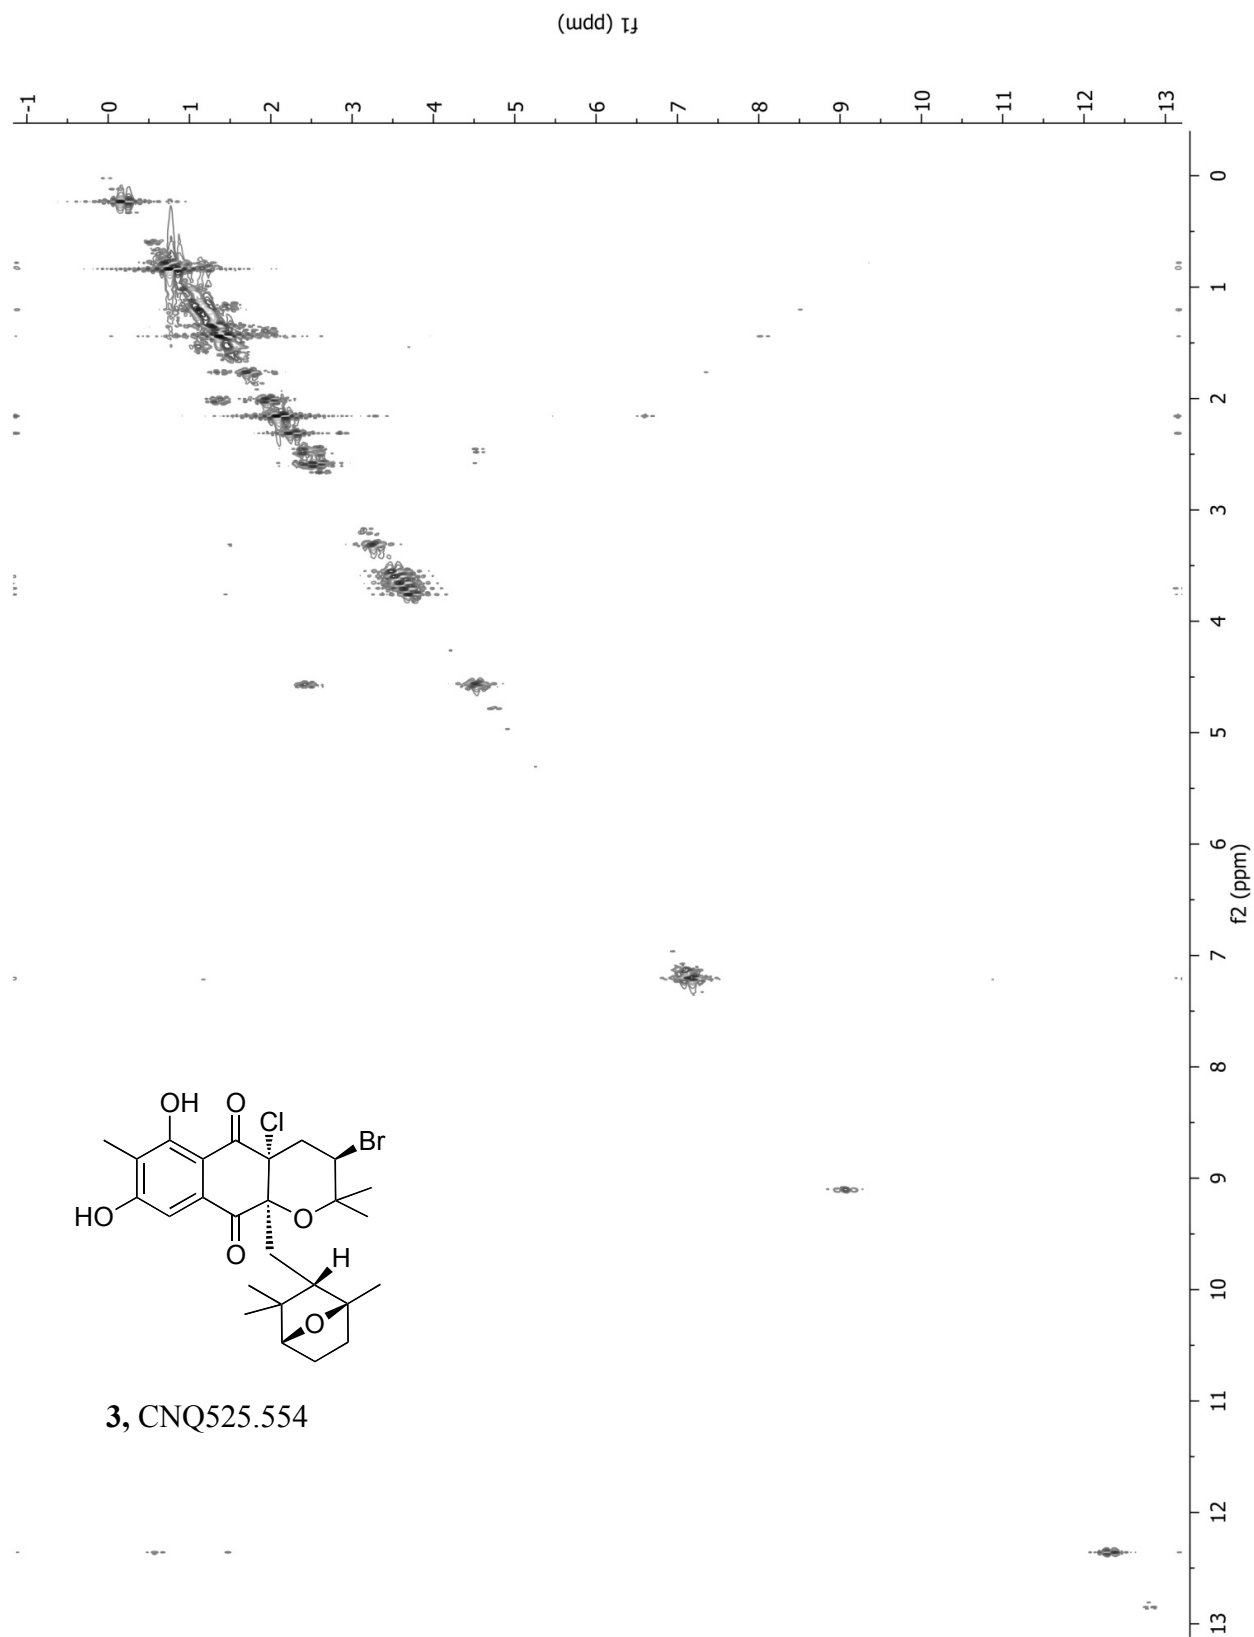



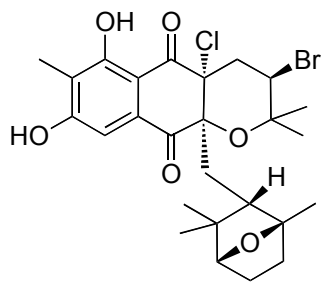

3, CNQ525.554

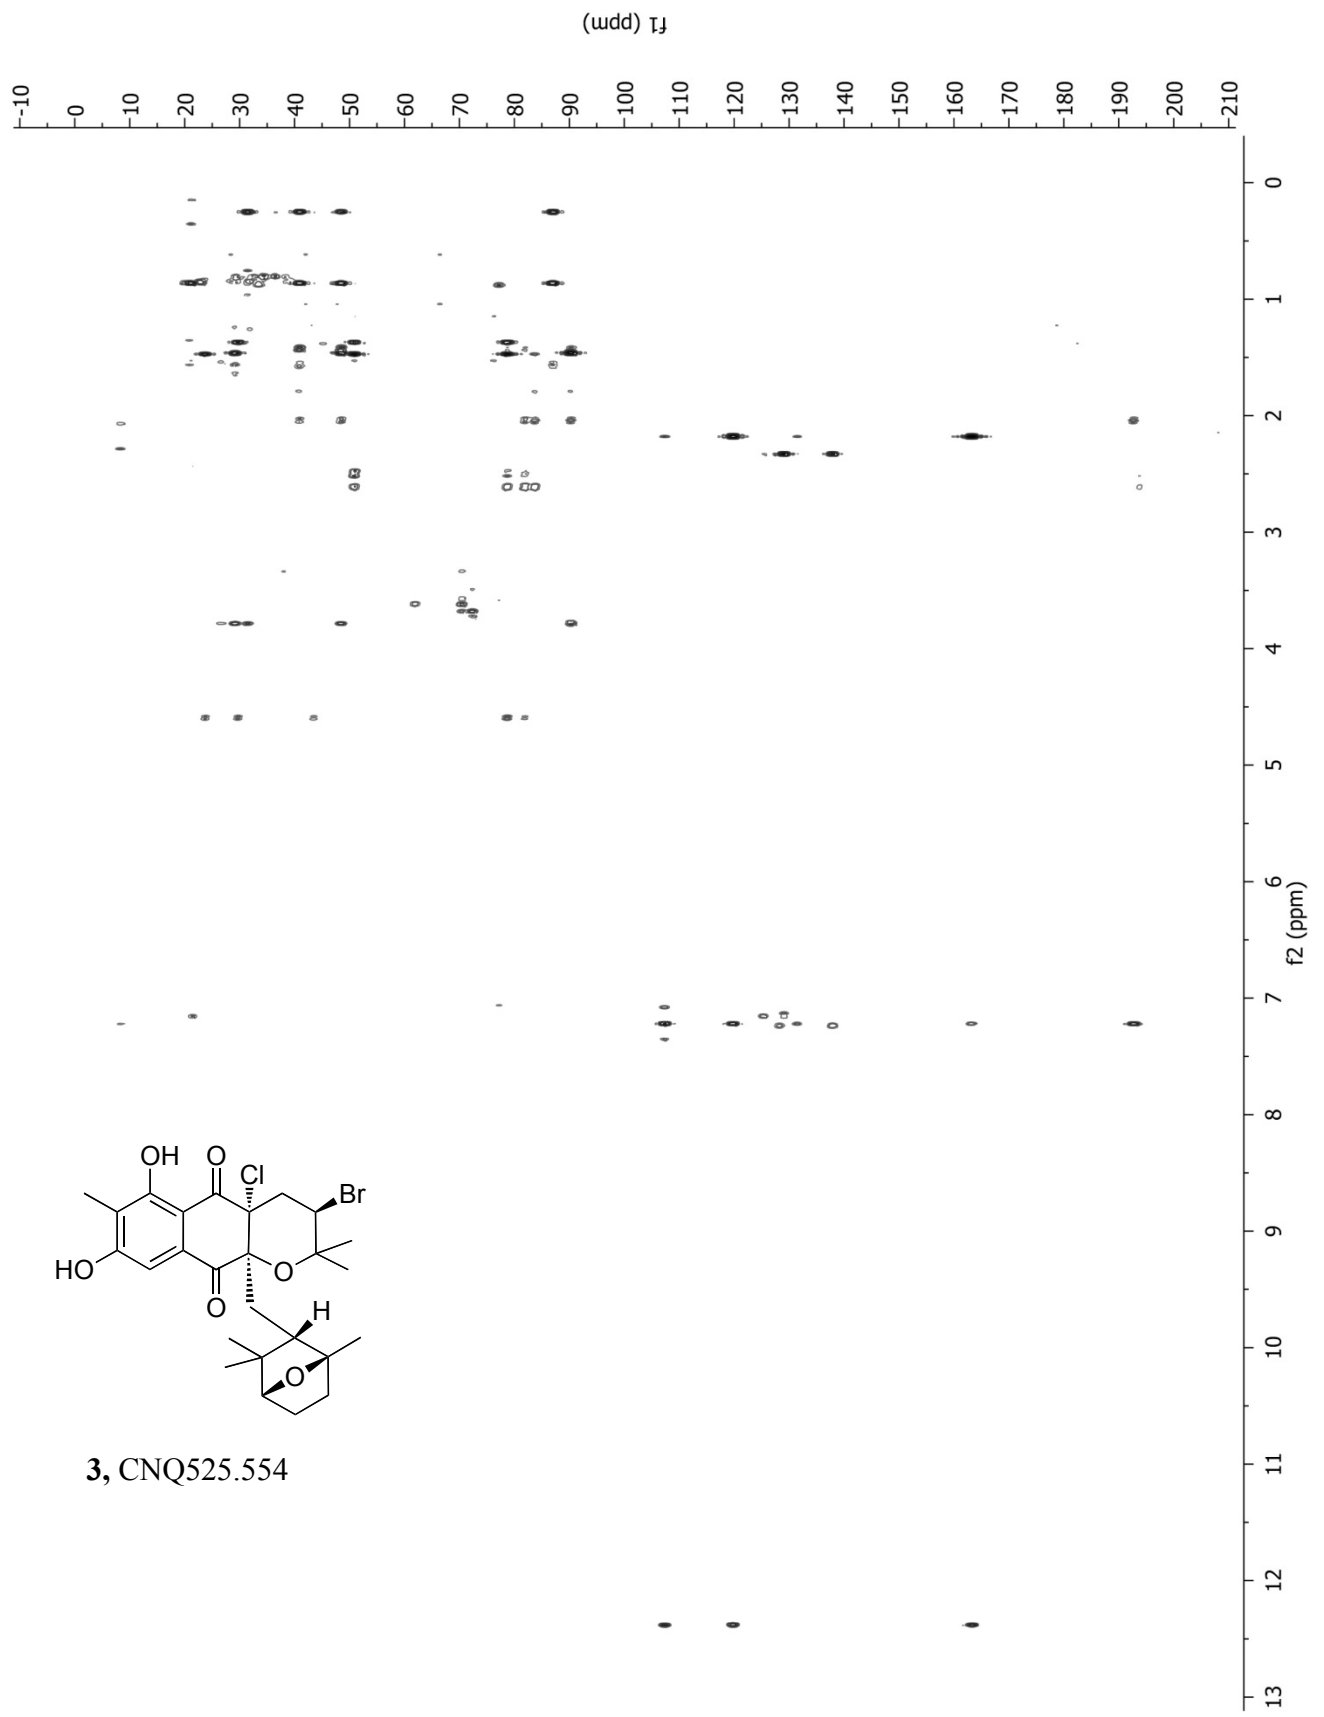

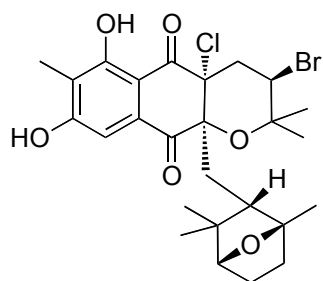

3, CNQ525.554

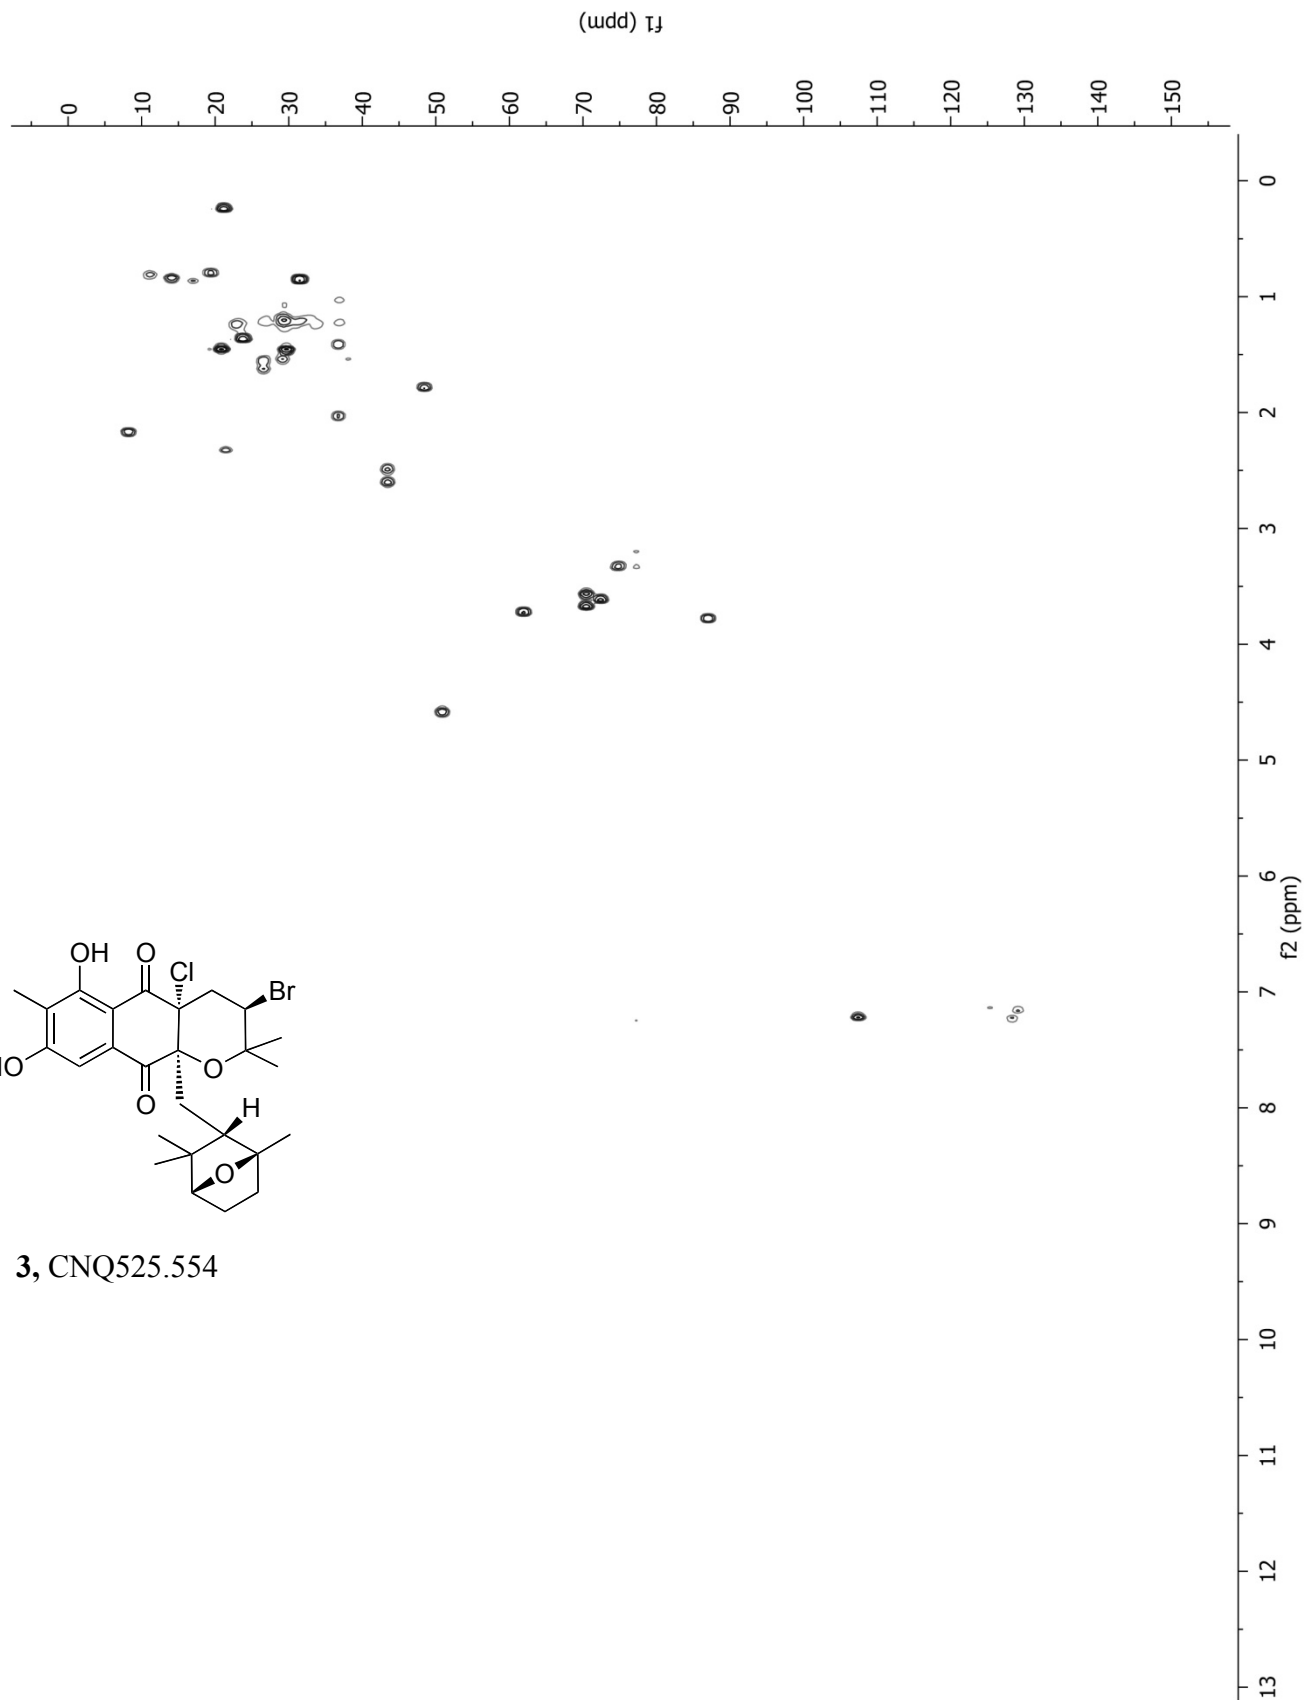

Napyradiomycin CNQ525.554 (3) HSQC NMR spectrum 500 MHz in CDCl<sub>3</sub>

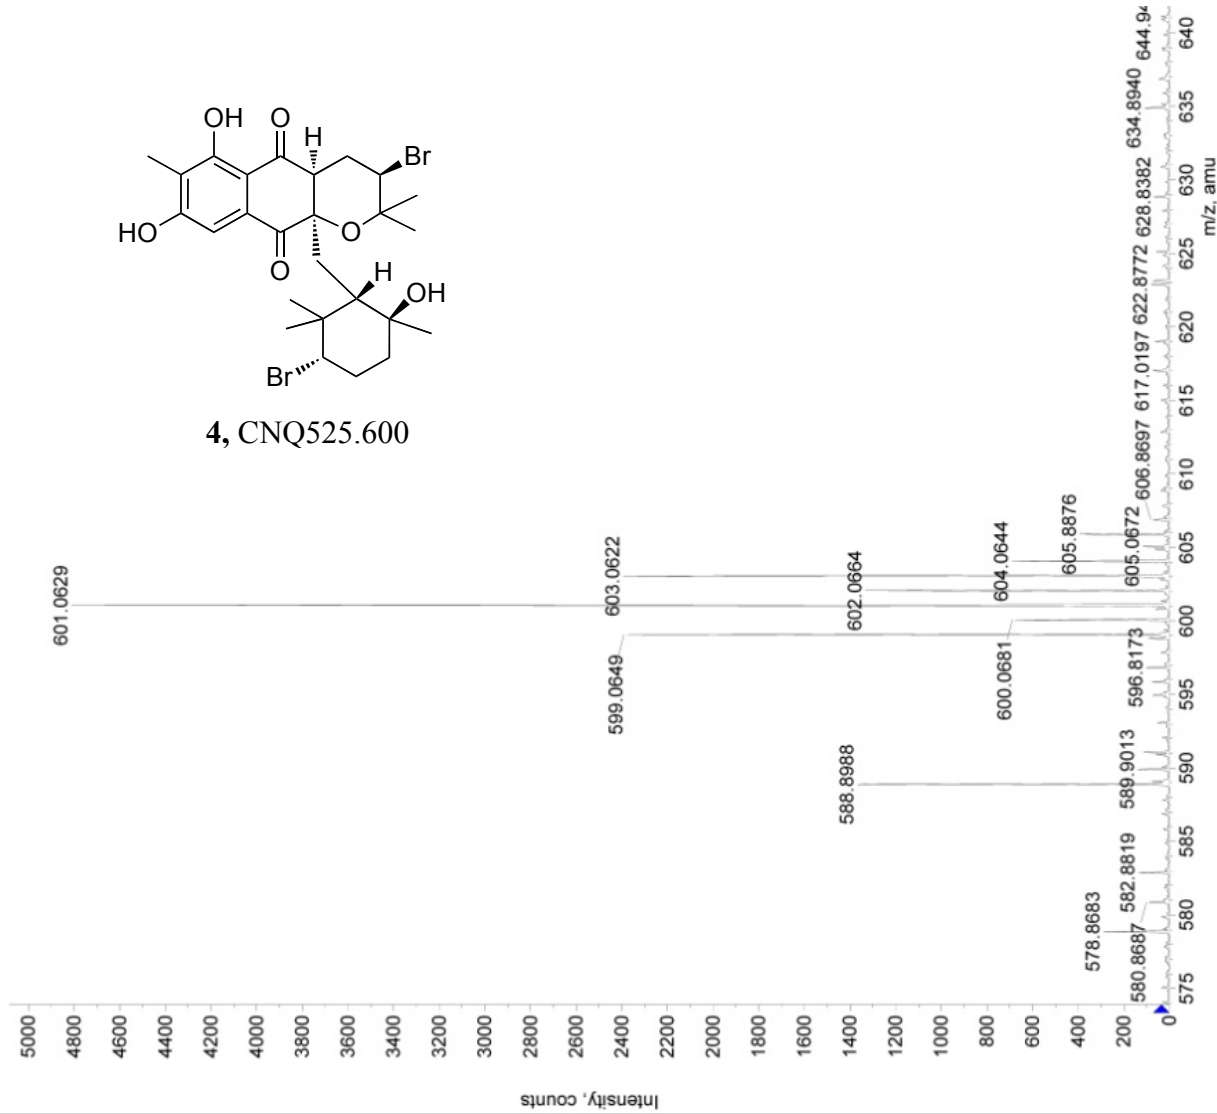

Napyradiomycin CNQ525.584 (4) HRMALDI TOF MS spectrum

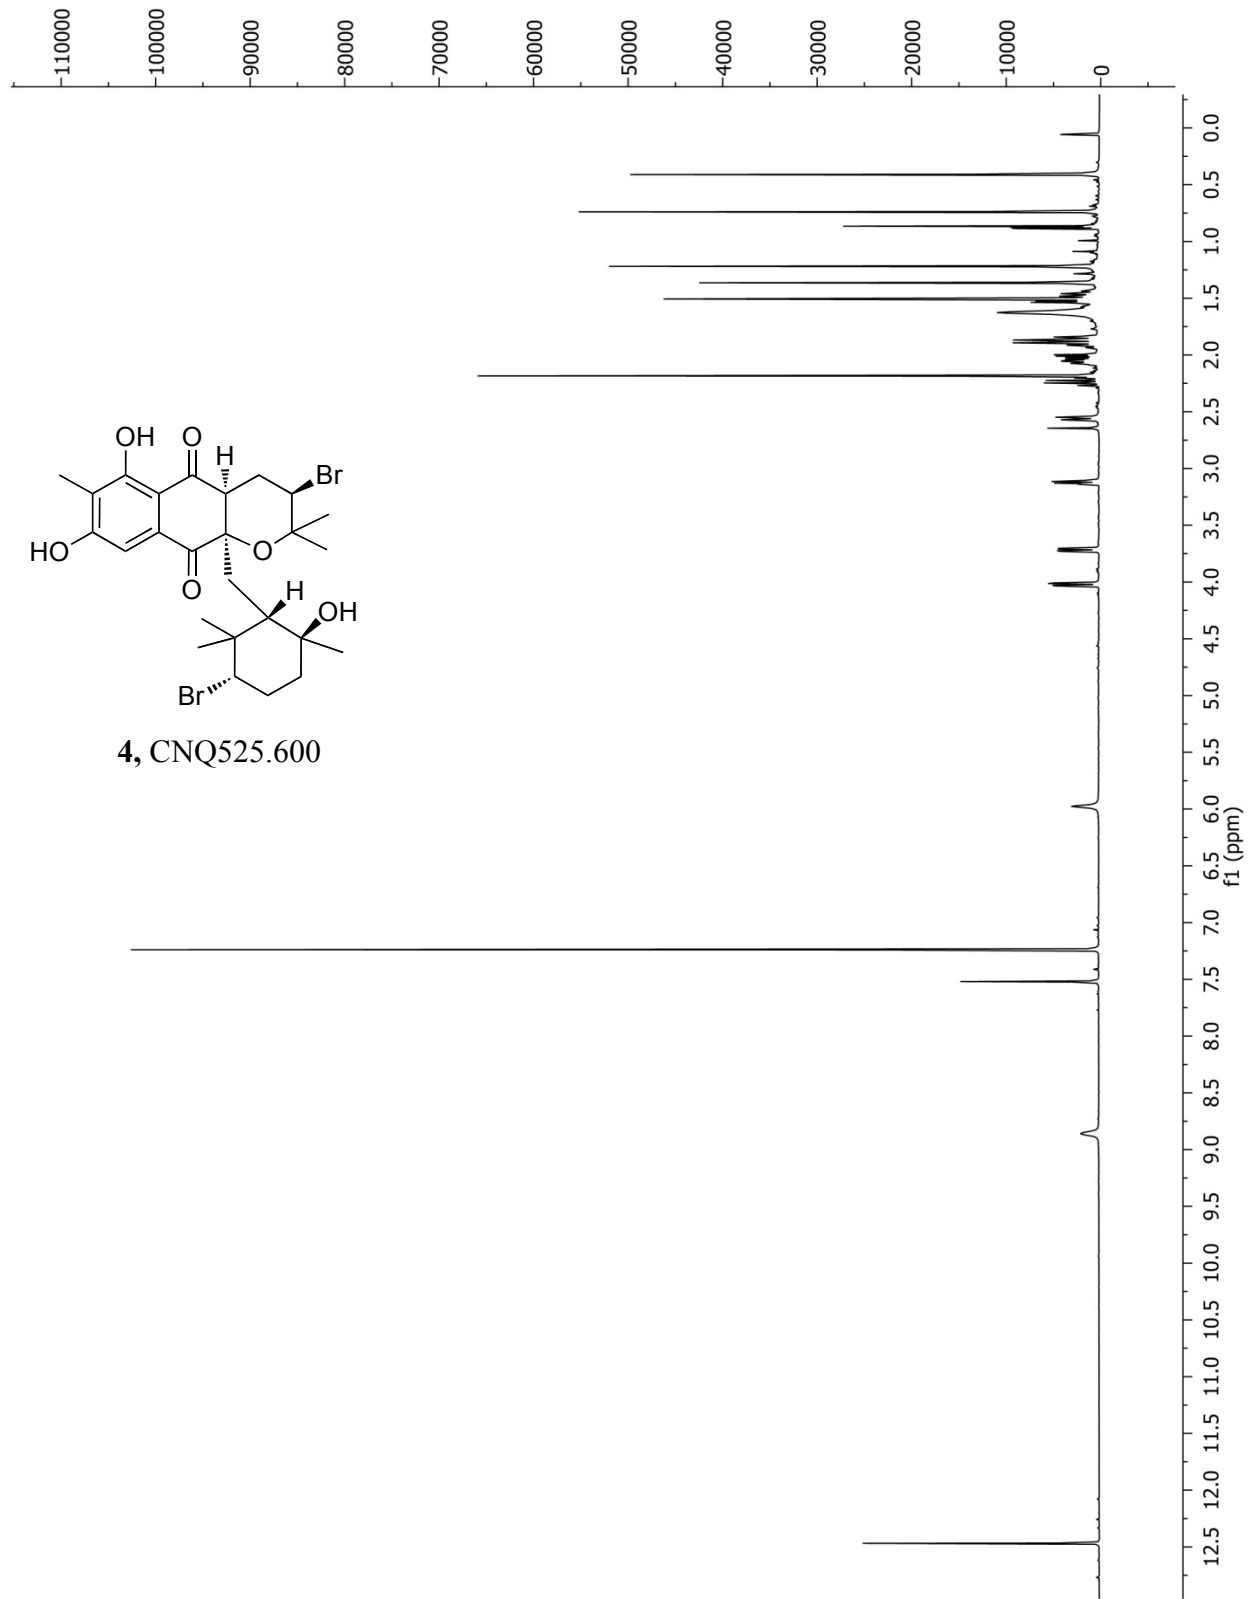

**Napyradiomycin CNQ525.584 (4)**  $^1\text{H}$  spectrum 500 MHz in  $\text{CDCl}_3$

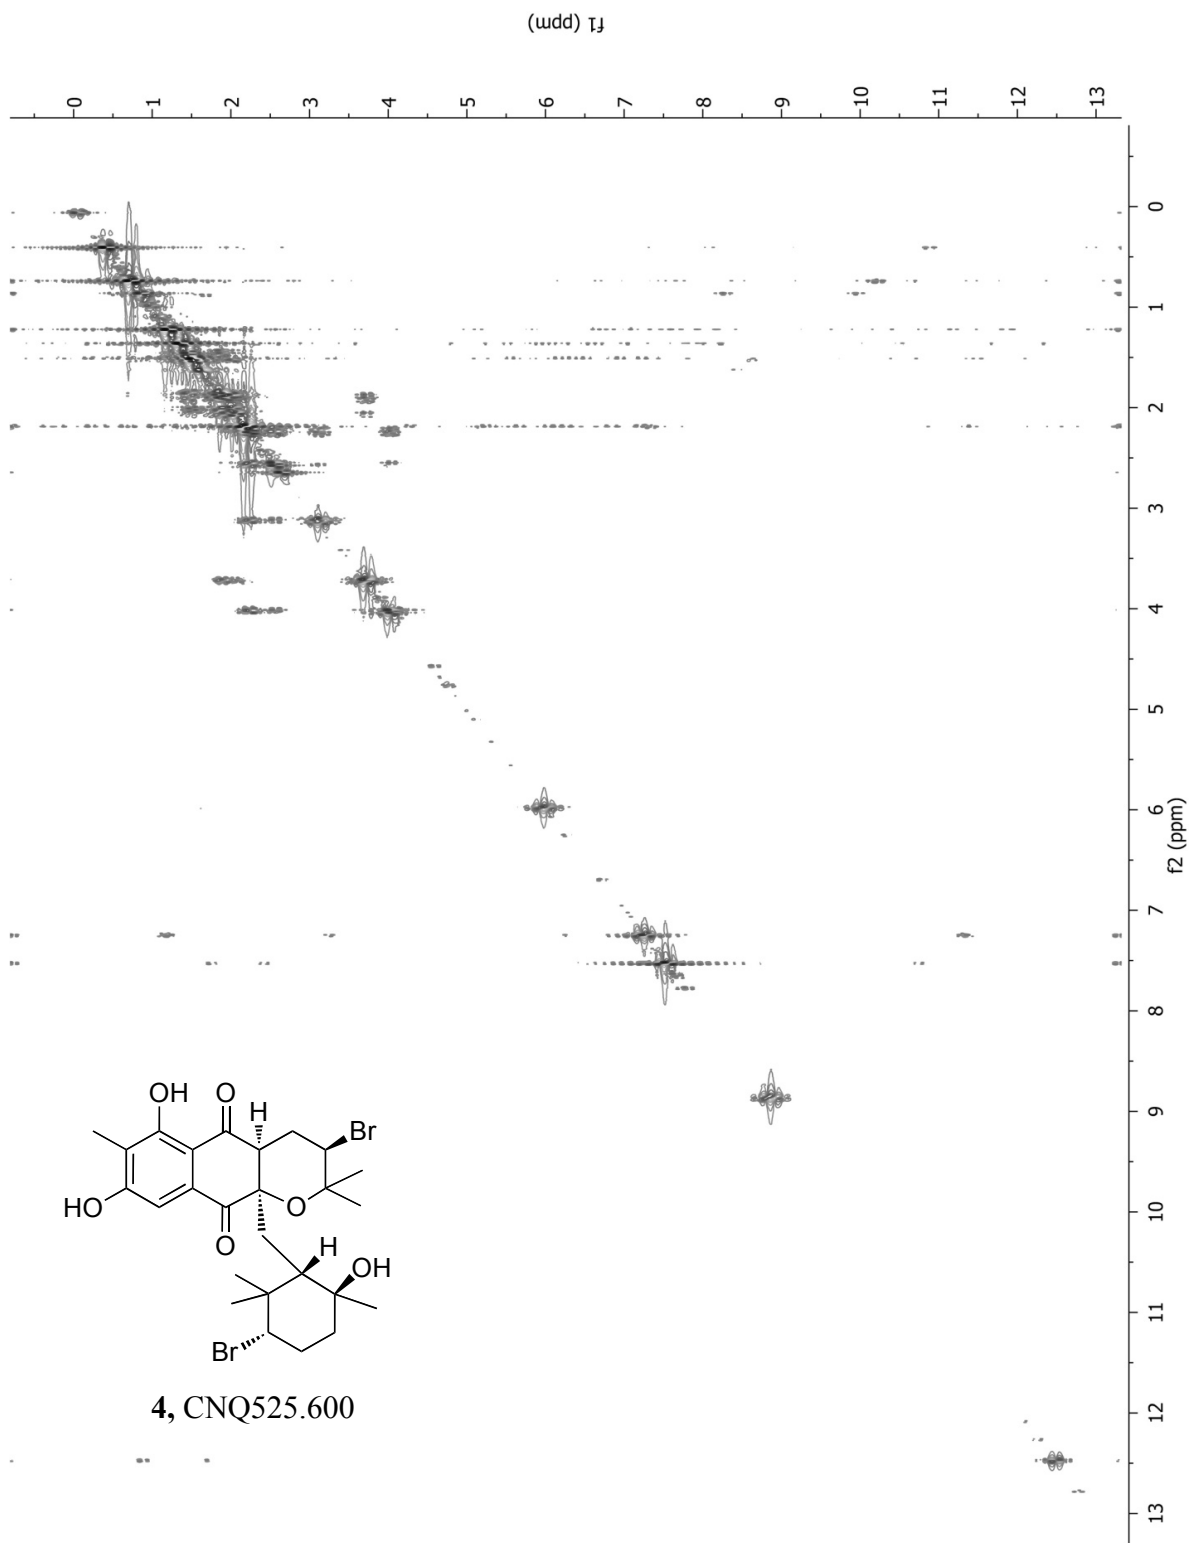

**Napyradiomycin CNQ525.584 (4) COSY NMR spectrum 500 MHz in CDCl<sub>3</sub>**

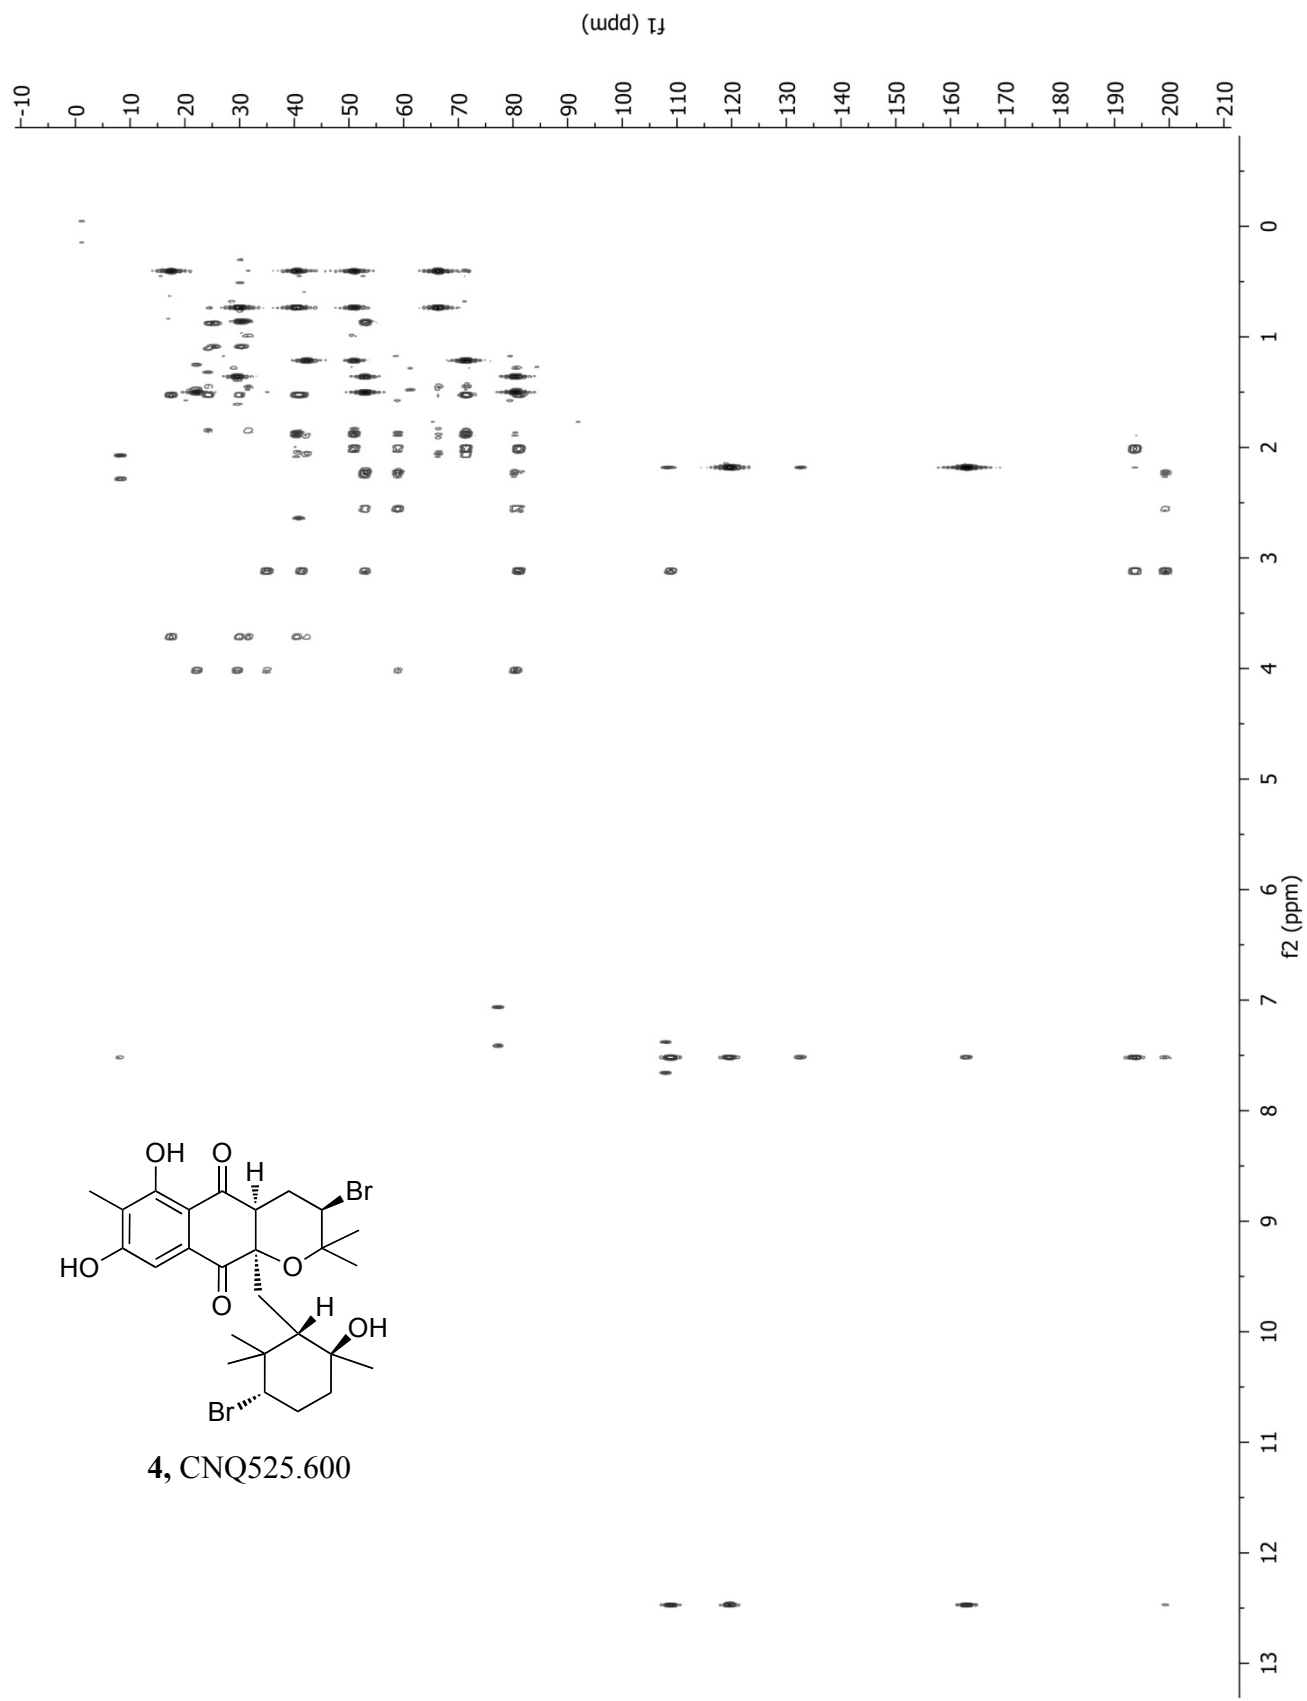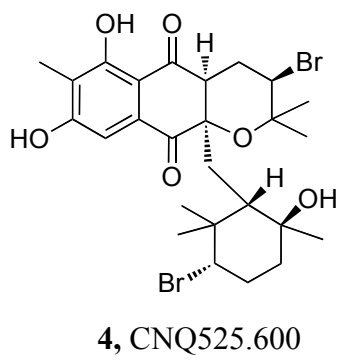

**Napyradiomycin CNQ525.584 (4) HMBC NMR spectrum 500 MHz in CDCl<sub>3</sub>**

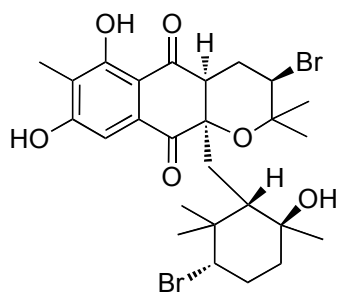

4, CNQ525.600

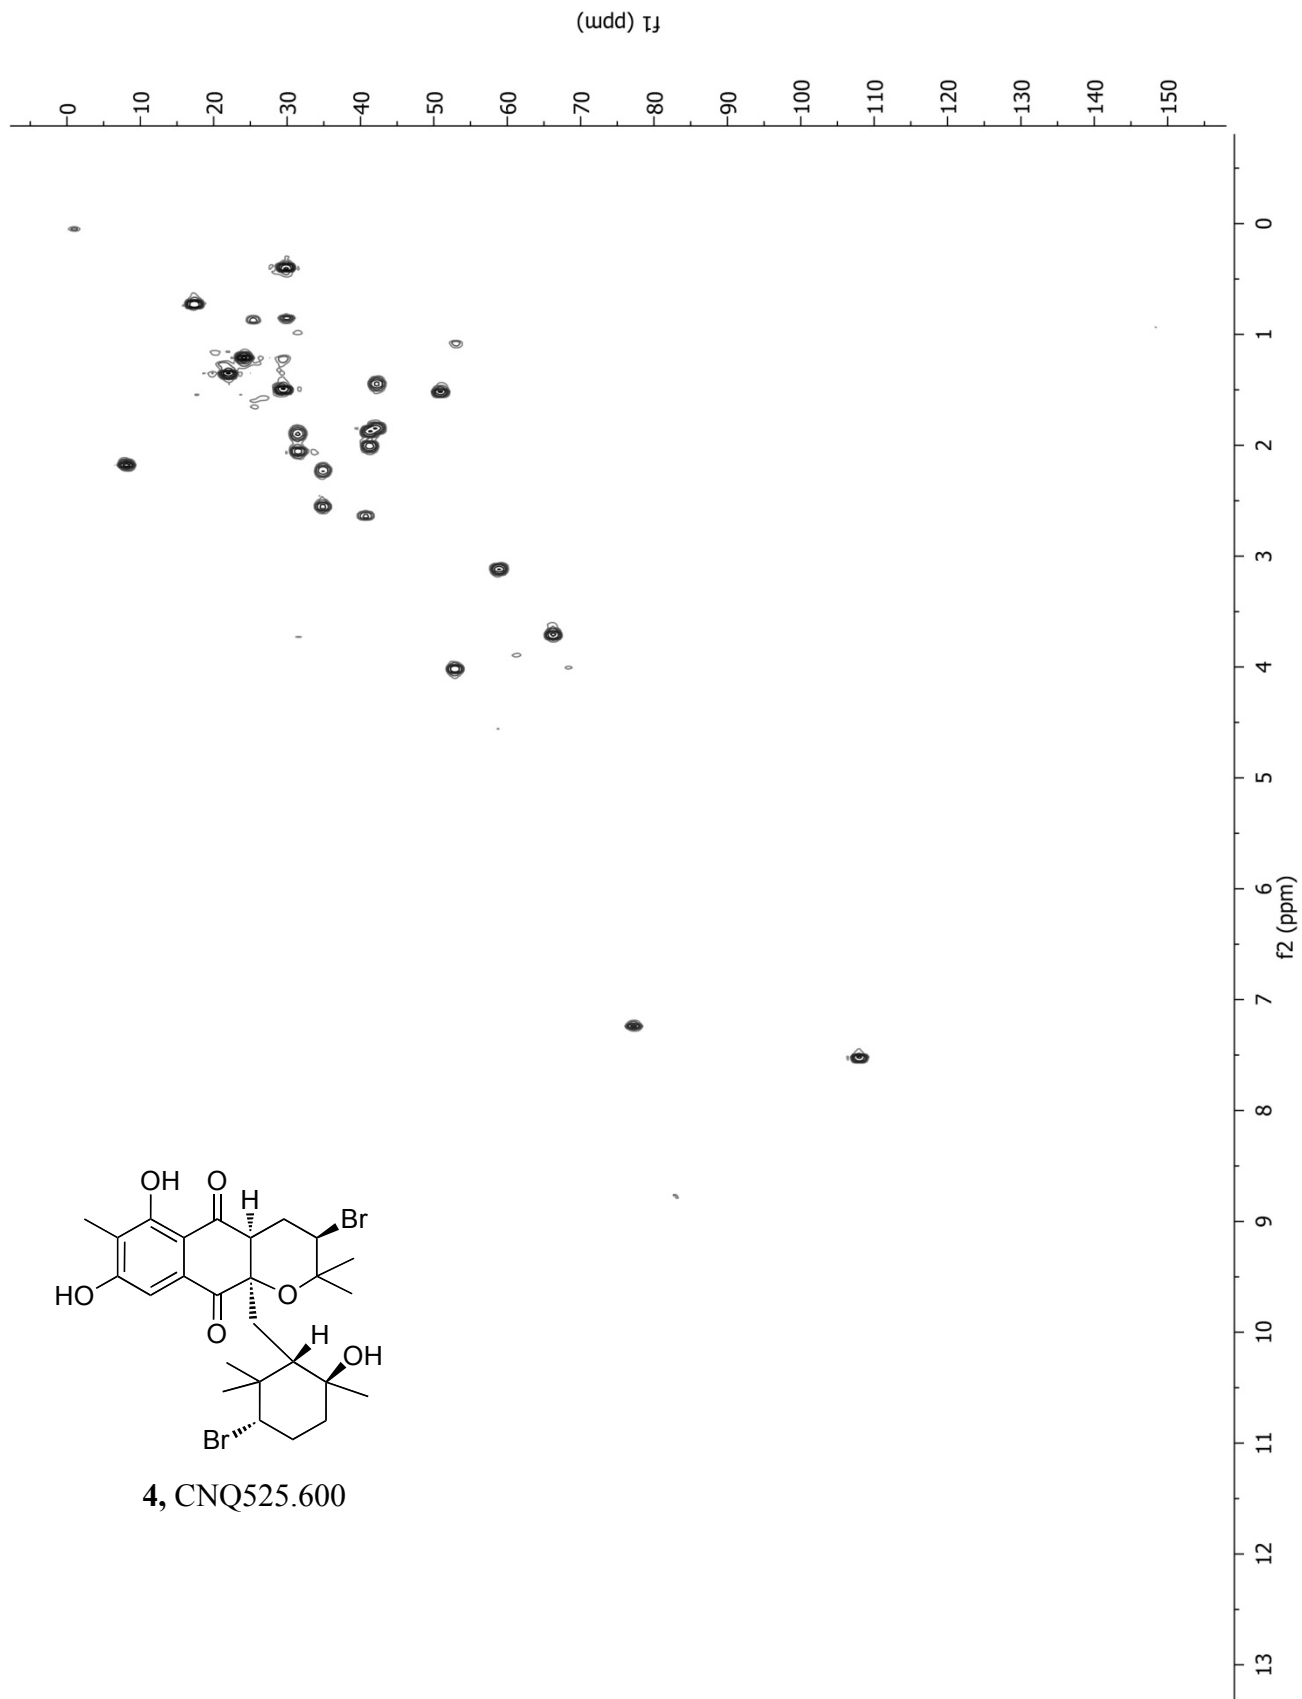

Napyradiomycin CNQ525.584 (4) HSQC NMR spectrum 500 MHz in CDCl<sub>3</sub>

University of California, San Diego  
Department of Chemistry and Biochemistry  
Small Molecule X-ray Crystallography Facility

# X-ray Crystal Structure Report

Sample ID: N16A9EI

X-ray ID: Napyradiomycin CNQ525.510B (1).

Submitted by: Lauge Farnaes

Principle Investigator: Prof. William Fenical

Report Date: August 11, 2007



**Experimental Data.** A colorless block 0.15 x 0.15 x 0.15 mm in size of napyradiomycin CNQ525.510B (**1**), was mounted on a Cryoloop with Paratone oil. Data were collected in a nitrogen gas stream at 100(2) K using phi and omega scans. Crystal-to-detector distance was 60 mm and exposure time was 5 seconds per frame using a scan width of 0.5°. Data collection was 98.2% complete to 67.00° in  $\theta$ . A total of 7887 reflections were collected covering the indices,  $-11 \leq h \leq 12$ ,  $-18 \leq k \leq 18$ ,  $-12 \leq l \leq 12$ ; 4187 reflections were found to be symmetry independent, with an  $R_{\text{int}}$  of 0.0191. Indexing and unit cell refinement indicated a primitive, monoclinic lattice. The space group was found to be P2(1) (No. 4). The data were integrated using the Bruker SAINT software program and scaled using the SADABS software program. Solution by direct methods (SIR-2004) produced a complete heavy-atom phasing model consistent with the proposed structure. All non-hydrogen atoms were refined anisotropically by full-matrix least-squares (SHELXL-97). All hydrogen atoms were placed using a riding model. Their positions were constrained relative to their parent atom using the appropriate HFIX command in SHELXL-97. Crystallographic data for napyradiomycin **2** have been deposited with the Cambridge Crystallographic Data Centre under the deposition number CCDC 944922. Copies of the data can be obtained, free of charge, on application to the Director, CCDC, 12 Union Road, Cambridge CB2 1EZ, UK (fax: +44-(0)1223-336033 or e-mail: [deposit@ccdc.cam.ac.uk](mailto:deposit@ccdc.cam.ac.uk)).

Table 1. Crystal data and structure refinement for Napyradiomycin CNQ525.510B (I).

|                                 |                                                                |                    |
|---------------------------------|----------------------------------------------------------------|--------------------|
| X-ray ID                        | fen10                                                          |                    |
| Sample/notebook ID              | N16A9EI                                                        |                    |
| Empirical formula               | C <sub>30</sub> H <sub>40</sub> Cl <sub>2</sub> O <sub>8</sub> |                    |
| Formula weight                  | 599.52                                                         |                    |
| Temperature                     | 100(2) K                                                       |                    |
| Wavelength                      | 1.54178 Å                                                      |                    |
| Crystal system                  | Monoclinic                                                     |                    |
| Space group                     | P2(1)                                                          |                    |
| Unit cell dimensions            | a = 10.2546(4) Å                                               | α = 90°.           |
|                                 | b = 15.2873(7) Å                                               | β = 117.3050(10)°. |
|                                 | c = 10.5553(5) Å                                               | γ = 90°.           |
| Volume                          | 1470.33(11) Å <sup>3</sup>                                     |                    |
| Z                               | 2                                                              |                    |
| Density (calculated)            | 1.354 Mg/m <sup>3</sup>                                        |                    |
| Absorption coefficient          | 2.399 mm <sup>-1</sup>                                         |                    |
| F(000)                          | 636                                                            |                    |
| Crystal size                    | 0.15 x 0.15 x 0.15 mm <sup>3</sup>                             |                    |
| Crystal color/habit             | colorless block                                                |                    |
| Theta range for data collection | 4.98 to 69.35°.                                                |                    |
| Index ranges                    | -11 ≤ h ≤ 12, -18 ≤ k ≤ 18, -12 ≤ l ≤ 12                       |                    |
| Reflections collected           | 7887                                                           |                    |
| Independent reflections         | 4187 [R(int) = 0.0191]                                         |                    |

|                                   |                                             |
|-----------------------------------|---------------------------------------------|
| Completeness to theta = 67.00°    | 98.2 %                                      |
| Absorption correction             | Numerical                                   |
| Max. and min. transmission        | 0.7149 and 0.7149                           |
| Refinement method                 | Full-matrix least-squares on F <sup>2</sup> |
| Data / restraints / parameters    | 4187 / 1 / 372                              |
| Goodness-of-fit on F <sup>2</sup> | 1.049                                       |
| Final R indices [I>2sigma(I)]     | R1 = 0.0253, wR2 = 0.0679                   |
| R indices (all data)              | R1 = 0.0256, wR2 = 0.0680                   |
| Absolute structure parameter      | 0.036(8)                                    |
| Extinction coefficient            | 0.0032(3)                                   |
| Largest diff. peak and hole       | 0.318 and -0.290 e.Å <sup>-3</sup>          |

Table 2. Atomic coordinates ( $\times 10^4$ ) and equivalent isotropic displacement parameters ( $\text{\AA}^2 \times 10^3$ )

for Napyradiomycin CNQ525.510B (1).  $U(\text{eq})$  is defined as one third of the trace of the orthogonalized  $U^{ij}$  tensor.

|       | x       | y       | z       | $U(\text{eq})$ |
|-------|---------|---------|---------|----------------|
| C(1)  | 4442(2) | 3928(1) | 6334(2) | 16(1)          |
| C(2)  | 3366(2) | 4705(1) | 5860(2) | 18(1)          |
| C(3)  | 3086(2) | 5160(1) | 4514(2) | 18(1)          |
| C(4)  | 1918(2) | 5730(1) | 3936(2) | 19(1)          |
| C(5)  | 1580(2) | 6152(1) | 2648(2) | 19(1)          |
| C(6)  | 2375(2) | 5990(1) | 1892(2) | 20(1)          |
| C(7)  | 3545(2) | 5398(1) | 2483(2) | 19(1)          |
| C(8)  | 3942(2) | 4982(1) | 3808(2) | 18(1)          |
| C(9)  | 5216(2) | 4416(1) | 4435(2) | 18(1)          |
| C(10) | 5722(2) | 4085(1) | 5967(2) | 19(1)          |
| C(11) | 6811(2) | 4746(1) | 7010(2) | 23(1)          |
| C(12) | 7313(2) | 4430(1) | 8536(2) | 25(1)          |
| C(13) | 6027(2) | 4318(1) | 8884(2) | 22(1)          |
| C(14) | 3524(2) | 3116(1) | 5533(2) | 18(1)          |
| C(15) | 2186(2) | 2924(1) | 5779(2) | 17(1)          |
| C(16) | 592(2)  | 3018(1) | 4489(2) | 21(1)          |
| C(17) | -47(2)  | 2108(1) | 4542(2) | 26(1)          |
| C(18) | 550(2)  | 1368(1) | 3975(2) | 32(1)          |

|       |         |         |          |       |
|-------|---------|---------|----------|-------|
| C(19) | 2153(2) | 1310(1) | 5172(2)  | 27(1) |
| C(20) | 2168(2) | 1977(1) | 6274(2)  | 21(1) |
| C(21) | 2000(2) | 6436(1) | 503(2)   | 27(1) |
| C(22) | 5363(2) | 5189(1) | 8998(2)  | 28(1) |
| C(23) | 6472(2) | 3801(1) | 10252(2) | 28(1) |
| C(24) | -288(2) | 3716(1) | 4806(2)  | 28(1) |
| C(25) | 517(2)  | 3205(1) | 3033(2)  | 26(1) |
| C(26) | 3214(2) | 1784(1) | 7800(2)  | 29(1) |
| C(27) | 5760(2) | 2271(1) | 2516(2)  | 32(1) |
| C(28) | 4167(2) | 2436(1) | 2086(2)  | 27(1) |
| C(29) | 2054(2) | 3227(1) | 498(2)   | 32(1) |
| C(30) | 1592(2) | 3793(2) | -801(2)  | 38(1) |
| O(1)  | 4976(1) | 3738(1) | 7803(1)  | 18(1) |
| O(2)  | 2676(1) | 4888(1) | 6493(1)  | 22(1) |
| O(3)  | 467(1)  | 6730(1) | 2086(1)  | 23(1) |
| O(4)  | 4283(1) | 5237(1) | 1732(1)  | 24(1) |
| O(5)  | 5946(1) | 4235(1) | 3812(1)  | 24(1) |
| O(6)  | 656(1)  | 1917(1) | 6059(1)  | 26(1) |
| O(7)  | 3493(2) | 2116(1) | 2650(2)  | 37(1) |
| O(8)  | 3585(1) | 3003(1) | 996(1)   | 29(1) |
| CI(1) | 6722(1) | 3081(1) | 6151(1)  | 22(1) |
| CI(2) | 8653(1) | 5181(1) | 9746(1)  | 37(1) |

---

Table 3. Bond lengths [ $\text{\AA}$ ] and angles [ $^\circ$ ] for Napyradiomycin **2** (CNQ525.510B).

---

|             |            |              |            |
|-------------|------------|--------------|------------|
| C(1)-O(1)   | 1.417(2)   | C(11)-C(12)  | 1.527(3)   |
| C(1)-C(2)   | 1.540(2)   | C(11)-H(11A) | 0.9900     |
| C(1)-C(10)  | 1.549(2)   | C(11)-H(11B) | 0.9900     |
| C(1)-C(14)  | 1.553(2)   | C(12)-C(13)  | 1.532(2)   |
| C(2)-O(2)   | 1.209(2)   | C(12)-Cl(2)  | 1.7972(18) |
| C(2)-C(3)   | 1.486(2)   | C(12)-H(12)  | 1.0000     |
| C(3)-C(4)   | 1.377(2)   | C(13)-O(1)   | 1.456(2)   |
| C(3)-C(8)   | 1.414(2)   | C(13)-C(23)  | 1.520(3)   |
| C(4)-C(5)   | 1.397(2)   | C(13)-C(22)  | 1.525(2)   |
| C(4)-H(4)   | 0.9500     | C(14)-C(15)  | 1.538(2)   |
| C(5)-O(3)   | 1.347(2)   | C(14)-H(14A) | 0.9900     |
| C(5)-C(6)   | 1.400(2)   | C(14)-H(14B) | 0.9900     |
| C(6)-C(7)   | 1.401(3)   | C(15)-C(20)  | 1.542(2)   |
| C(6)-C(21)  | 1.498(2)   | C(15)-C(16)  | 1.583(2)   |
| C(7)-O(4)   | 1.346(2)   | C(15)-H(15)  | 1.0000     |
| C(7)-C(8)   | 1.416(2)   | C(16)-C(25)  | 1.529(2)   |
| C(8)-C(9)   | 1.449(2)   | C(16)-C(24)  | 1.531(2)   |
| C(9)-O(5)   | 1.234(2)   | C(16)-C(17)  | 1.550(2)   |
| C(9)-C(10)  | 1.540(2)   | C(17)-O(6)   | 1.453(2)   |
| C(10)-C(11) | 1.533(2)   | C(17)-C(18)  | 1.532(3)   |
| C(10)-Cl(1) | 1.8071(17) | C(17)-H(17)  | 1.0000     |

|              |          |              |          |
|--------------|----------|--------------|----------|
| C(18)-C(19)  | 1.550(3) | C(25)-H(25B) | 0.9800   |
| C(18)-H(18A) | 0.9900   | C(25)-H(25C) | 0.9800   |
| C(18)-H(18B) | 0.9900   | C(26)-H(26A) | 0.9800   |
| C(19)-C(20)  | 1.541(2) | C(26)-H(26B) | 0.9800   |
| C(19)-H(19A) | 0.9900   | C(26)-H(26C) | 0.9800   |
| C(19)-H(19B) | 0.9900   | C(27)-C(28)  | 1.502(3) |
| C(20)-O(6)   | 1.463(2) | C(27)-H(27A) | 0.9800   |
| C(20)-C(26)  | 1.499(3) | C(27)-H(27B) | 0.9800   |
| C(21)-H(21A) | 0.9800   | C(27)-H(27C) | 0.9800   |
| C(21)-H(21B) | 0.9800   | C(28)-O(7)   | 1.204(3) |
| C(21)-H(21C) | 0.9800   | C(28)-O(8)   | 1.342(2) |
| C(22)-H(22A) | 0.9800   | C(29)-O(8)   | 1.449(2) |
| C(22)-H(22B) | 0.9800   | C(29)-C(30)  | 1.503(3) |
| C(22)-H(22C) | 0.9800   | C(29)-H(29A) | 0.9900   |
| C(23)-H(23A) | 0.9800   | C(29)-H(29B) | 0.9900   |
| C(23)-H(23B) | 0.9800   | C(30)-H(30A) | 0.9800   |
| C(23)-H(23C) | 0.9800   | C(30)-H(30B) | 0.9800   |
| C(24)-H(24A) | 0.9800   | C(30)-H(30C) | 0.9800   |
| C(24)-H(24B) | 0.9800   | O(3)-H(3)    | 0.8400   |
| C(24)-H(24C) | 0.9800   | O(4)-H(4A)   | 0.8400   |
| C(25)-H(25A) | 0.9800   |              |          |

|                  |            |                     |            |
|------------------|------------|---------------------|------------|
| O(1)-C(1)-C(2)   | 111.93(13) | O(4)-C(7)-C(8)      | 121.05(15) |
| O(1)-C(1)-C(10)  | 111.00(13) | C(6)-C(7)-C(8)      | 121.93(15) |
| C(2)-C(1)-C(10)  | 111.16(13) | C(3)-C(8)-C(7)      | 117.91(15) |
| O(1)-C(1)-C(14)  | 105.44(13) | C(3)-C(8)-C(9)      | 121.45(15) |
| C(2)-C(1)-C(14)  | 105.98(12) | C(7)-C(8)-C(9)      | 120.60(15) |
| C(10)-C(1)-C(14) | 111.09(13) | O(5)-C(9)-C(8)      | 122.09(16) |
| O(2)-C(2)-C(3)   | 120.99(15) | O(5)-C(9)-C(10)     | 119.46(15) |
| O(2)-C(2)-C(1)   | 120.82(15) | C(8)-C(9)-C(10)     | 118.32(14) |
| C(3)-C(2)-C(1)   | 117.87(13) | C(11)-C(10)-C(9)    | 108.75(13) |
| C(4)-C(3)-C(8)   | 120.83(15) | C(11)-C(10)-C(1)    | 110.20(14) |
| C(4)-C(3)-C(2)   | 117.83(15) | C(9)-C(10)-C(1)     | 113.43(13) |
| C(8)-C(3)-C(2)   | 121.26(14) | C(11)-C(10)-Cl(1)   | 107.00(11) |
| C(3)-C(4)-C(5)   | 120.00(15) | C(9)-C(10)-Cl(1)    | 107.04(11) |
| C(3)-C(4)-H(4)   | 120.0      | C(1)-C(10)-Cl(1)    | 110.18(11) |
| C(5)-C(4)-H(4)   | 120.0      | C(12)-C(11)-C(10)   | 109.30(14) |
| O(3)-C(5)-C(4)   | 120.84(15) | C(12)-C(11)-H(11A)  | 109.8      |
| O(3)-C(5)-C(6)   | 117.57(15) | C(10)-C(11)-H(11A)  | 109.8      |
| C(4)-C(5)-C(6)   | 121.59(15) | C(12)-C(11)-H(11B)  | 109.8      |
| C(5)-C(6)-C(7)   | 117.69(15) | C(10)-C(11)-H(11B)  | 109.8      |
| C(5)-C(6)-C(21)  | 121.47(16) | H(11A)-C(11)-H(11B) | 108.3      |
| C(7)-C(6)-C(21)  | 120.84(15) | C(11)-C(12)-C(13)   | 112.22(14) |
| O(4)-C(7)-C(6)   | 117.02(15) | C(11)-C(12)-Cl(2)   | 108.97(12) |



|                     |            |                     |            |
|---------------------|------------|---------------------|------------|
| C(13)-C(12)-Cl(2)   | 111.29(13) | C(25)-C(16)-C(17)   | 112.17(15) |
| C(11)-C(12)-H(12)   | 108.1      | C(24)-C(16)-C(17)   | 108.48(14) |
| C(13)-C(12)-H(12)   | 108.1      | C(25)-C(16)-C(15)   | 115.98(13) |
| Cl(2)-C(12)-H(12)   | 108.1      | C(24)-C(16)-C(15)   | 110.76(14) |
| O(1)-C(13)-C(23)    | 102.73(14) | C(17)-C(16)-C(15)   | 100.05(13) |
| O(1)-C(13)-C(22)    | 113.35(14) | O(6)-C(17)-C(18)    | 101.37(15) |
| C(23)-C(13)-C(22)   | 109.22(15) | O(6)-C(17)-C(16)    | 102.46(14) |
| O(1)-C(13)-C(12)    | 106.78(14) | C(18)-C(17)-C(16)   | 113.35(15) |
| C(23)-C(13)-C(12)   | 111.71(15) | O(6)-C(17)-H(17)    | 112.9      |
| C(22)-C(13)-C(12)   | 112.64(15) | C(18)-C(17)-H(17)   | 112.9      |
| C(15)-C(14)-C(1)    | 115.15(13) | C(16)-C(17)-H(17)   | 112.9      |
| C(15)-C(14)-H(14A)  | 108.5      | C(17)-C(18)-C(19)   | 100.88(16) |
| C(1)-C(14)-H(14A)   | 108.5      | C(17)-C(18)-H(18A)  | 111.6      |
| C(15)-C(14)-H(14B)  | 108.5      | C(19)-C(18)-H(18A)  | 111.6      |
| C(1)-C(14)-H(14B)   | 108.5      | C(17)-C(18)-H(18B)  | 111.6      |
| H(14A)-C(14)-H(14B) | 107.5      | C(19)-C(18)-H(18B)  | 111.6      |
| C(14)-C(15)-C(20)   | 112.73(13) | H(18A)-C(18)-H(18B) | 109.4      |
| C(14)-C(15)-C(16)   | 119.11(13) | C(20)-C(19)-C(18)   | 102.52(15) |
| C(20)-C(15)-C(16)   | 102.02(13) | C(20)-C(19)-H(19A)  | 111.3      |
| C(14)-C(15)-H(15)   | 107.5      | C(18)-C(19)-H(19A)  | 111.3      |
| C(20)-C(15)-H(15)   | 107.5      | C(20)-C(19)-H(19B)  | 111.3      |
| C(16)-C(15)-H(15)   | 107.5      | C(18)-C(19)-H(19B)  | 111.3      |
| C(25)-C(16)-C(24)   | 108.98(15) | H(19A)-C(19)-H(19B) | 109.2      |

|                     |            |                     |       |
|---------------------|------------|---------------------|-------|
| O(6)-C(20)-C(26)    | 109.84(14) | H(23B)-C(23)-H(23C) | 109.5 |
| O(6)-C(20)-C(19)    | 101.47(14) | C(16)-C(24)-H(24A)  | 109.5 |
| C(26)-C(20)-C(19)   | 115.79(15) | C(16)-C(24)-H(24B)  | 109.5 |
| O(6)-C(20)-C(15)    | 100.53(13) | H(24A)-C(24)-H(24B) | 109.5 |
| C(26)-C(20)-C(15)   | 115.74(15) | C(16)-C(24)-H(24C)  | 109.5 |
| C(19)-C(20)-C(15)   | 111.31(14) | H(24A)-C(24)-H(24C) | 109.5 |
| C(6)-C(21)-H(21A)   | 109.5      | H(24B)-C(24)-H(24C) | 109.5 |
| C(6)-C(21)-H(21B)   | 109.5      | C(16)-C(25)-H(25A)  | 109.5 |
| H(21A)-C(21)-H(21B) | 109.5      | C(16)-C(25)-H(25B)  | 109.5 |
| C(6)-C(21)-H(21C)   | 109.5      | H(25A)-C(25)-H(25B) | 109.5 |
| H(21A)-C(21)-H(21C) | 109.5      | C(16)-C(25)-H(25C)  | 109.5 |
| H(21B)-C(21)-H(21C) | 109.5      | H(25A)-C(25)-H(25C) | 109.5 |
| C(13)-C(22)-H(22A)  | 109.5      | H(25B)-C(25)-H(25C) | 109.5 |
| C(13)-C(22)-H(22B)  | 109.5      | C(20)-C(26)-H(26A)  | 109.5 |
| H(22A)-C(22)-H(22B) | 109.5      | C(20)-C(26)-H(26B)  | 109.5 |
| C(13)-C(22)-H(22C)  | 109.5      | H(26A)-C(26)-H(26B) | 109.5 |
| H(22A)-C(22)-H(22C) | 109.5      | C(20)-C(26)-H(26C)  | 109.5 |
| H(22B)-C(22)-H(22C) | 109.5      | H(26A)-C(26)-H(26C) | 109.5 |
| C(13)-C(23)-H(23A)  | 109.5      | H(26B)-C(26)-H(26C) | 109.5 |
| C(13)-C(23)-H(23B)  | 109.5      | C(28)-C(27)-H(27A)  | 109.5 |
| H(23A)-C(23)-H(23B) | 109.5      | C(28)-C(27)-H(27B)  | 109.5 |
| C(13)-C(23)-H(23C)  | 109.5      | H(27A)-C(27)-H(27B) | 109.5 |
| H(23A)-C(23)-H(23C) | 109.5      | C(28)-C(27)-H(27C)  | 109.5 |

|                     |            |
|---------------------|------------|
| H(27A)-C(27)-H(27C) | 109.5      |
| H(27B)-C(27)-H(27C) | 109.5      |
| O(7)-C(28)-O(8)     | 123.75(18) |
| O(7)-C(28)-C(27)    | 125.01(19) |
| O(8)-C(28)-C(27)    | 111.23(16) |
| O(8)-C(29)-C(30)    | 107.66(16) |
| O(8)-C(29)-H(29A)   | 110.2      |
| C(30)-C(29)-H(29A)  | 110.2      |
| O(8)-C(29)-H(29B)   | 110.2      |
| C(30)-C(29)-H(29B)  | 110.2      |
| H(29A)-C(29)-H(29B) | 108.5      |
| C(29)-C(30)-H(30A)  | 109.5      |
| C(29)-C(30)-H(30B)  | 109.5      |
| H(30A)-C(30)-H(30B) | 109.5      |
| C(29)-C(30)-H(30C)  | 109.5      |
| H(30A)-C(30)-H(30C) | 109.5      |
| H(30B)-C(30)-H(30C) | 109.5      |
| C(1)-O(1)-C(13)     | 120.62(13) |
| C(5)-O(3)-H(3)      | 109.5      |
| C(7)-O(4)-H(4A)     | 109.5      |
| C(17)-O(6)-C(20)    | 96.49(12)  |
| C(28)-O(8)-C(29)    | 116.48(15) |

---

Symmetry transformations used to generate equivalent atoms:

Table 4. Anisotropic displacement parameters ( $\text{\AA}^2 \times 10^3$ ) for Napyradiomycin CNQ525.510B (1). The anisotropic displacement factor exponent takes the form:  $-2\pi^2 [ h^2 a^{*2} U^{11} + \dots + 2 h k a^* b^* U^{12} ]$

|       | $U^{11}$ | $U^{22}$ | $U^{33}$ | $U^{23}$ | $U^{13}$ | $U^{12}$ |
|-------|----------|----------|----------|----------|----------|----------|
| C(1)  | 16(1)    | 18(1)    | 15(1)    | 0(1)     | 7(1)     | 1(1)     |
| C(2)  | 18(1)    | 18(1)    | 17(1)    | -2(1)    | 7(1)     | -1(1)    |
| C(3)  | 18(1)    | 18(1)    | 17(1)    | -2(1)    | 8(1)     | -2(1)    |
| C(4)  | 22(1)    | 18(1)    | 20(1)    | -1(1)    | 11(1)    | 0(1)     |
| C(5)  | 17(1)    | 16(1)    | 19(1)    | -1(1)    | 6(1)     | -2(1)    |
| C(6)  | 21(1)    | 22(1)    | 17(1)    | -1(1)    | 8(1)     | -5(1)    |
| C(7)  | 21(1)    | 21(1)    | 18(1)    | -2(1)    | 11(1)    | -4(1)    |
| C(8)  | 19(1)    | 19(1)    | 17(1)    | -2(1)    | 9(1)     | -2(1)    |
| C(9)  | 18(1)    | 18(1)    | 20(1)    | 0(1)     | 10(1)    | -2(1)    |
| C(10) | 18(1)    | 19(1)    | 20(1)    | 1(1)     | 9(1)     | 2(1)     |
| C(11) | 21(1)    | 25(1)    | 21(1)    | 0(1)     | 10(1)    | -4(1)    |
| C(12) | 20(1)    | 29(1)    | 20(1)    | -2(1)    | 5(1)     | -4(1)    |
| C(13) | 22(1)    | 24(1)    | 16(1)    | -3(1)    | 6(1)     | -3(1)    |
| C(14) | 18(1)    | 19(1)    | 18(1)    | -1(1)    | 10(1)    | 0(1)     |
| C(15) | 18(1)    | 19(1)    | 16(1)    | 1(1)     | 10(1)    | -1(1)    |
| C(16) | 19(1)    | 25(1)    | 19(1)    | 4(1)     | 8(1)     | 0(1)     |
| C(17) | 21(1)    | 30(1)    | 23(1)    | 1(1)     | 6(1)     | -7(1)    |
| C(18) | 36(1)    | 26(1)    | 30(1)    | -3(1)    | 11(1)    | -9(1)    |

|       |       |       |       |       |       |        |
|-------|-------|-------|-------|-------|-------|--------|
| C(19) | 31(1) | 21(1) | 29(1) | -2(1) | 14(1) | -4(1)  |
| C(20) | 20(1) | 23(1) | 22(1) | 3(1)  | 11(1) | -1(1)  |
| C(21) | 29(1) | 31(1) | 23(1) | 8(1)  | 13(1) | 2(1)   |
| C(22) | 33(1) | 27(1) | 21(1) | -6(1) | 10(1) | 0(1)   |
| C(23) | 26(1) | 35(1) | 18(1) | 4(1)  | 6(1)  | 0(1)   |
| C(24) | 20(1) | 33(1) | 32(1) | 2(1)  | 11(1) | 4(1)   |
| C(25) | 23(1) | 34(1) | 19(1) | 6(1)  | 7(1)  | 1(1)   |
| C(26) | 32(1) | 30(1) | 23(1) | 6(1)  | 12(1) | 5(1)   |
| C(27) | 33(1) | 25(1) | 36(1) | -1(1) | 14(1) | -1(1)  |
| C(28) | 37(1) | 24(1) | 22(1) | -6(1) | 15(1) | -4(1)  |
| C(29) | 28(1) | 41(1) | 29(1) | -3(1) | 15(1) | -1(1)  |
| C(30) | 37(1) | 50(1) | 31(1) | 2(1)  | 18(1) | 9(1)   |
| O(1)  | 19(1) | 20(1) | 14(1) | 1(1)  | 6(1)  | -1(1)  |
| O(2)  | 25(1) | 24(1) | 20(1) | 1(1)  | 13(1) | 4(1)   |
| O(3)  | 22(1) | 23(1) | 22(1) | 3(1)  | 8(1)  | 4(1)   |
| O(4)  | 27(1) | 30(1) | 23(1) | 4(1)  | 16(1) | 3(1)   |
| O(5)  | 24(1) | 27(1) | 26(1) | 2(1)  | 16(1) | 3(1)   |
| O(6)  | 23(1) | 30(1) | 25(1) | 6(1)  | 13(1) | -4(1)  |
| O(7)  | 45(1) | 38(1) | 38(1) | 3(1)  | 27(1) | 0(1)   |
| O(8)  | 28(1) | 36(1) | 25(1) | 1(1)  | 14(1) | -3(1)  |
| Cl(1) | 20(1) | 23(1) | 27(1) | 3(1)  | 13(1) | 5(1)   |
| Cl(2) | 31(1) | 48(1) | 26(1) | -8(1) | 6(1)  | -18(1) |

---

Table 5. Hydrogen coordinates ( $\times 10^4$ ) and isotropic displacement parameters ( $\text{\AA}^2 \times 10^3$ ) for Napradiomycin **2** (CNQ525.510A).

|        | x     | y    | z    | U(eq) |
|--------|-------|------|------|-------|
| H(4)   | 1342  | 5836 | 4413 | 23    |
| H(11A) | 7669  | 4806 | 6823 | 27    |
| H(11B) | 6336  | 5326 | 6876 | 27    |
| H(12)  | 7797  | 3848 | 8643 | 30    |
| H(14A) | 3180  | 3200 | 4498 | 21    |
| H(14B) | 4174  | 2596 | 5829 | 21    |
| H(15)  | 2244  | 3322 | 6555 | 21    |
| H(17)  | -1143 | 2108 | 4109 | 31    |
| H(18A) | 510   | 1523 | 3047 | 39    |
| H(18B) | 12    | 815  | 3876 | 39    |
| H(19A) | 2386  | 714  | 5582 | 32    |
| H(19B) | 2860  | 1475 | 4816 | 32    |
| H(21A) | 1272  | 6895 | 337  | 41    |
| H(21B) | 1595  | 6007 | -273 | 41    |
| H(21C) | 2888  | 6697 | 536  | 41    |
| H(22A) | 5135  | 5540 | 8145 | 42    |
| H(22B) | 6067  | 5505 | 9844 | 42    |

|        |       |      |       |    |
|--------|-------|------|-------|----|
| H(22C) | 4462  | 5082 | 9078  | 42 |
| H(23A) | 5610  | 3708 | 10407 | 42 |
| H(23B) | 7217  | 4128 | 11057 | 42 |
| H(23C) | 6875  | 3234 | 10173 | 42 |
| H(24A) | 193   | 4286 | 4920  | 42 |
| H(24B) | -336  | 3565 | 5685  | 42 |
| H(24C) | -1284 | 3745 | 4014  | 42 |
| H(25A) | -500  | 3148 | 2289  | 40 |
| H(25B) | 1136  | 2787 | 2854  | 40 |
| H(25C) | 865   | 3801 | 3024  | 40 |
| H(26A) | 3077  | 2213 | 8418  | 43 |
| H(26B) | 4224  | 1817 | 7934  | 43 |
| H(26C) | 3025  | 1195 | 8045  | 43 |
| H(27A) | 6139  | 1826 | 3268  | 48 |
| H(27B) | 6315  | 2814 | 2872  | 48 |
| H(27C) | 5865  | 2064 | 1688  | 48 |
| H(29A) | 1927  | 3546 | 1250  | 38 |
| H(29B) | 1448  | 2690 | 256   | 38 |
| H(30A) | 2234  | 4307 | -562  | 57 |
| H(30B) | 575   | 3984 | -1130 | 57 |
| H(30C) | 1666  | 3459 | -1558 | 57 |
| H(3)   | -287  | 6478 | 1472  | 34 |
| H(4A)  | 4929  | 4856 | 2154  | 37 |

---



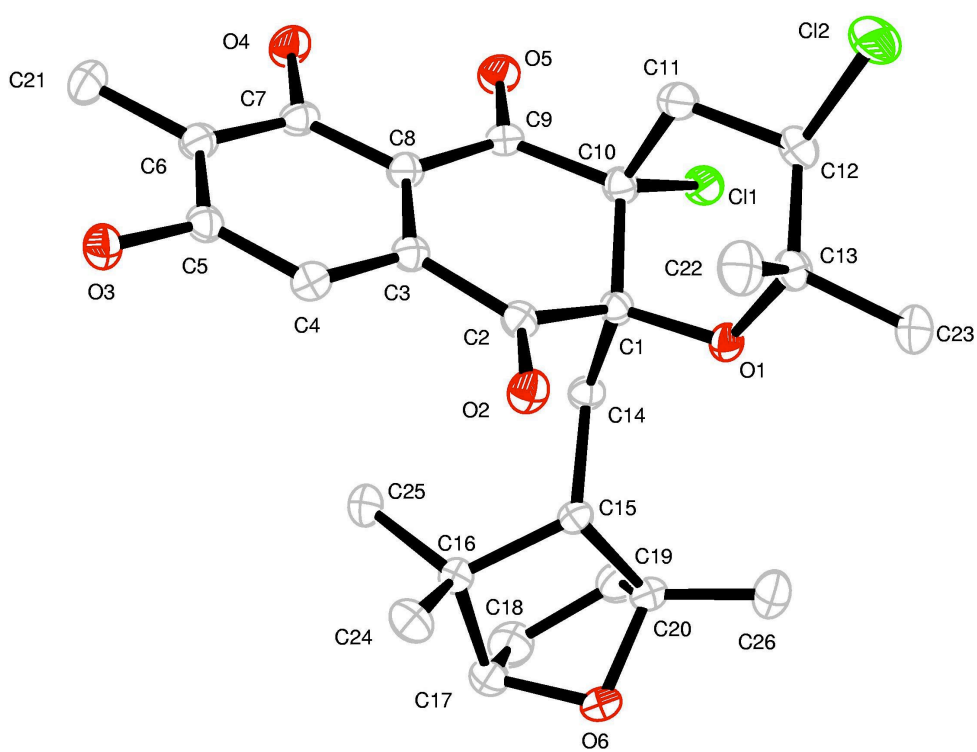

X-Ray computer drawing of the final structure of napyradiomycin CNQ525.510B (**1**), illustrating its absolute configuration.

## Raw FACS Data for Four Napyradiomycin Derivatives

DMSO and Camptothecin (10  $\mu$ M) Controls

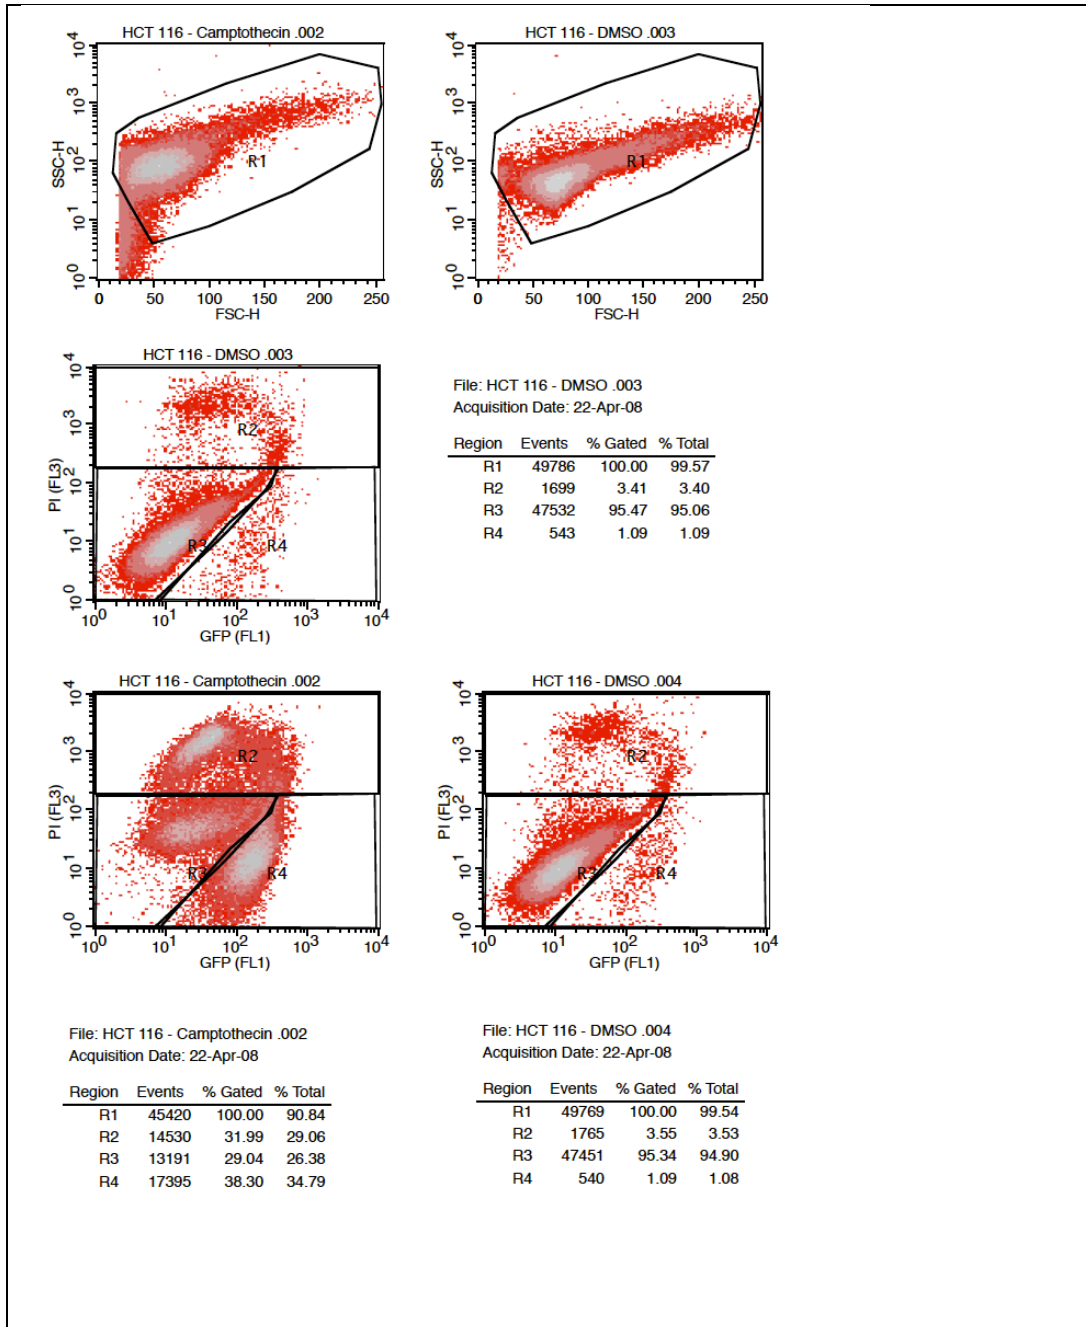

DMSO Only and No Treatment data and Napradiomycin A80195B at 0.5 µg/mL

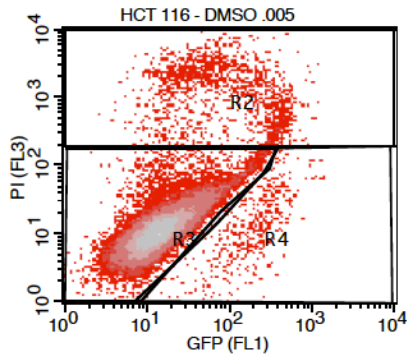

File: HCT 116 - DMSO .005  
Acquisition Date: 22-Apr-08

| Region | Events | % Gated | % Total |
|--------|--------|---------|---------|
| R1     | 49779  | 100.00  | 99.56   |
| R2     | 1618   | 3.25    | 3.24    |
| R3     | 47711  | 95.85   | 95.42   |
| R4     | 423    | 0.85    | 0.85    |

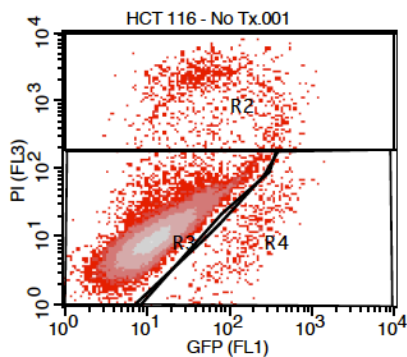

File: HCT 116 - No Tx.001  
Acquisition Date: 22-Apr-08

| Region | Events | % Gated | % Total |
|--------|--------|---------|---------|
| R1     | 49787  | 100.00  | 99.57   |
| R2     | 898    | 1.80    | 1.80    |
| R3     | 48481  | 97.38   | 96.96   |
| R4     | 393    | 0.79    | 0.79    |

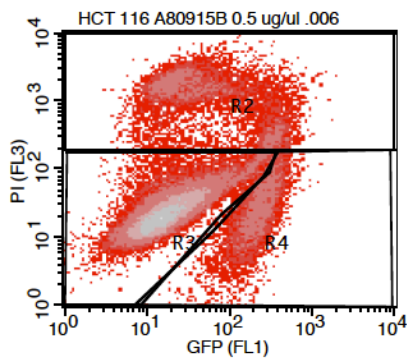

File: HCT 116 A80915B 0.5 ug/ul .006  
Acquisition Date: 22-Apr-08

| Region | Events | % Gated | % Total |
|--------|--------|---------|---------|
| R1     | 49385  | 100.00  | 98.77   |
| R2     | 9020   | 18.26   | 18.04   |
| R3     | 34157  | 69.16   | 68.31   |
| R4     | 6171   | 12.50   | 12.34   |

File: HCT 116 A80915B 0.5 ug/ul .007  
Acquisition Date: 22-Apr-08

| Region | Events | % Gated | % Total |
|--------|--------|---------|---------|
| R1     | 49556  | 100.00  | 99.11   |
| R2     | 4903   | 9.89    | 9.81    |
| R3     | 41131  | 83.00   | 82.26   |
| R4     | 3483   | 7.03    | 6.97    |

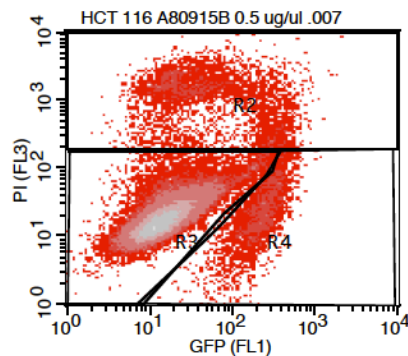

Napyradiomycin A80915B at 0.5 and 1.0  $\mu\text{g}/\text{mL}$

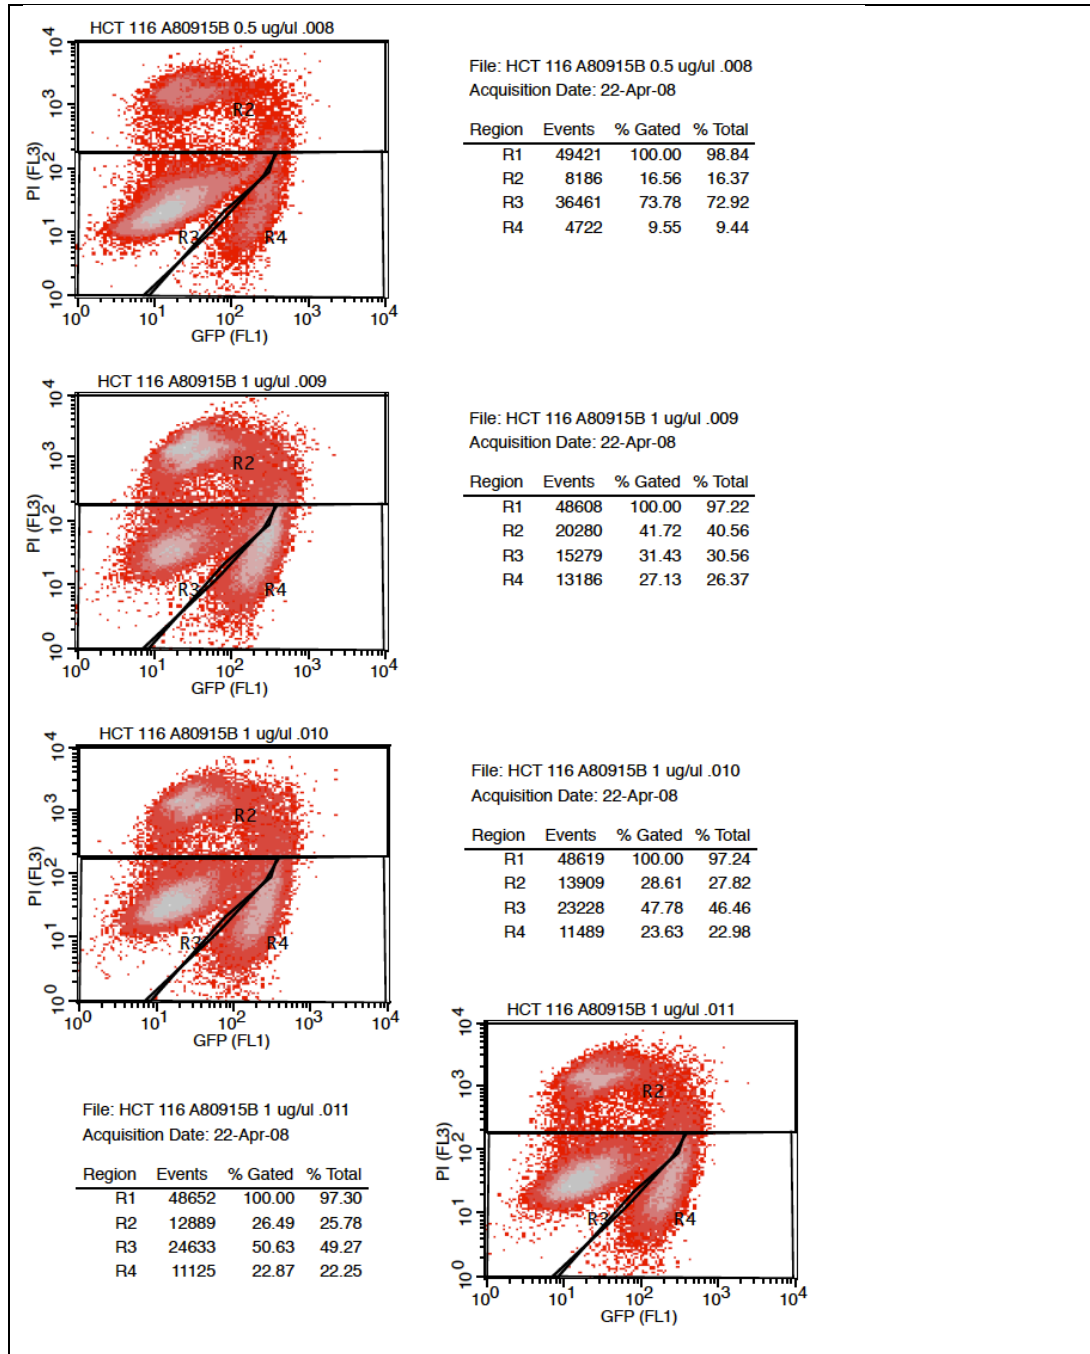

Napyradiomycin A80195B at 2 and 16 µg/mL

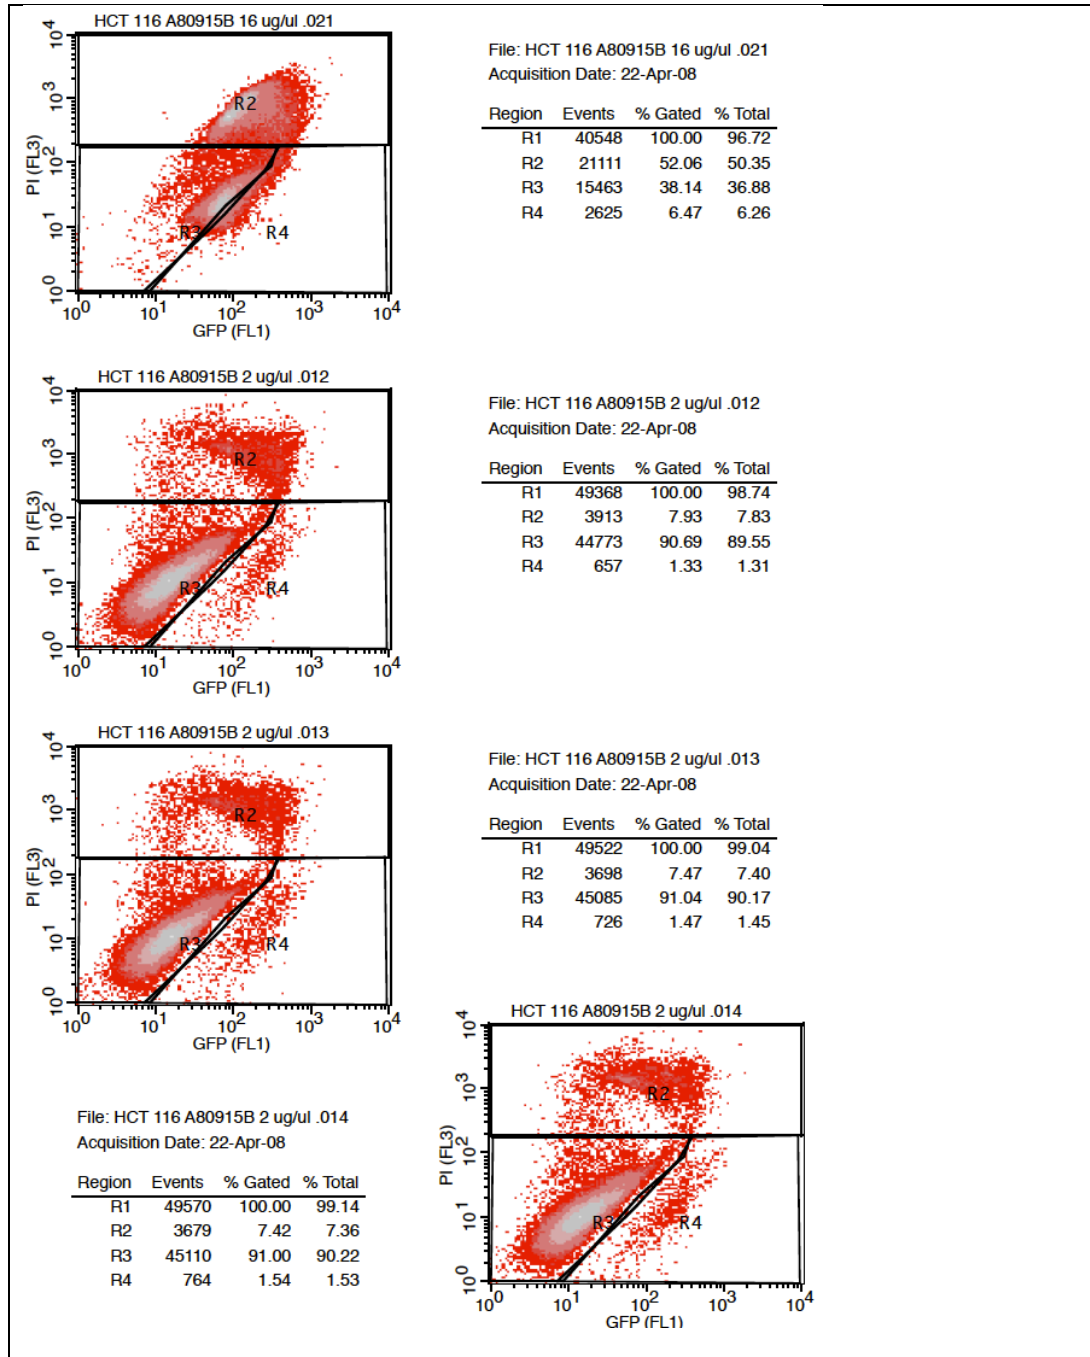

Napyradiomycin A80915B at 4 and 8 µg/mL

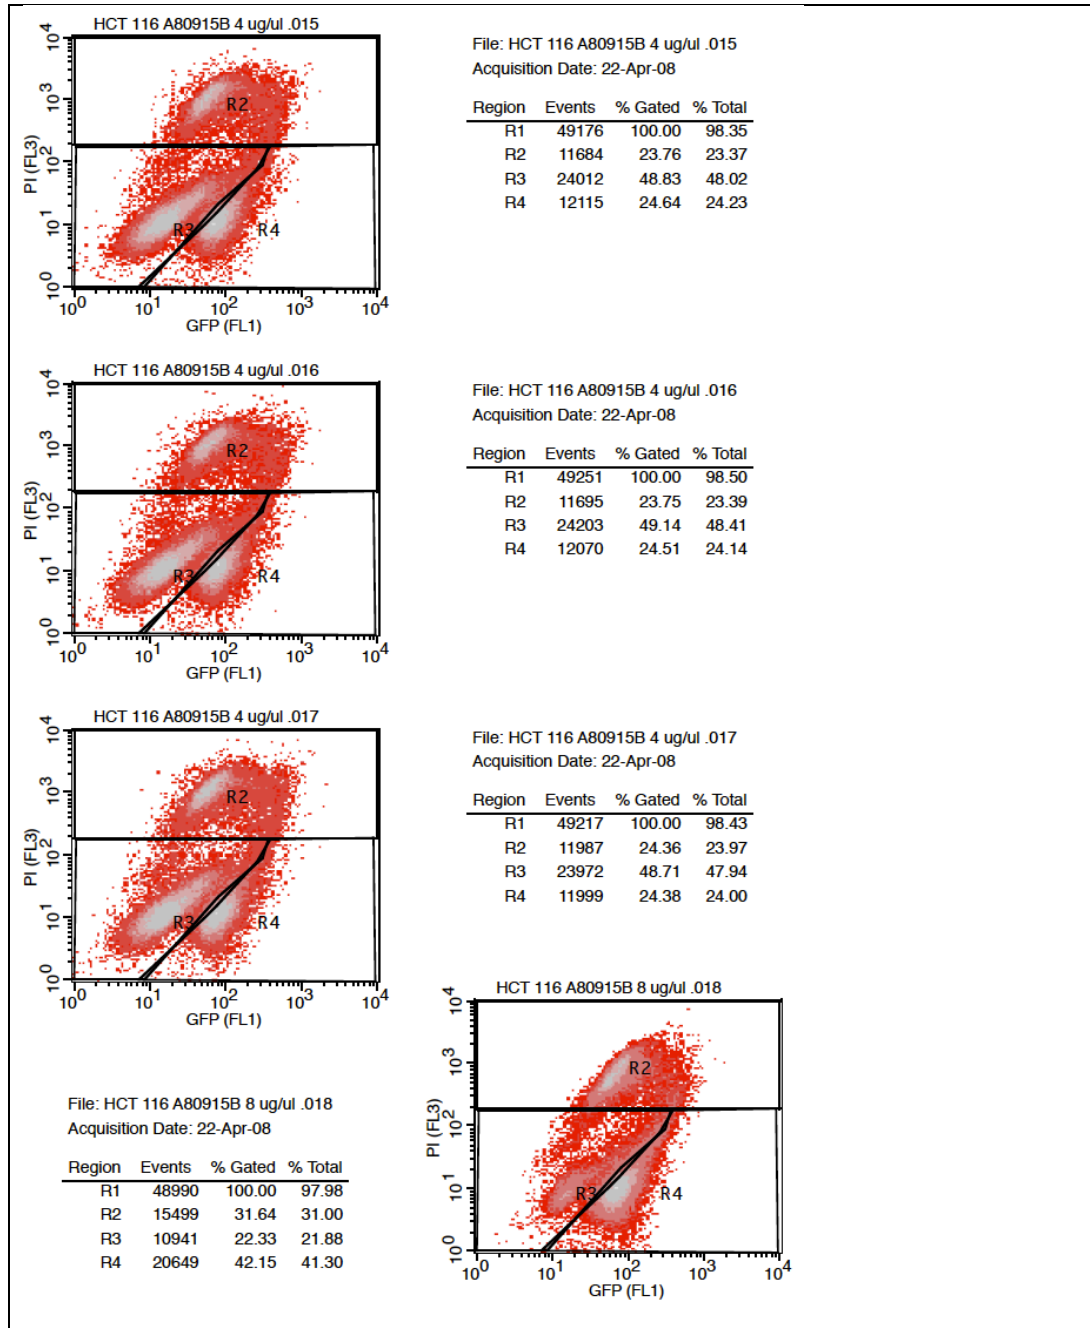

Napyradiomycin A80915B at 8 µg/mL and Napyradiomycin B3 at 0.5 µg/mL

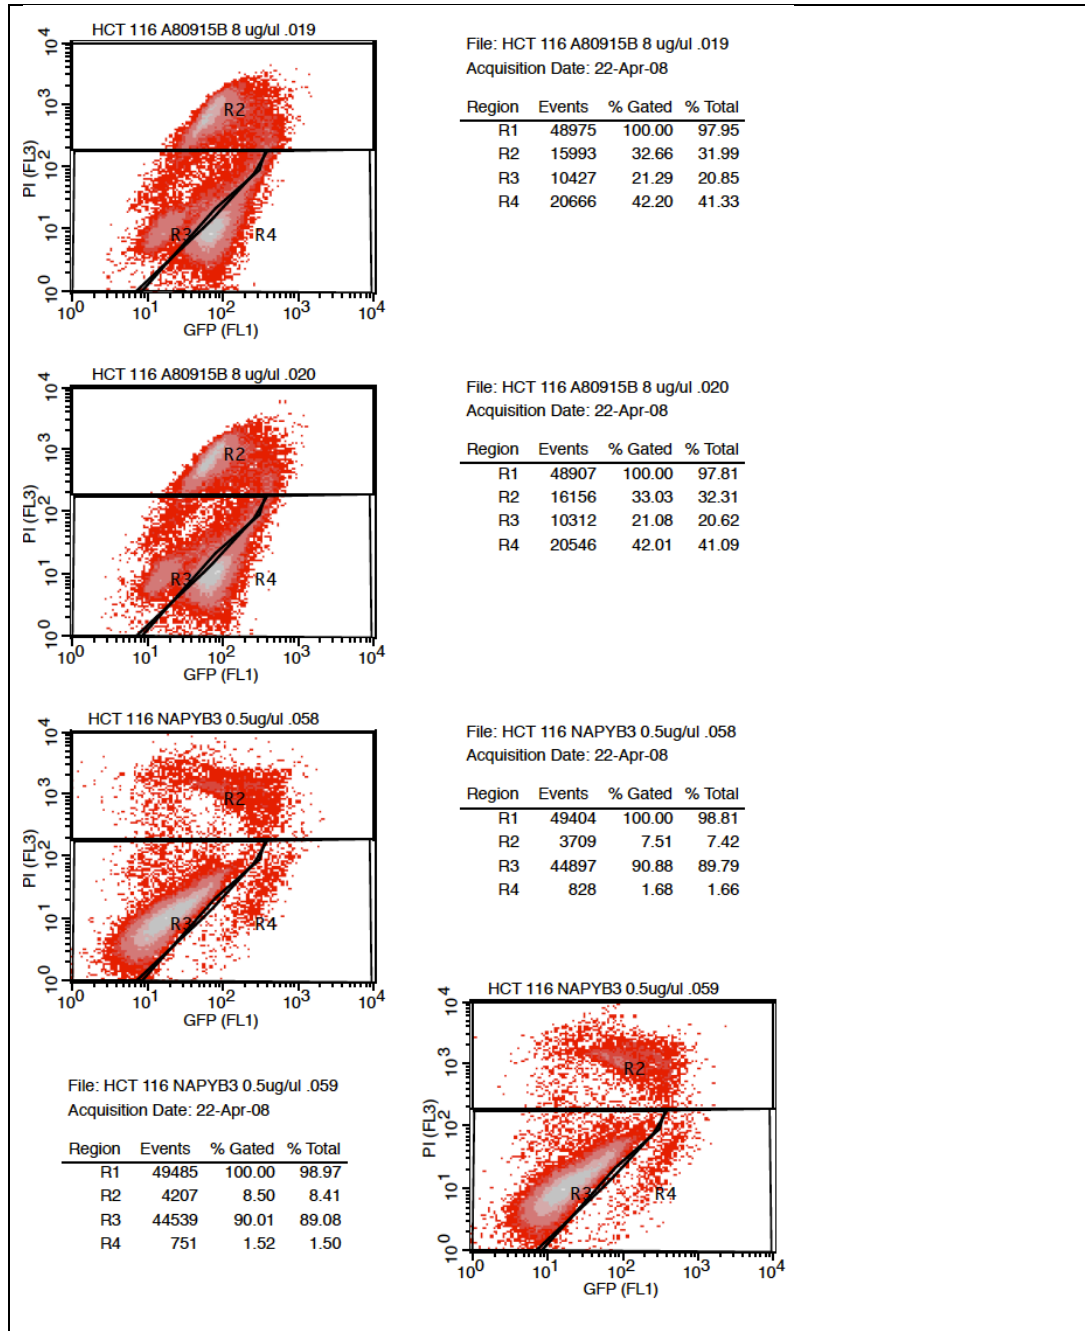

Napyradiomycin A80915A at 0.5 µg/mL

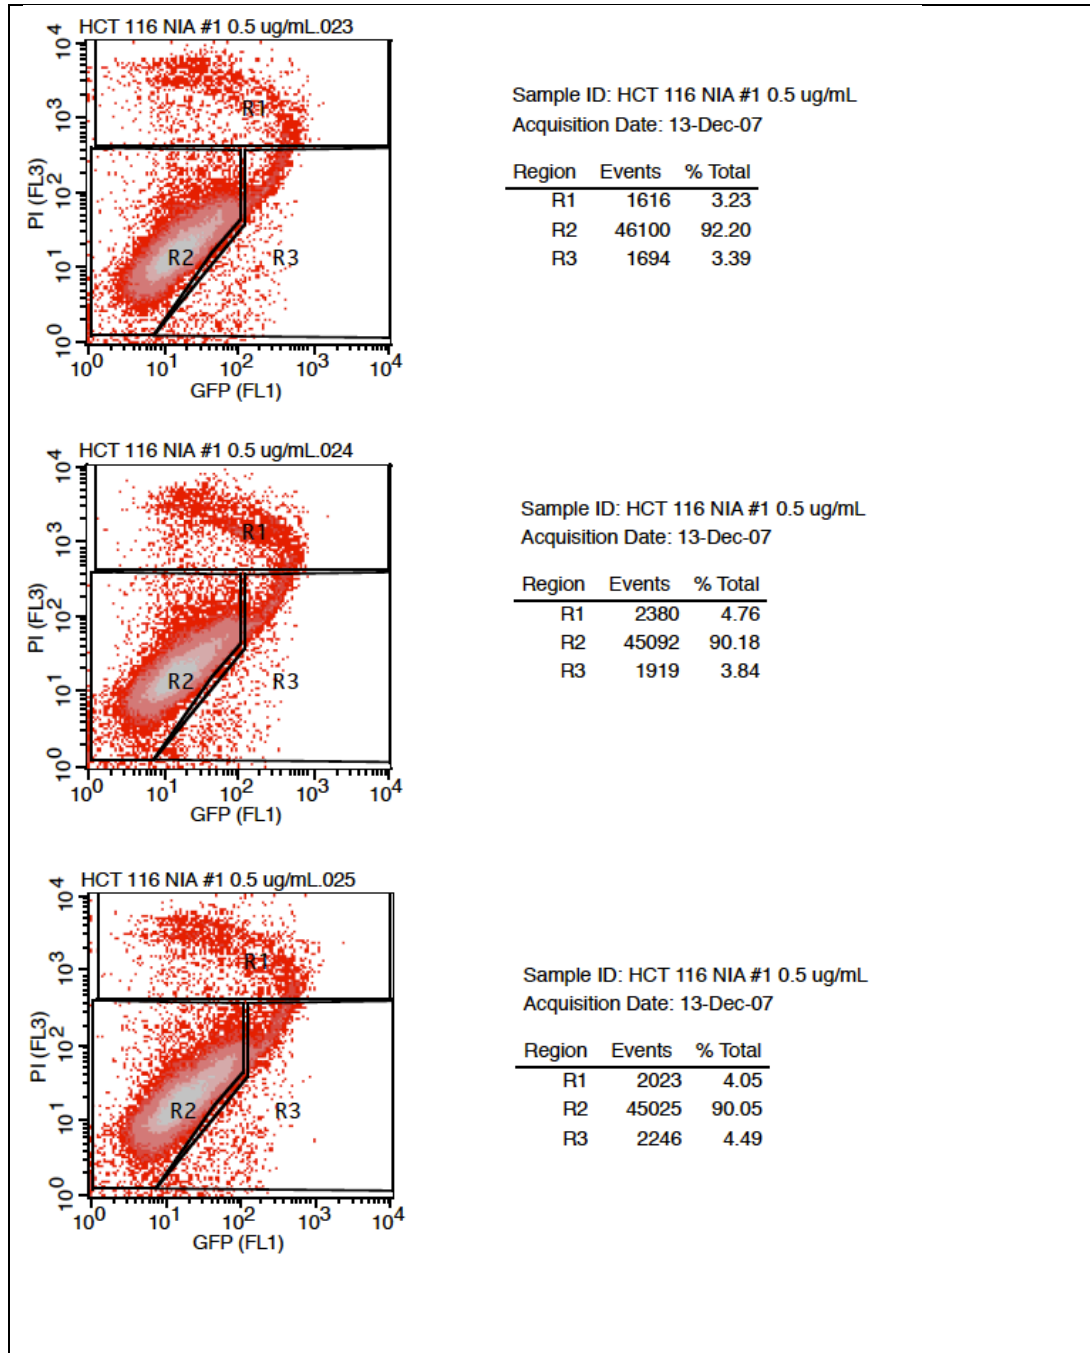



Napyradiomycin A80915A at 1.0 µg/mL

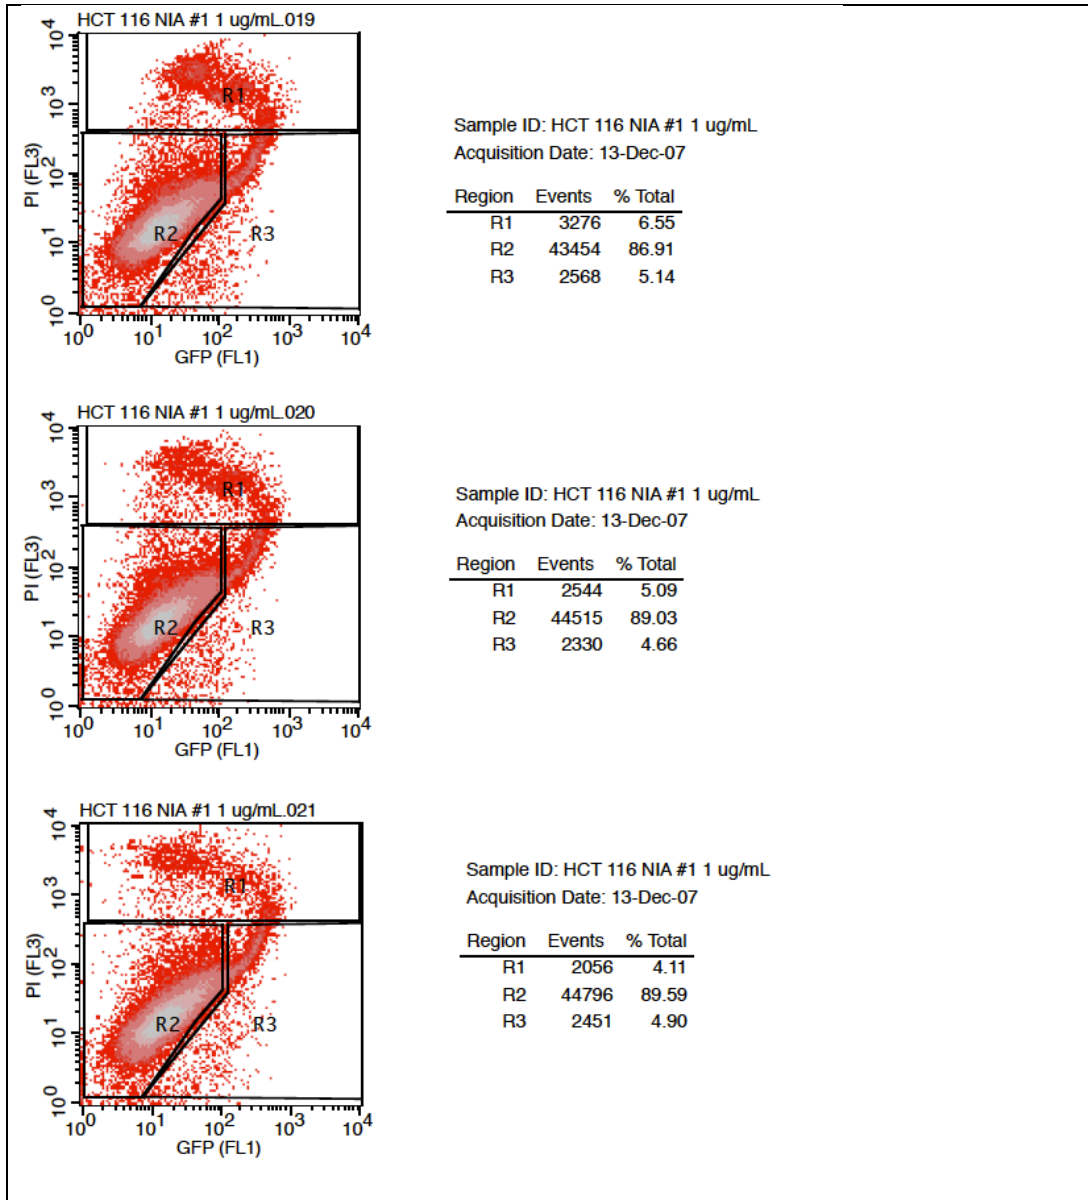

Napyradiomycin A80915A at 16 µg/mL

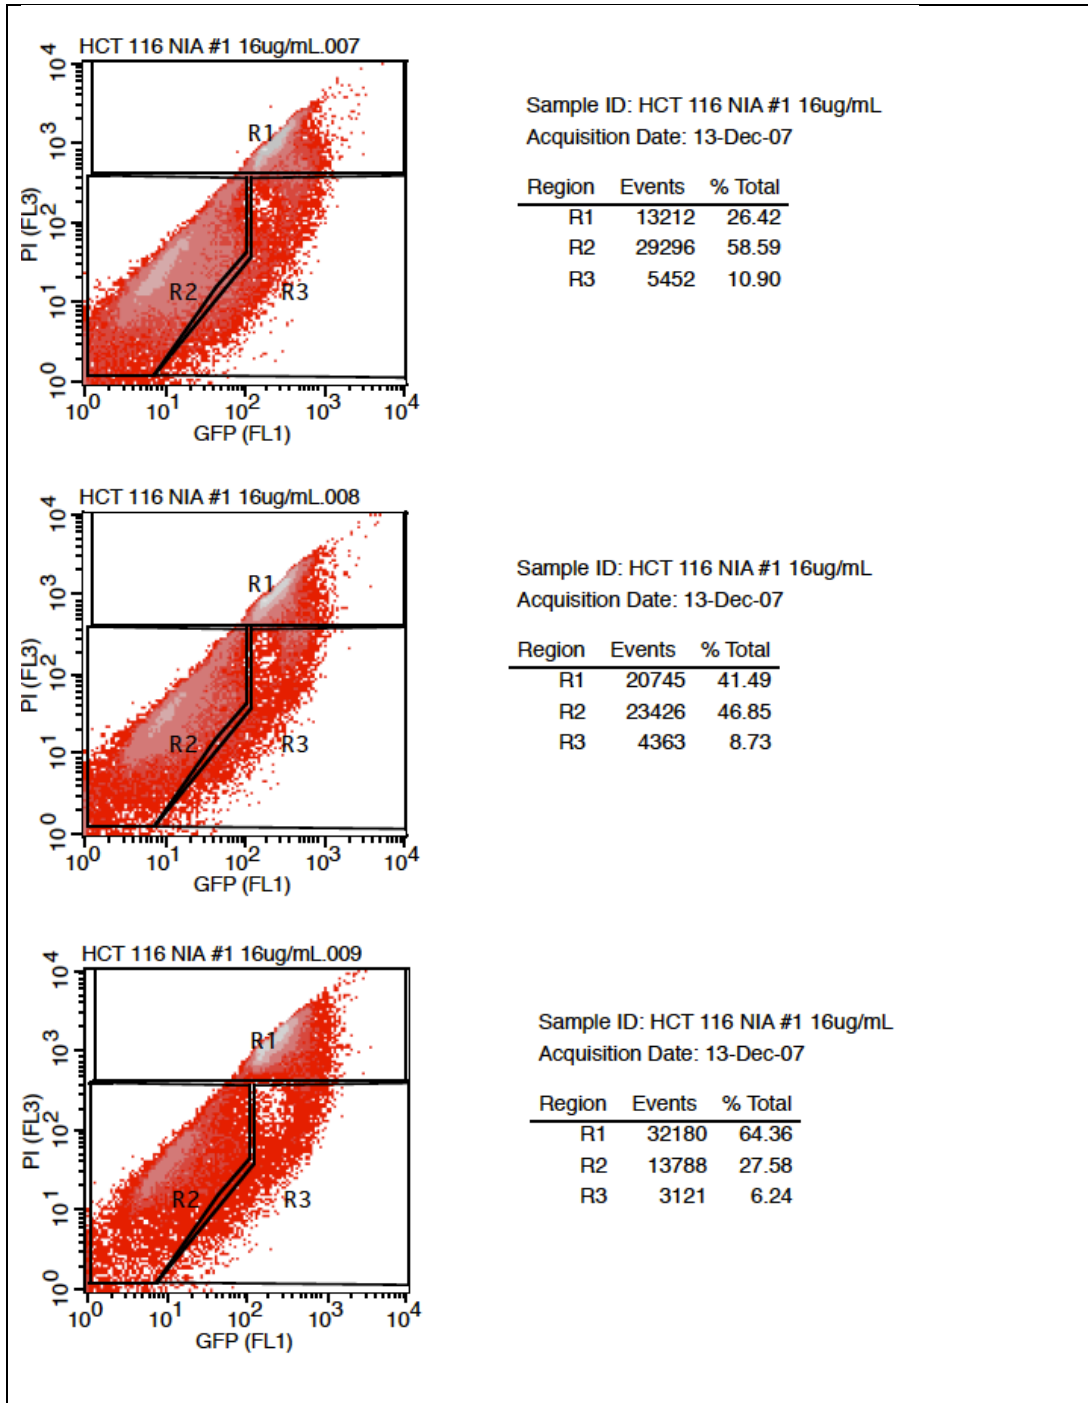

Napyradiomycin A80915A at 2 µg/mL

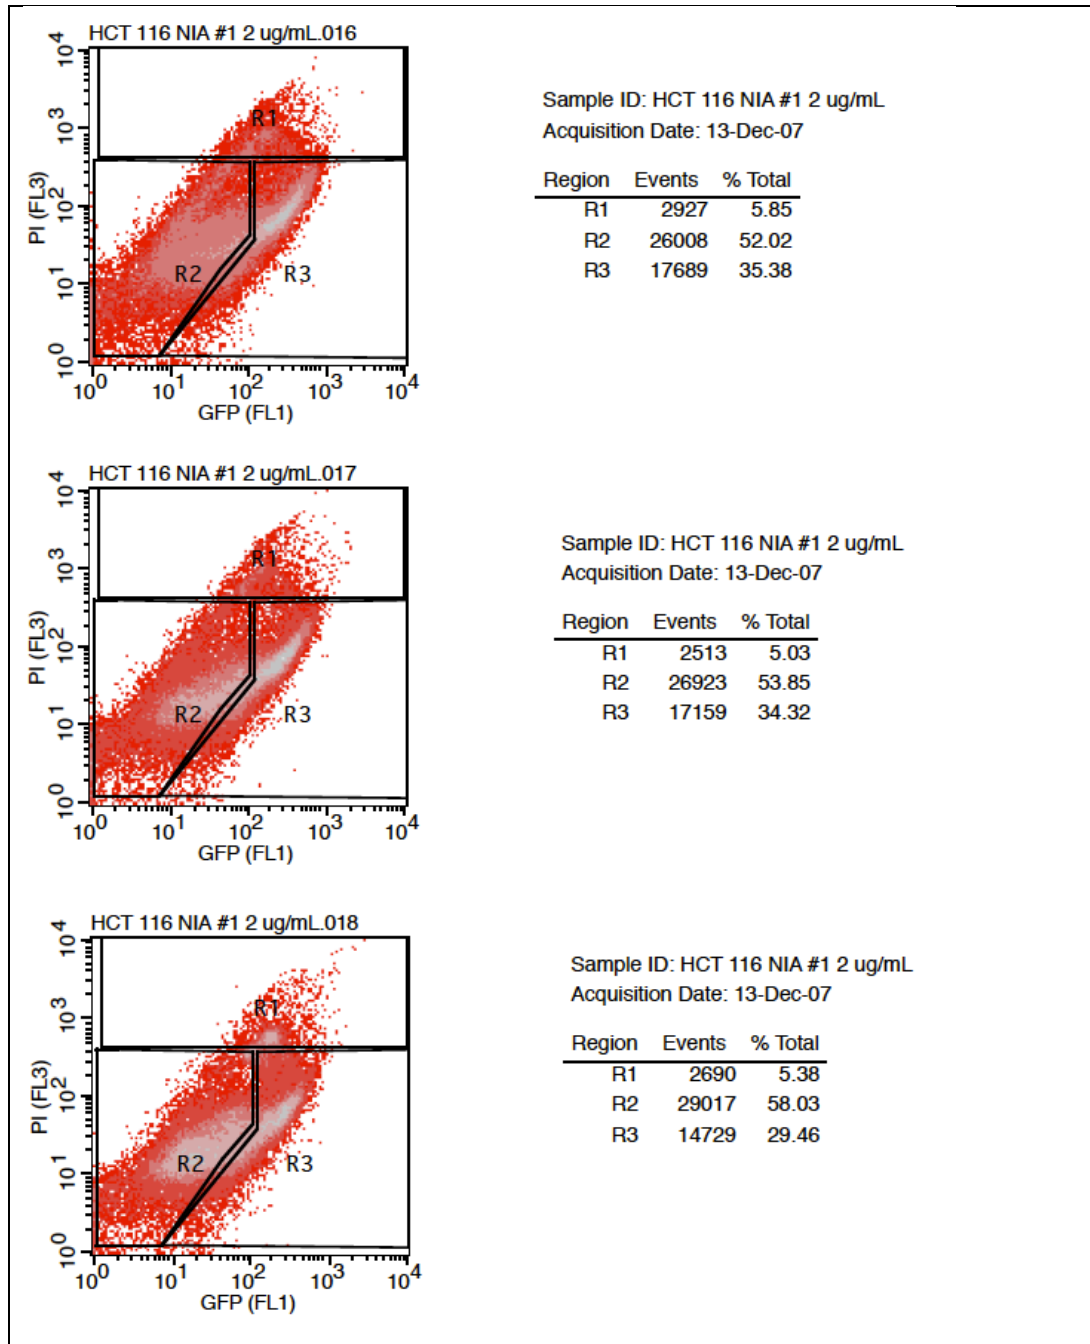

Napyradiomycin A80915A at 4 µg/mL

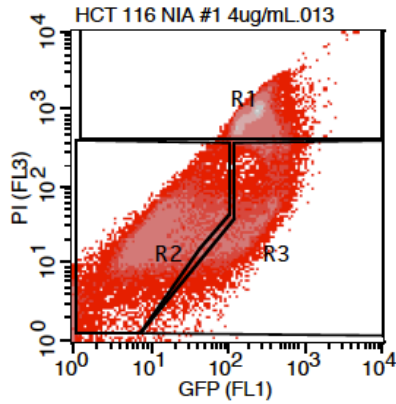

Sample ID: HCT 116 NIA #1 4ug/mL  
Acquisition Date: 13-Dec-07

| Region | Events | % Total |
|--------|--------|---------|
| R1     | 15341  | 30.68   |
| R2     | 22092  | 44.18   |
| R3     | 10098  | 20.20   |

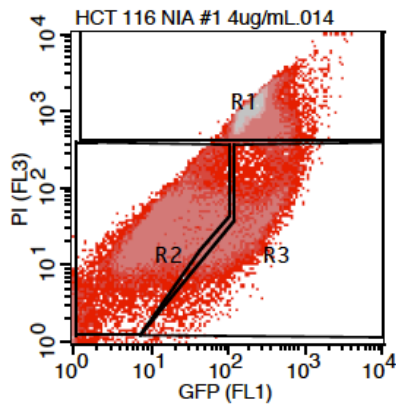

Sample ID: HCT 116 NIA #1 4ug/mL  
Acquisition Date: 13-Dec-07

| Region | Events | % Total |
|--------|--------|---------|
| R1     | 17635  | 35.27   |
| R2     | 21186  | 42.37   |
| R3     | 8862   | 17.72   |

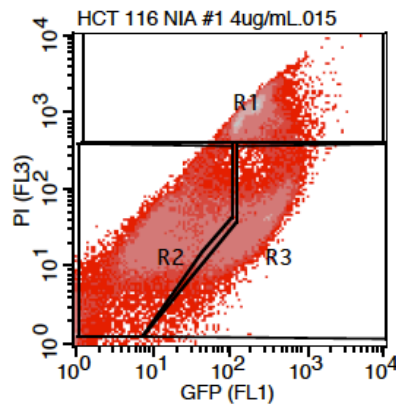

Sample ID: HCT 116 NIA #1 4ug/mL  
Acquisition Date: 13-Dec-07

| Region | Events | % Total |
|--------|--------|---------|
| R1     | 12444  | 24.89   |
| R2     | 21422  | 42.84   |
| R3     | 13514  | 27.03   |

Napyradiomycin A80915A at 8 µg/mL

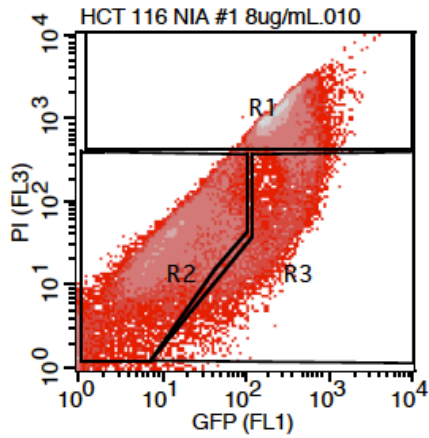

Sample ID: HCT 116 NIA #1 8ug/mL  
Acquisition Date: 13-Dec-07

| Region | Events | % Total |
|--------|--------|---------|
| R1     | 19095  | 38.19   |
| R2     | 21929  | 43.86   |
| R3     | 6927   | 13.85   |

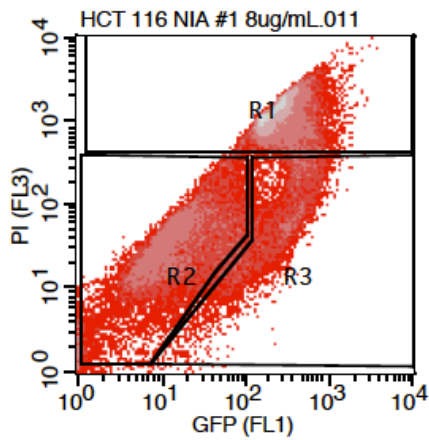

Sample ID: HCT 116 NIA #1 8ug/mL  
Acquisition Date: 13-Dec-07

| Region | Events | % Total |
|--------|--------|---------|
| R1     | 26104  | 52.21   |
| R2     | 16261  | 32.52   |
| R3     | 6367   | 12.73   |

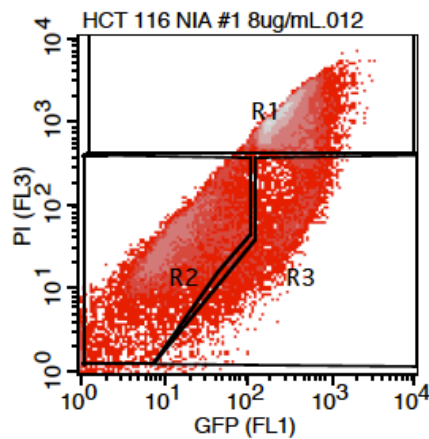

Sample ID: HCT 116 NIA #1 8ug/mL  
Acquisition Date: 13-Dec-07

| Region | Events | % Total |
|--------|--------|---------|
| R1     | 30387  | 60.77   |
| R2     | 13454  | 26.91   |
| R3     | 4919   | 9.84    |

Napyradiomycin CNQ525.510B (1) at 0.5 µg/mL

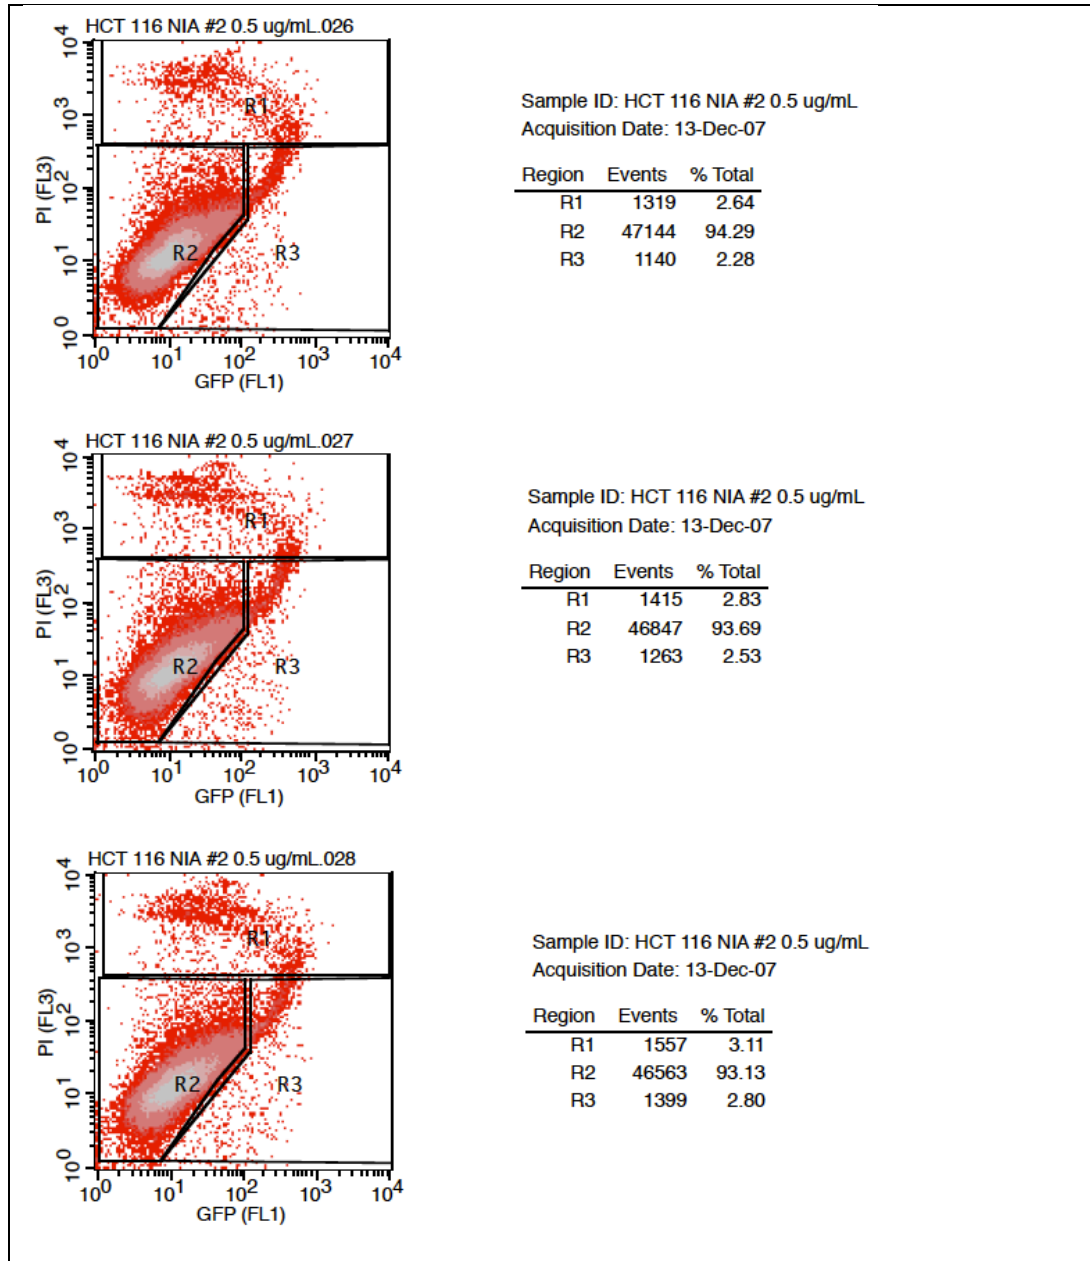

Napyradiomycin CNQ525.510B (1) at 1 µg/mL

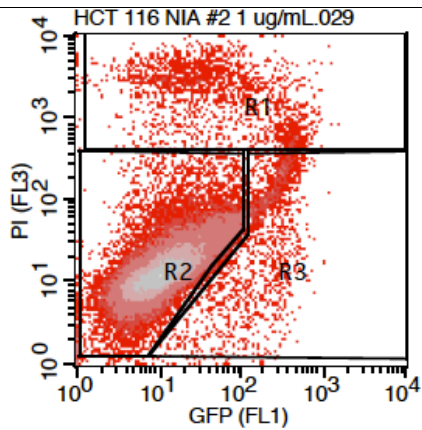

Sample ID: HCT 116 NIA #2 1 ug/mL  
Acquisition Date: 13-Dec-07

| Region | Events | % Total |
|--------|--------|---------|
| R1     | 1925   | 3.85    |
| R2     | 45537  | 91.07   |
| R3     | 1876   | 3.75    |

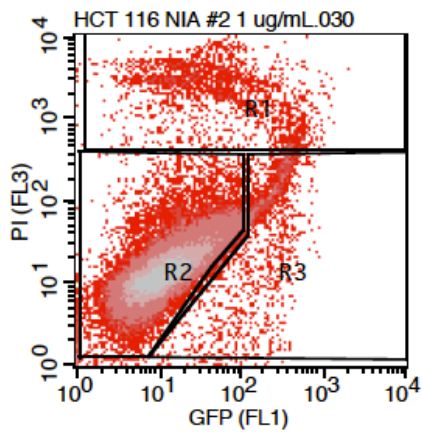

Sample ID: HCT 116 NIA #2 1 ug/mL  
Acquisition Date: 13-Dec-07

| Region | Events | % Total |
|--------|--------|---------|
| R1     | 2289   | 4.58    |
| R2     | 45073  | 90.15   |
| R3     | 1971   | 3.94    |

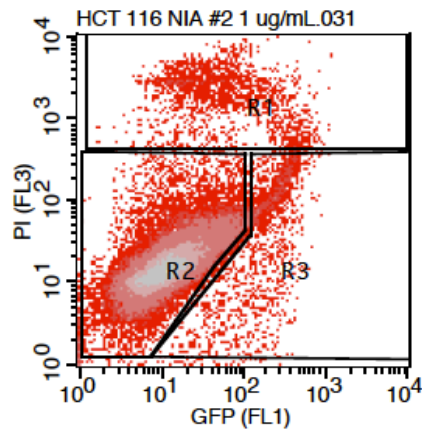

Sample ID: HCT 116 NIA #2 1 ug/mL  
Acquisition Date: 13-Dec-07

| Region | Events | % Total |
|--------|--------|---------|
| R1     | 1841   | 3.68    |
| R2     | 45718  | 91.44   |
| R3     | 1845   | 3.69    |

Napyradiomycin CNQ525.510B (1) at 16 µg/mL

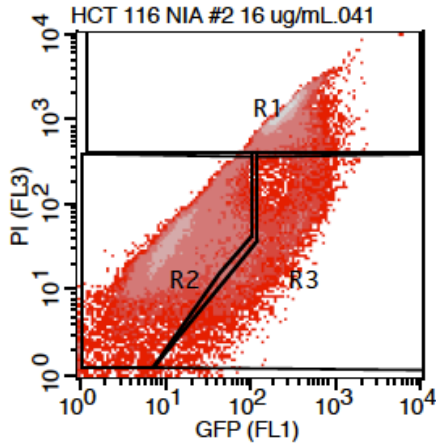

Sample ID: HCT 116 NIA #2 16 ug/mL  
Acquisition Date: 13-Dec-07

| Region | Events | % Total |
|--------|--------|---------|
| R1     | 15728  | 31.46   |
| R2     | 26312  | 52.62   |
| R3     | 6428   | 12.86   |

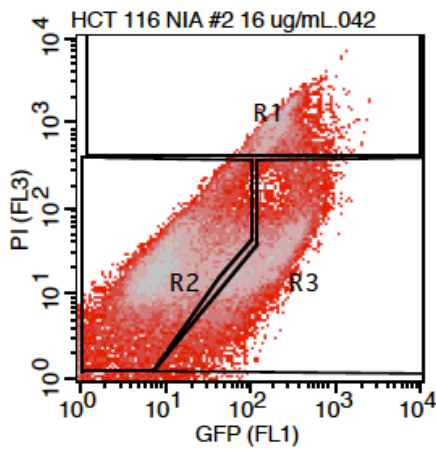

Sample ID: HCT 116 NIA #2 16 ug/mL  
Acquisition Date: 13-Dec-07

| Region | Events | % Total |
|--------|--------|---------|
| R1     | 5255   | 10.51   |
| R2     | 27662  | 55.32   |
| R3     | 14503  | 29.01   |

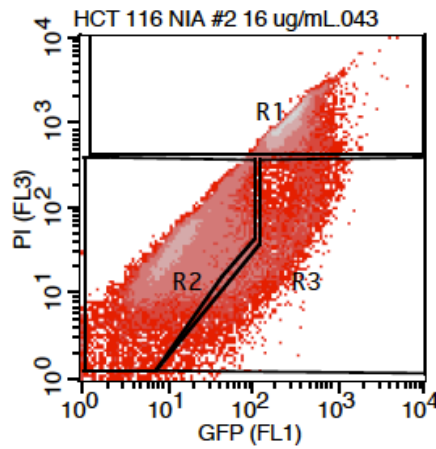

Sample ID: HCT 116 NIA #2 16 ug/mL  
Acquisition Date: 13-Dec-07

| Region | Events | % Total |
|--------|--------|---------|
| R1     | 16413  | 32.83   |
| R2     | 25446  | 50.89   |
| R3     | 6604   | 13.21   |



Napyradiomycin CNQ525.510B (1) at 2 µg/mL

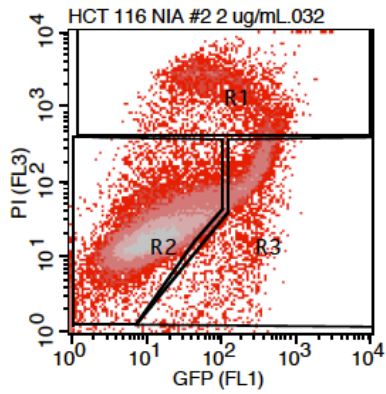

Sample ID: HCT 116 NIA #2 2 ug/mL  
Acquisition Date: 13-Dec-07

| Region | Events | % Total |
|--------|--------|---------|
| R1     | 3144   | 6.29    |
| R2     | 40799  | 81.60   |
| R3     | 4986   | 9.97    |

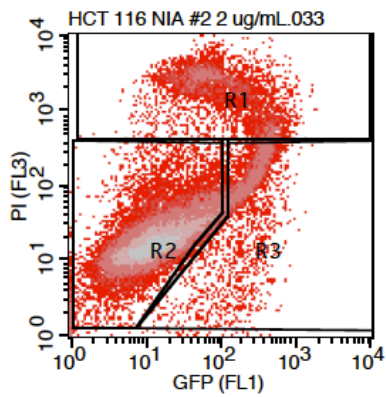

Sample ID: HCT 116 NIA #2 2 ug/mL  
Acquisition Date: 13-Dec-07

| Region | Events | % Total |
|--------|--------|---------|
| R1     | 4786   | 9.57    |
| R2     | 39554  | 79.11   |
| R3     | 4654   | 9.31    |

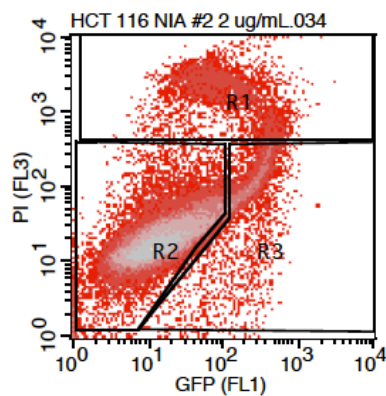

Sample ID: HCT 116 NIA #2 2 ug/mL  
Acquisition Date: 13-Dec-07

| Region | Events | % Total |
|--------|--------|---------|
| R1     | 4043   | 8.09    |
| R2     | 39739  | 79.48   |
| R3     | 5062   | 10.12   |

Napyradiomycin CNQ525.510B (1) at 4 µg/mL

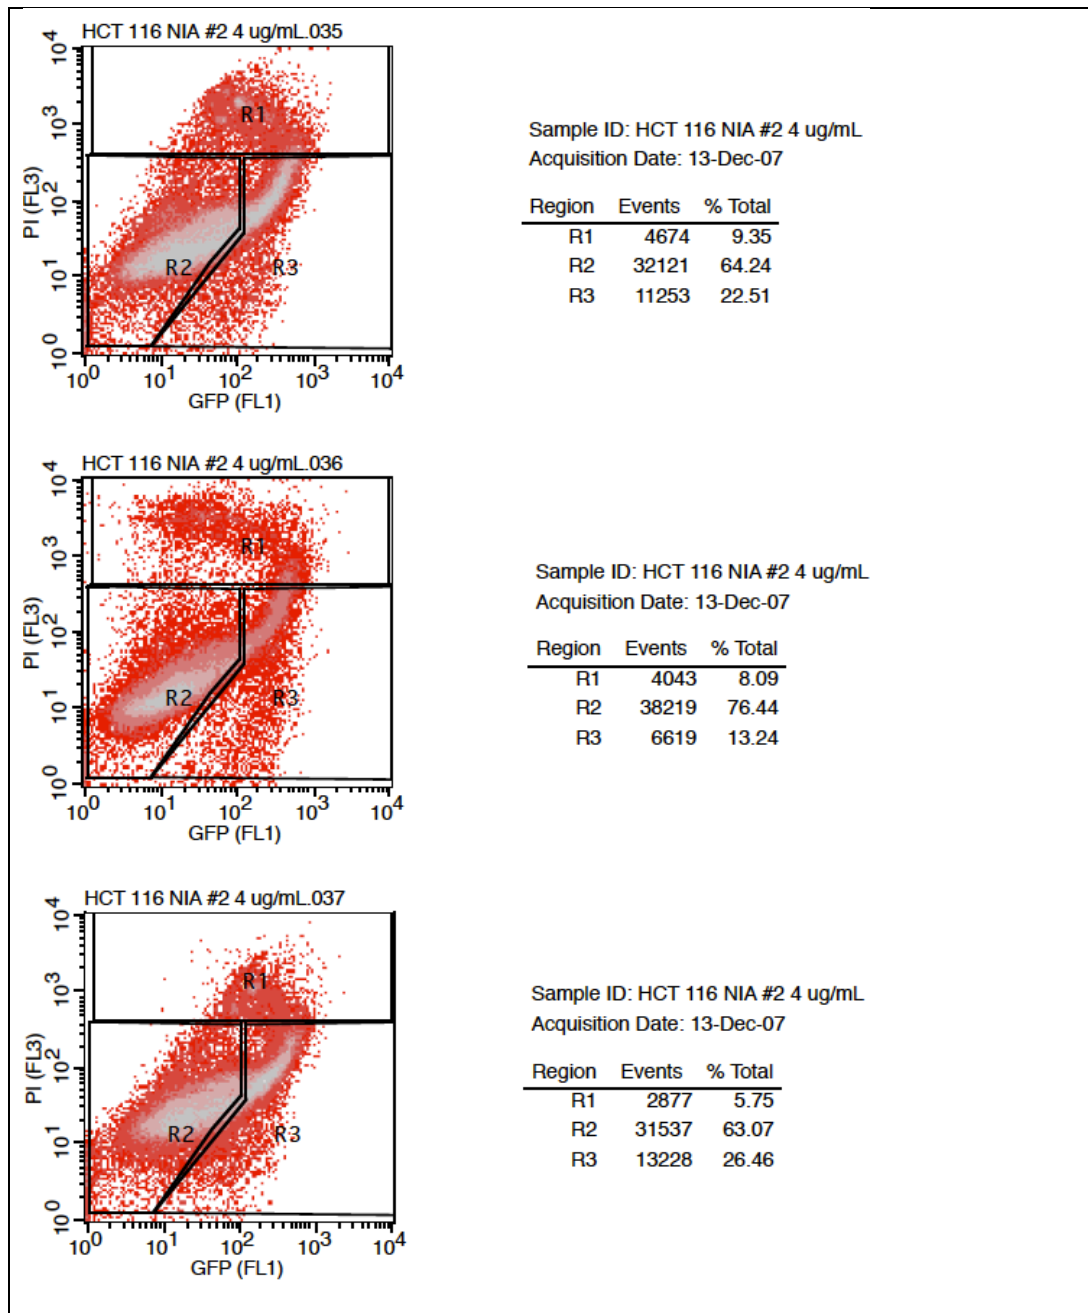

Napyradiomycin CNQ525.510B (1) at 8 µg/mL

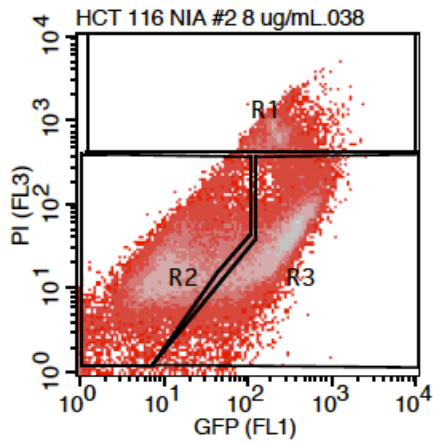

Sample ID: HCT 116 NIA #2 8 ug/mL  
Acquisition Date: 13-Dec-07

| Region | Events | % Total |
|--------|--------|---------|
| R1     | 3632   | 7.26    |
| R2     | 22738  | 45.48   |
| R3     | 21128  | 42.26   |

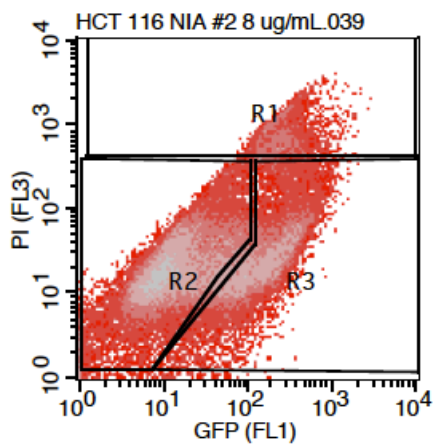

Sample ID: HCT 116 NIA #2 8 ug/mL  
Acquisition Date: 13-Dec-07

| Region | Events | % Total |
|--------|--------|---------|
| R1     | 3478   | 6.96    |
| R2     | 28603  | 57.21   |
| R3     | 15245  | 30.49   |

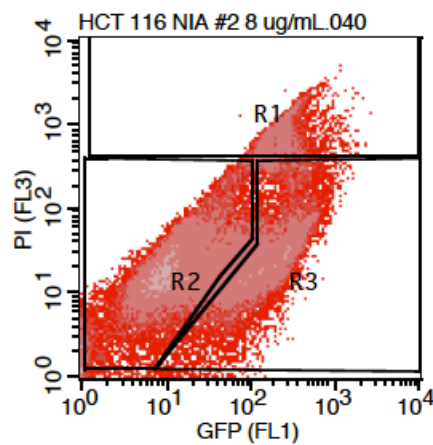

Sample ID: HCT 116 NIA #2 8 ug/mL  
Acquisition Date: 13-Dec-07

| Region | Events | % Total |
|--------|--------|---------|
| R1     | 4280   | 8.56    |
| R2     | 26687  | 53.37   |
| R3     | 16114  | 32.23   |

Napyradiomycin A80515C at 0.5  $\mu\text{g}/\text{mL}$

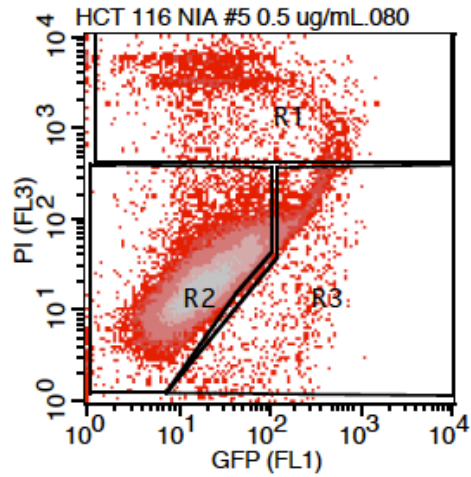

Sample ID: HCT 116 NIA #5 0.5 ug/mL  
Acquisition Date: 13-Dec-07

| Region | Events | % Total |
|--------|--------|---------|
| R1     | 2190   | 4.38    |
| R2     | 45119  | 90.24   |
| R3     | 2135   | 4.27    |

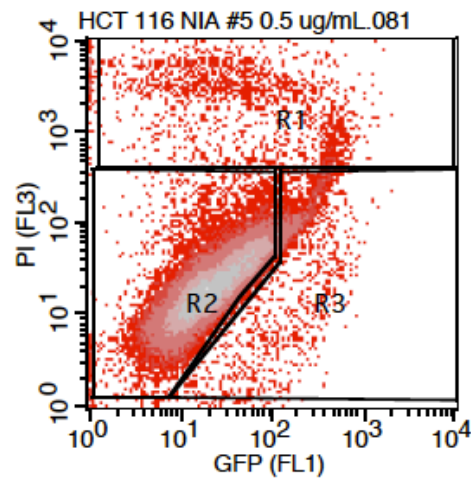

Sample ID: HCT 116 NIA #5 0.5 ug/mL  
Acquisition Date: 13-Dec-07

| Region | Events | % Total |
|--------|--------|---------|
| R1     | 1607   | 3.21    |
| R2     | 45122  | 90.24   |
| R3     | 2530   | 5.06    |

Napyradiomycin A80515C at 0.5 and 1 µg/mL

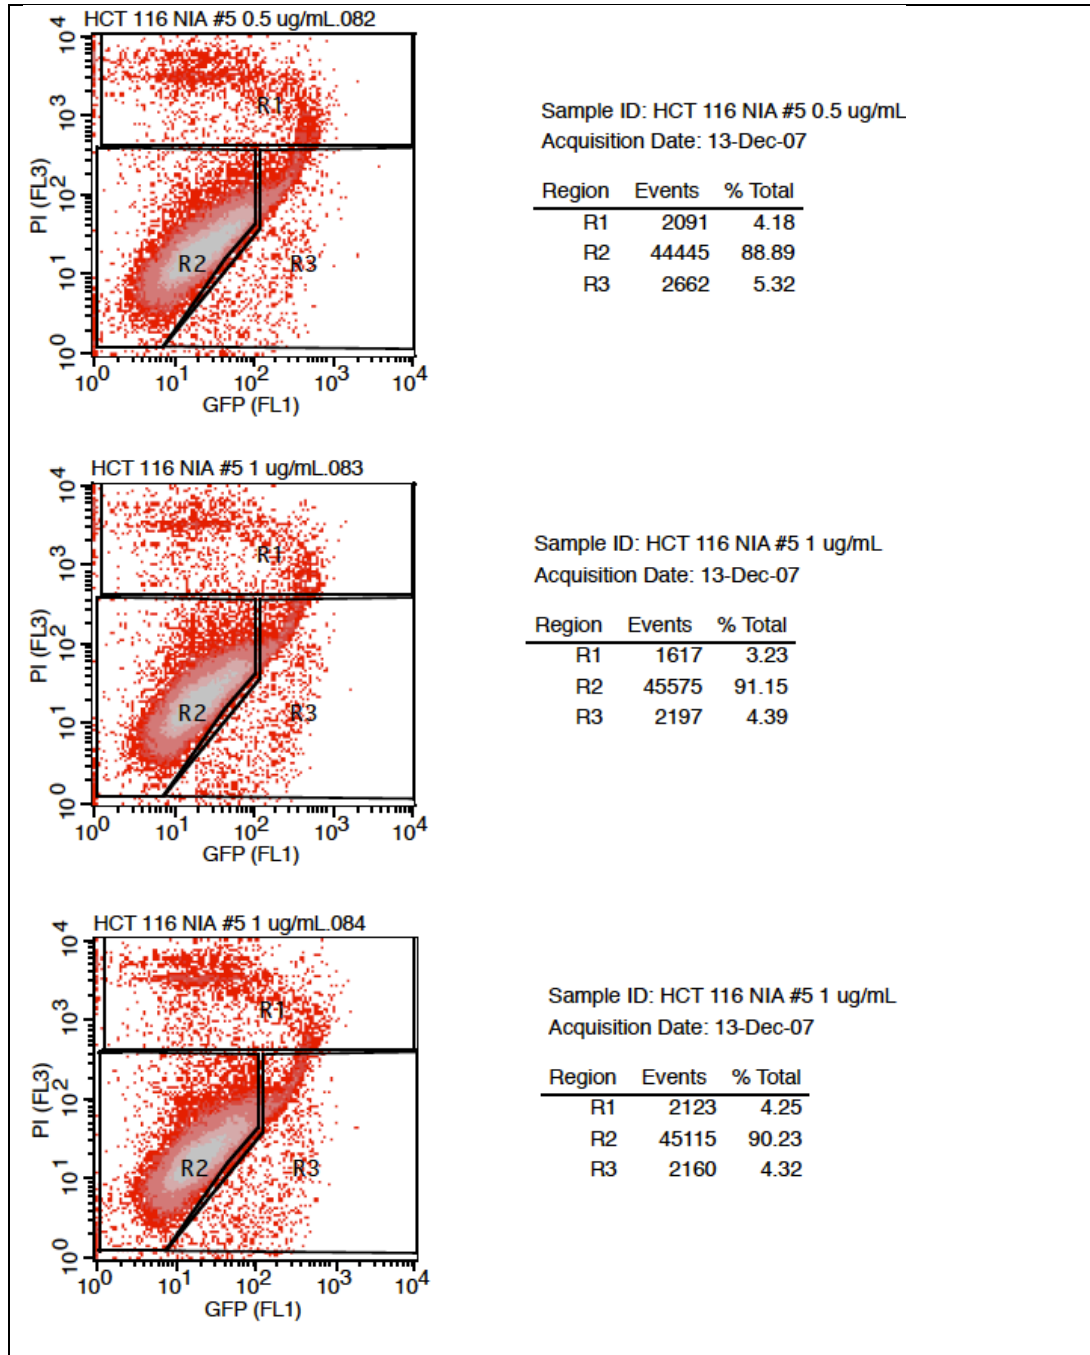

Napyradiomycin A80515C at 1 and 16  $\mu\text{g}/\text{mL}$

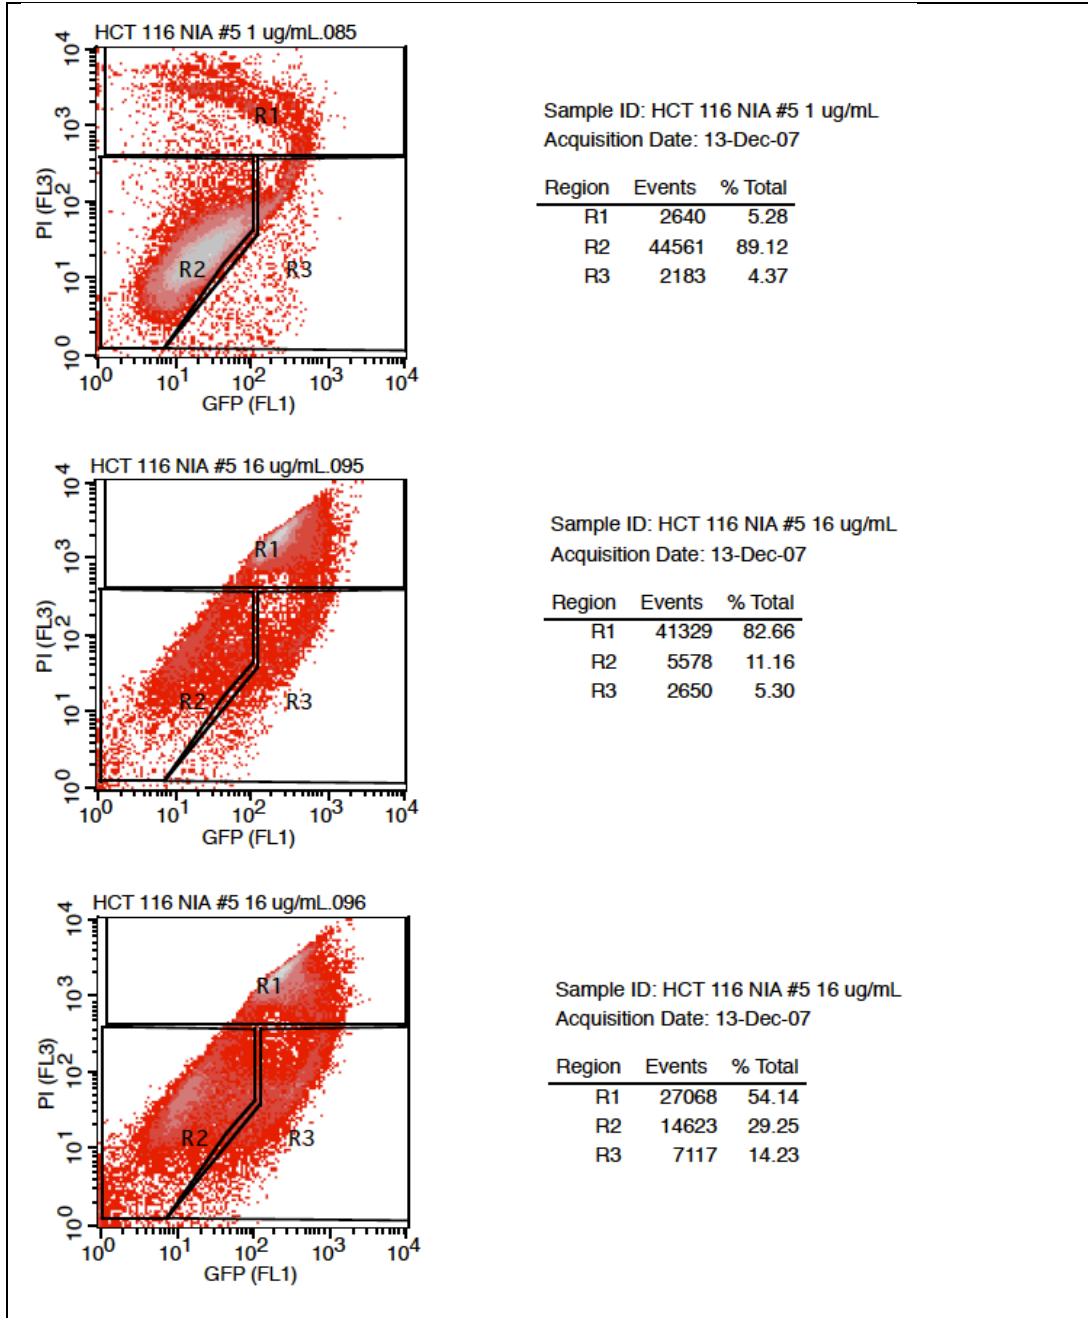

Napyradiomycin A80515C at 2 and 16  $\mu\text{g}/\text{mL}$

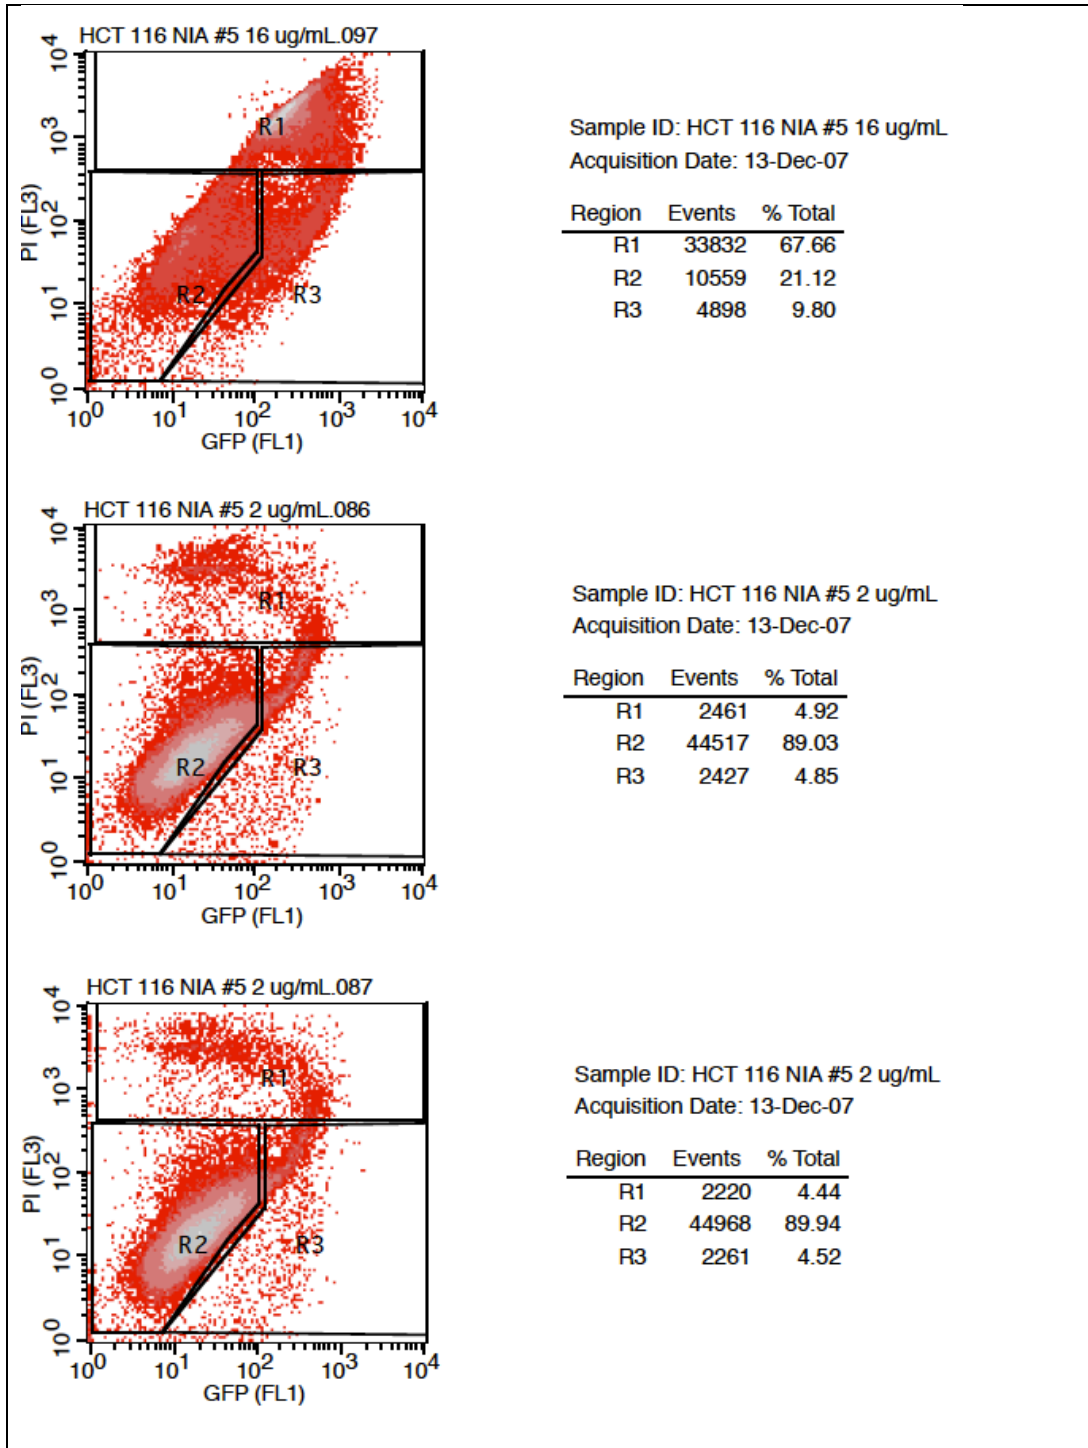



Napyradiomycin A80515C at 2 and 4  $\mu\text{g}/\text{mL}$

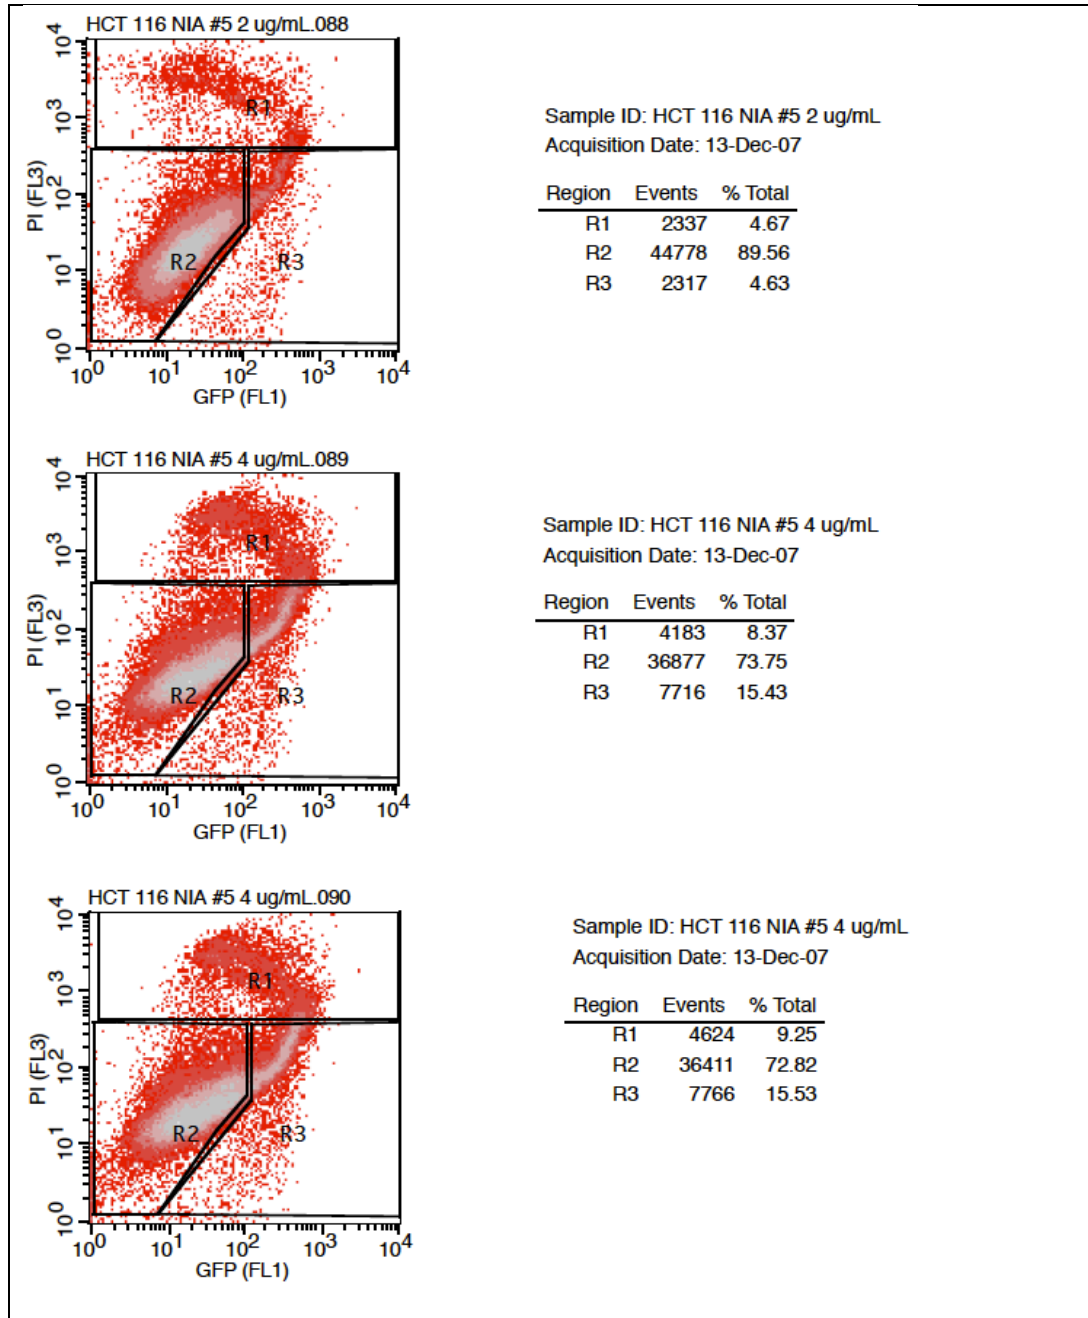



Napyradiomycin A80515C at 4 and 8  $\mu\text{g}/\text{mL}$

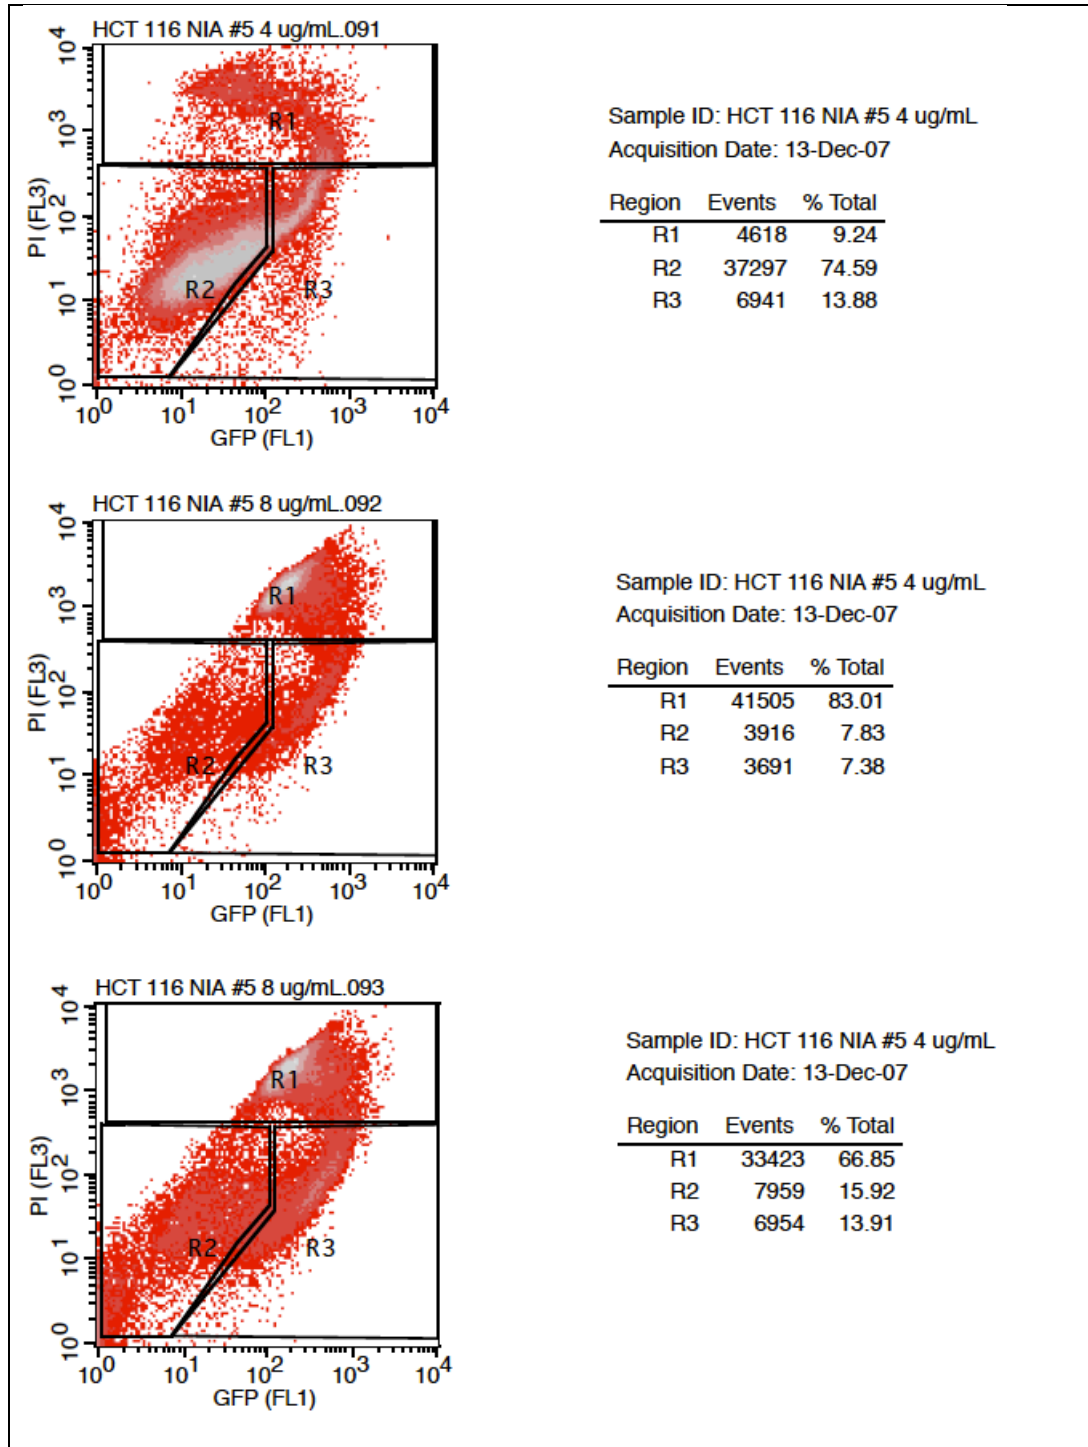

Napyradiomycin A80515C at 4 and 8  $\mu\text{g}/\text{mL}$  and no treatment controls

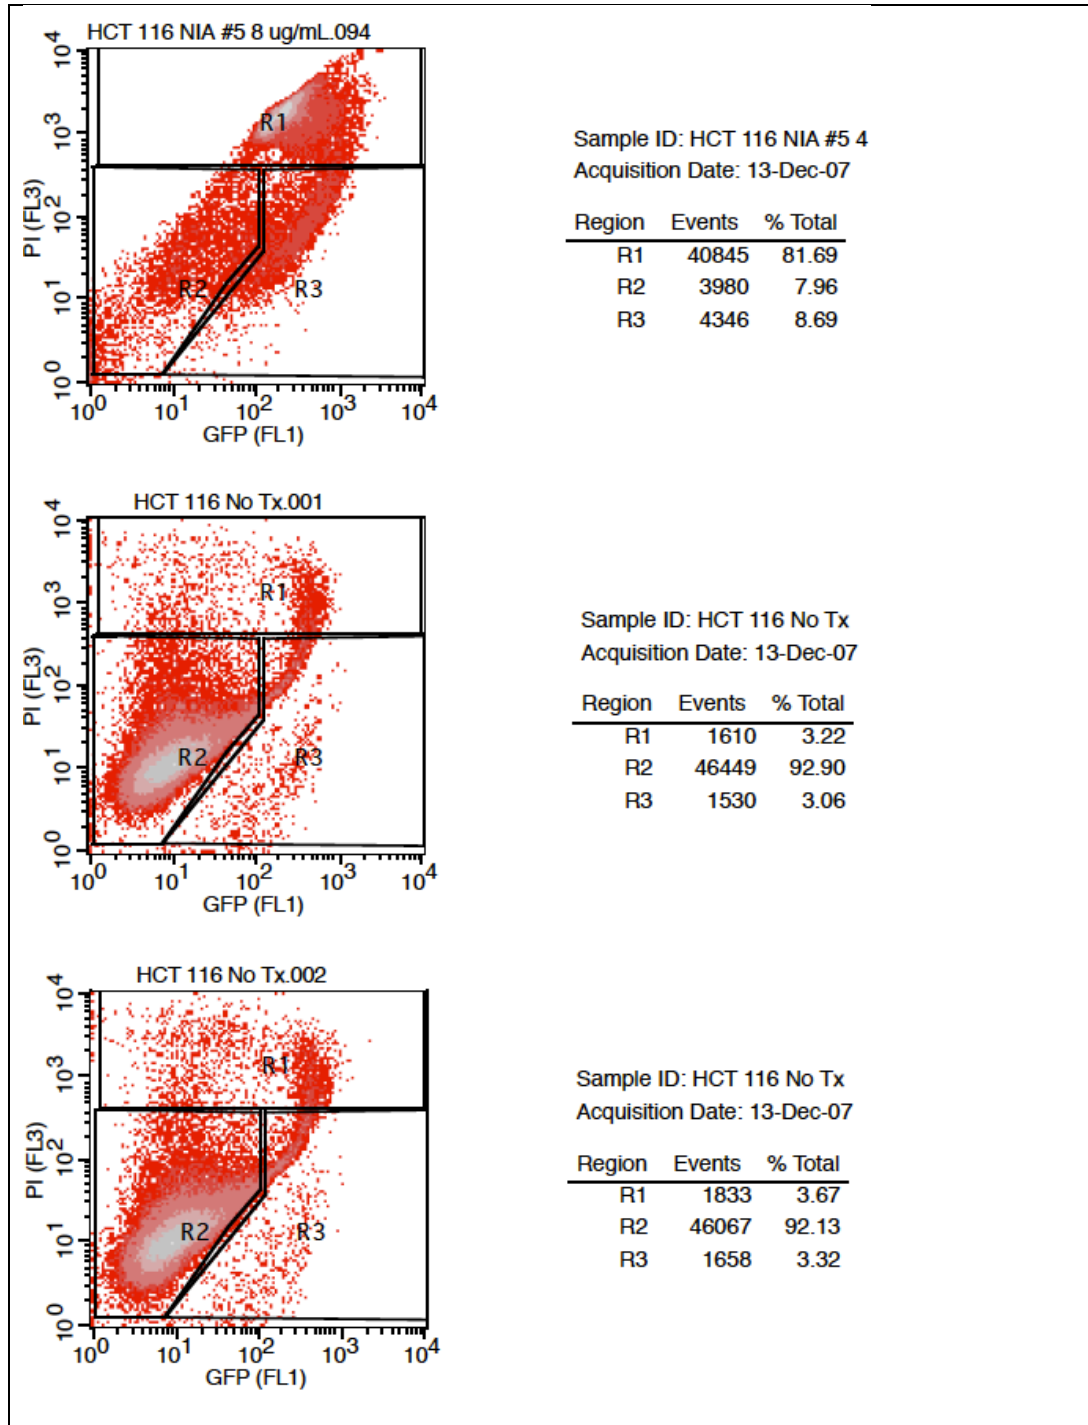

Supplement: NIHMS549508-supplement-1_si_001.pdf [file NIHMS549508-supplement-1_si_001.pdf]
